# Supplementary material for: Blood Immunosenescence Signatures Reflecting Age, Frailty and Tumor Immune Infiltrate in Patients with Early Luminal Breast Cancer
Source: MDPI journal article supplement (doi:10.3390/cancers13092185), 2021-05-02
Supplement: s1 [file s1]

Table S5: Individual performances of biomarkers correlating with CD3 infiltration in the invasive front (high, intermediate or low infiltration). The table reports the number of patients (N) for which the biomarkers could be measured. The area under the curve (AUC) via receiver operating characteristics (ROC), P-value (Wilcox rank-sum test) and log fold change (FC) were computed for each biomarker. The log FC compared case vs. control. A positive log FC indicates that the measurement is higher than its reference while a negative measurement indicates that is smaller. Based on these statistics AUC, P-value, log FC scores were calculated. The final score combines the 3 scores, where AUC weighted double. The biomarkers are ranked based on their final score.

|                              | Blood markers                                                    | N  | AUC   | P-value | log FC | AUC score | P-value score | log FC score | Final score |
|------------------------------|------------------------------------------------------------------|----|-------|---------|--------|-----------|---------------|--------------|-------------|
| <b>HIGH CD3 INFILTRATION</b> |                                                                  |    |       |         |        |           |               |              |             |
| 1                            | miR-195                                                          | 61 | 0.304 | 0.024   | 1.097  | 17        | 17            | 23           | 18.5        |
| 2                            | miR-150                                                          | 61 | 0.311 | 0.029   | 0.710  | 22        | 21            | 39           | 26          |
| 3                            | Tumor grade                                                      | 61 | 0.163 | 0.000   | 0.399  | 1         | 1             | 103          | 26.5        |
| 4                            | miR-424                                                          | 61 | 0.683 | 0.036   | -0.633 | 25        | 28            | 48           | 31.5        |
| 5                            | EM CD4 <sup>+</sup> CD27 <sup>+</sup> CD28 <sup>-</sup> cells    | 53 | 0.324 | 0.054   | 0.563  | 31        | 36            | 60           | 39.5        |
| 6                            | Gal-9                                                            | 61 | 0.643 | 0.099   | -0.661 | 55        | 55            | 44           | 52.25       |
| 7                            | NK-like T-cells                                                  | 53 | 0.358 | 0.120   | 0.983  | 58        | 69            | 26           | 52.75       |
| 8                            | Age                                                              | 61 | 0.701 | 0.021   | -0.251 | 14        | 13            | 182          | 55.75       |
| 9                            | miR-20a                                                          | 61 | 0.332 | 0.053   | 0.334  | 36        | 35            | 135          | 60.5        |
| 10                           | IL-1 $\alpha$                                                    | 61 | 0.651 | 0.082   | -0.320 | 42        | 45            | 142          | 67.75       |
| 11                           | miR-125b                                                         | 61 | 0.361 | 0.110   | 0.374  | 61        | 62            | 113          | 74.25       |
| 12                           | TEMRA CD8 <sup>+</sup> CD57 <sup>+</sup> cells                   | 53 | 0.357 | 0.119   | 0.361  | 57        | 66            | 119          | 74.75       |
| 13                           | TEMRA CD8 <sup>+</sup> CD27 <sup>+</sup> CD28 <sup>+</sup> cells | 53 | 0.364 | 0.138   | 0.388  | 64        | 78            | 110          | 79          |
| 14                           | Hematopoietic stem cells                                         | 53 | 0.621 | 0.185   | -0.551 | 86        | 95            | 62           | 82.25       |
| 15                           | miR-126                                                          | 61 | 0.376 | 0.154   | 0.485  | 82        | 85            | 80           | 82.25       |
| 16                           | TEMRA CD8 <sup>+</sup> CD27 <sup>+</sup> cells                   | 53 | 0.369 | 0.152   | 0.369  | 72        | 83            | 115          | 85.5        |
| 17                           | G8 score                                                         | 26 | 0.746 | 0.174   | -0.145 | 4         | 92            | 264          | 91          |
| 18                           | TIM-3                                                            | 61 | 0.614 | 0.191   | -0.470 | 95        | 102           | 86           | 94.5        |
| 19                           | IL-17A                                                           | 61 | 0.401 | 0.258   | 2.255  | 125       | 124           | 6            | 95          |
| 20                           | TEMRA CD4 <sup>+</sup> CD27 <sup>+</sup> CD28 <sup>-</sup> cells | 53 | 0.357 | 0.118   | -0.189 | 56        | 65            | 231          | 102         |
| 21                           | TEMRA CD8 <sup>+</sup> CD27 <sup>+</sup> CD28 <sup>-</sup> cells | 53 | 0.380 | 0.190   | 0.311  | 87        | 100           | 145          | 104.75      |
| 22                           | CD86                                                             | 61 | 0.607 | 0.221   | -0.344 | 104       | 109           | 130          | 111.75      |
| 23                           | 4-1BB                                                            | 61 | 0.418 | 0.261   | 1.945  | 158       | 126           | 7            | 112.25      |
| 24                           | CD4 <sup>+</sup> CD27 <sup>+</sup> CD28 <sup>-</sup> cells       | 53 | 0.361 | 0.128   | 0.158  | 60        | 74            | 256          | 112.5       |
| 25                           | Naive CD8 <sup>+</sup> CD27 <sup>+</sup> CD28 <sup>-</sup> cells | 53 | 0.370 | 0.155   | 0.180  | 73        | 86            | 239          | 117.75      |
| 26                           | TEMRA CD4 <sup>+</sup> CD57 <sup>+</sup> cells                   | 53 | 0.373 | 0.164   | -0.183 | 76        | 88            | 233          | 118.25      |
| 27                           | TEMRA CD4 <sup>+</sup> CD27 <sup>+</sup> cells                   | 53 | 0.396 | 0.254   | 0.337  | 113       | 120           | 131          | 119.25      |
| 28                           | Monocytes                                                        | 53 | 0.375 | 0.175   | 0.170  | 81        | 94            | 246          | 125.5       |
| 29                           | TEMRA CD8 <sup>+</sup> cells                                     | 53 | 0.385 | 0.207   | 0.210  | 93        | 105           | 216          | 126.75      |
| 30                           | TEMRA CD4 <sup>+</sup> CD27 <sup>+</sup> CD28 <sup>+</sup> cells | 53 | 0.401 | 0.280   | 0.336  | 122       | 137           | 133          | 128.5       |
| 31                           | CD4 <sup>+</sup> CD28 <sup>+</sup> cells                         | 53 | 0.648 | 0.104   | -0.029 | 49        | 60            | 369          | 131.75      |
| 32                           | CD8 <sup>+</sup> cells                                           | 53 | 0.394 | 0.249   | 0.222  | 108       | 119           | 194          | 132.25      |
| 33                           | miR-223                                                          | 61 | 0.404 | 0.273   | 0.327  | 131       | 134           | 136          | 133         |
| 34                           | sCD25                                                            | 61 | 0.597 | 0.269   | -0.303 | 128       | 131           | 149          | 134         |
| 35                           | IFN- $\gamma$                                                    | 61 | 0.586 | 0.322   | -0.434 | 150       | 158           | 96           | 138.5       |

|    |                                                                  |    |       |       |        |     |     |     |        |
|----|------------------------------------------------------------------|----|-------|-------|--------|-----|-----|-----|--------|
| 36 | let-7i                                                           | 61 | 0.604 | 0.231 | -0.213 | 115 | 117 | 207 | 138.5  |
| 37 | CM CD4 <sup>+</sup> CD27 <sup>+</sup> CD28 <sup>-</sup> cells    | 53 | 0.391 | 0.213 | -0.172 | 102 | 107 | 245 | 139    |
| 38 | let-7e                                                           | 61 | 0.587 | 0.319 | -0.379 | 148 | 155 | 112 | 140.75 |
| 39 | IL-6                                                             | 61 | 0.583 | 0.344 | -0.453 | 155 | 167 | 90  | 141.75 |
| 40 | CD8 <sup>+</sup> CD57 <sup>+</sup> cells                         | 53 | 0.397 | 0.266 | 0.218  | 119 | 129 | 202 | 142.25 |
| 41 | EM CD4 <sup>+</sup> CD57 <sup>+</sup> cells                      | 53 | 0.424 | 0.408 | 0.476  | 168 | 184 | 84  | 151    |
| 42 | EM CD4 <sup>+</sup> CD27 <sup>+</sup> CD28 <sup>+</sup> cells    | 53 | 0.408 | 0.322 | 0.259  | 140 | 157 | 174 | 152.75 |
| 43 | Lymph node involvement                                           | 61 | 0.572 | 0.343 | -0.442 | 177 | 166 | 94  | 153.5  |
| 44 | miR-9                                                            | 61 | 0.438 | 0.413 | 1.451  | 208 | 188 | 17  | 155.25 |
| 45 | EM CD4 <sup>+</sup> CD27 <sup>+</sup> cells                      | 53 | 0.410 | 0.332 | 0.256  | 142 | 162 | 176 | 155.5  |
| 46 | CD8 <sup>+</sup> CD27 <sup>+</sup> CD28 <sup>-</sup> cells       | 53 | 0.407 | 0.312 | 0.221  | 138 | 148 | 198 | 155.5  |
| 47 | Intermediate monocytes                                           | 53 | 0.604 | 0.258 | -0.122 | 114 | 123 | 285 | 159    |
| 48 | B-cells                                                          | 53 | 0.595 | 0.303 | -0.193 | 135 | 145 | 230 | 161.25 |
| 49 | miR-155                                                          | 61 | 0.430 | 0.426 | 0.421  | 186 | 192 | 99  | 165.75 |
| 50 | Naive CD8 <sup>+</sup> CD57 <sup>+</sup> cells                   | 53 | 0.388 | 0.222 | 0.036  | 98  | 111 | 359 | 166.5  |
| 51 | IL12p70                                                          | 61 | 0.564 | 0.466 | -0.554 | 198 | 210 | 61  | 166.75 |
| 52 | Class-switched memory B-cells                                    | 53 | 0.415 | 0.353 | 0.198  | 152 | 172 | 224 | 175    |
| 53 | CD4 <sup>+</sup> CD57 <sup>+</sup> cells                         | 53 | 0.407 | 0.312 | 0.125  | 137 | 147 | 284 | 176.25 |
| 54 | CRP                                                              | 61 | 0.571 | 0.421 | -0.271 | 180 | 189 | 166 | 178.75 |
| 55 | MCP-1                                                            | 61 | 0.588 | 0.315 | -0.133 | 146 | 150 | 279 | 180.25 |
| 56 | IL-27                                                            | 61 | 0.564 | 0.461 | -0.317 | 194 | 205 | 144 | 184.25 |
| 57 | CD8 <sup>+</sup> CD28 <sup>+</sup> cells                         | 53 | 0.588 | 0.342 | -0.130 | 145 | 165 | 282 | 184.25 |
| 58 | IL-17F                                                           | 61 | 0.464 | 0.398 | 1.595  | 274 | 182 | 13  | 185.75 |
| 59 | Tumor size                                                       | 61 | 0.575 | 0.384 | -0.182 | 169 | 177 | 234 | 187.25 |
| 60 | CD4/CD8 ratio                                                    | 53 | 0.563 | 0.493 | -0.336 | 200 | 218 | 132 | 187.5  |
| 61 | Naive CD4 <sup>+</sup> CD27 <sup>+</sup> CD28 <sup>-</sup> cells | 53 | 0.397 | 0.263 | 0.008  | 118 | 127 | 394 | 189.25 |
| 62 | miR-92a                                                          | 61 | 0.434 | 0.451 | 0.255  | 190 | 202 | 177 | 189.75 |
| 63 | Tregs                                                            | 53 | 0.571 | 0.437 | -0.208 | 178 | 198 | 217 | 192.75 |
| 64 | PD-1                                                             | 61 | 0.457 | 0.627 | -0.785 | 260 | 264 | 34  | 204.5  |
| 65 | NK-cells                                                         | 53 | 0.570 | 0.454 | -0.150 | 184 | 203 | 261 | 208    |
| 66 | miR-326                                                          | 61 | 0.561 | 0.412 | 0.194  | 209 | 187 | 229 | 208.5  |
| 67 | Free active TGF- $\beta$ 1                                       | 61 | 0.522 | 0.431 |        | 321 | 196 | 3   | 210.25 |
| 68 | Naive CD4 <sup>+</sup> CD28 <sup>+</sup> cells                   | 53 | 0.564 | 0.486 | -0.181 | 196 | 214 | 237 | 210.75 |
| 69 | TNF- $\alpha$                                                    | 61 | 0.544 | 0.615 | -0.489 | 253 | 262 | 77  | 211.25 |
| 70 | T-cell <i>P16<sup>NK4a</sup></i>                                 | 41 | 0.456 | 0.680 | -0.490 | 255 | 279 | 76  | 216.25 |
| 71 | EM CD4 <sup>+</sup> cells                                        | 53 | 0.441 | 0.525 | 0.208  | 219 | 228 | 218 | 221    |
| 72 | PD-L1                                                            | 61 | 0.449 | 0.563 | 0.270  | 238 | 244 | 168 | 222    |
| 73 | Memory Tregs                                                     | 53 | 0.436 | 0.491 | 0.112  | 197 | 215 | 293 | 225.5  |
| 74 | IGF-1                                                            | 61 | 0.438 | 0.481 | 0.097  | 202 | 213 | 300 | 229.25 |
| 75 | Naive CD4 <sup>+</sup> cells                                     | 53 | 0.559 | 0.529 | -0.162 | 220 | 229 | 253 | 230.5  |
| 76 | Naive CD4 <sup>+</sup> CD27 <sup>+</sup> CD28 <sup>+</sup> cells | 53 | 0.557 | 0.543 | -0.177 | 225 | 237 | 240 | 231.75 |
| 77 | Naive B-cells                                                    | 53 | 0.562 | 0.503 | -0.111 | 205 | 224 | 294 | 232    |
| 78 | miR-21                                                           | 61 | 0.451 | 0.575 | 0.221  | 243 | 250 | 197 | 233.25 |
| 79 | EM CD8 <sup>+</sup> cells                                        | 53 | 0.559 | 0.529 | -0.143 | 221 | 230 | 267 | 234.75 |
| 80 | Naive CD4 <sup>+</sup> CD27 <sup>+</sup> cells                   | 53 | 0.557 | 0.543 | -0.148 | 224 | 236 | 263 | 236.75 |

|     |                                                               |    |       |       |        |     |     |     |        |
|-----|---------------------------------------------------------------|----|-------|-------|--------|-----|-----|-----|--------|
| 81  | Classical monocytes                                           | 53 | 0.434 | 0.478 | 0.012  | 191 | 212 | 388 | 245.5  |
| 82  | PD-L2                                                         | 61 | 0.555 | 0.534 | -0.104 | 227 | 233 | 298 | 246.25 |
| 83  | TEMRA CD4 <sup>+</sup> CD28 <sup>+</sup> cells                | 53 | 0.456 | 0.639 | 0.210  | 254 | 266 | 214 | 247    |
| 84  | IL-8                                                          | 61 | 0.559 | 0.497 | -0.061 | 217 | 221 | 336 | 247.75 |
| 85  | TEMRA CD4 <sup>+</sup> cells                                  | 53 | 0.438 | 0.503 | 0.030  | 204 | 223 | 368 | 249.75 |
| 86  | Naive Tregs                                                   | 53 | 0.559 | 0.529 | -0.046 | 222 | 231 | 350 | 256.25 |
| 87  | CM CD8 <sup>+</sup> cells                                     | 53 | 0.532 | 0.732 | -0.278 | 284 | 298 | 163 | 257.25 |
| 88  | sCD27                                                         | 61 | 0.538 | 0.673 | -0.205 | 267 | 276 | 220 | 257.5  |
| 89  | miR-19b                                                       | 61 | 0.451 | 0.575 | 0.095  | 242 | 249 | 301 | 258.5  |
| 90  | IL-1 $\beta$                                                  | 61 | 0.523 | 0.795 | -0.373 | 314 | 316 | 114 | 264.5  |
| 91  | EM CD8 <sup>+</sup> CD28 <sup>+</sup> cells                   | 53 | 0.542 | 0.654 | -0.142 | 262 | 270 | 270 | 266    |
| 92  | IP-10                                                         | 61 | 0.537 | 0.675 | -0.143 | 271 | 278 | 265 | 271.25 |
| 93  | CD56 <sup>dim</sup> CD16 <sup>+</sup> NK-cells                | 53 | 0.451 | 0.597 | 0.031  | 241 | 254 | 366 | 275.5  |
| 94  | EM CD8 <sup>+</sup> CD27 <sup>-</sup> CD28 <sup>-</sup> cells | 53 | 0.460 | 0.664 | -0.067 | 263 | 273 | 328 | 281.75 |
| 95  | CD4 <sup>+</sup> cells                                        | 53 | 0.537 | 0.697 | -0.083 | 272 | 282 | 312 | 284.5  |
| 96  | Non-classical monocytes                                       | 53 | 0.548 | 0.611 | 0.006  | 244 | 260 | 396 | 286    |
| 97  | CM CD8 <sup>+</sup> CD27 <sup>+</sup> CD28 <sup>+</sup> cells | 53 | 0.520 | 0.834 | -0.273 | 325 | 330 | 165 | 286.25 |
| 98  | Plasmacytoid dendritic cells                                  | 53 | 0.516 | 0.872 | -0.334 | 338 | 341 | 134 | 287.75 |
| 99  | CM CD8 <sup>+</sup> CD27 <sup>+</sup> cells                   | 53 | 0.518 | 0.848 | -0.293 | 330 | 335 | 156 | 287.75 |
| 100 | Myeloid dendritic cells                                       | 53 | 0.472 | 0.762 | 0.143  | 296 | 308 | 268 | 292    |
| 101 | EM CD4 <sup>+</sup> CD28 <sup>+</sup> cells                   | 53 | 0.471 | 0.757 | 0.131  | 292 | 307 | 281 | 293    |
| 102 | CD56 <sup>bright</sup> CD16 <sup>-</sup> NK-cells             | 53 | 0.466 | 0.716 | 0.061  | 277 | 290 | 335 | 294.75 |
| 103 | EM CD8 <sup>+</sup> CD27 <sup>+</sup> CD28 <sup>+</sup> cells | 53 | 0.469 | 0.742 | -0.091 | 288 | 303 | 303 | 295.5  |
| 104 | CM CD8 <sup>+</sup> CD57 <sup>+</sup> cells                   | 53 | 0.492 | 0.936 | -0.386 | 363 | 365 | 111 | 300.5  |
| 105 | LAG-3                                                         | 61 | 0.474 | 0.772 | -0.134 | 307 | 311 | 277 | 300.5  |
| 106 | Naive CD4 <sup>+</sup> CD57 <sup>+</sup> cells                | 53 | 0.465 | 0.709 | -0.025 | 275 | 288 | 374 | 303    |
| 107 | CD8 <sup>+</sup> CD27 <sup>+</sup> cells                      | 53 | 0.529 | 0.755 | -0.068 | 293 | 306 | 326 | 304.5  |
| 108 | CD4 <sup>+</sup> CD27 <sup>+</sup> CD28 <sup>+</sup> cells    | 53 | 0.535 | 0.712 | -0.021 | 276 | 289 | 380 | 305.25 |
| 109 | CTLA-4                                                        | 61 | 0.477 | 0.687 | 0.076  | 315 | 281 | 319 | 307.5  |
| 110 | CD3 <sup>+</sup> cells                                        | 53 | 0.469 | 0.739 | 0.041  | 289 | 301 | 354 | 308.25 |
| 111 | CM CD8 <sup>+</sup> CD28 <sup>+</sup> cells                   | 53 | 0.512 | 0.904 | -0.257 | 352 | 356 | 175 | 308.75 |
| 112 | EM CD8 <sup>+</sup> CD27 <sup>+</sup> cells                   | 53 | 0.478 | 0.817 | -0.135 | 318 | 323 | 276 | 308.75 |
| 113 | miR-181a                                                      | 61 | 0.531 | 0.725 | -0.021 | 287 | 293 | 378 | 311.25 |
| 114 | miR-19a                                                       | 61 | 0.473 | 0.763 | 0.065  | 304 | 310 | 331 | 312.25 |
| 115 | IL-10                                                         | 61 | 0.514 | 0.880 | -0.199 | 343 | 347 | 223 | 314    |
| 116 | Non-switched memory B-cells                                   | 53 | 0.467 | 0.727 | 0.001  | 281 | 295 | 400 | 314.25 |
| 117 | CM CD4 <sup>+</sup> CD57 <sup>+</sup> cells                   | 53 | 0.471 | 0.754 | 0.002  | 291 | 305 | 399 | 321.5  |
| 118 | CM CD4 <sup>+</sup> CD28 <sup>+</sup> cells                   | 53 | 0.520 | 0.834 | -0.082 | 324 | 329 | 314 | 322.75 |
| 119 | CM CD8 <sup>+</sup> CD27 <sup>-</sup> CD28 <sup>-</sup> cells | 53 | 0.500 | 1.000 | -0.431 | 401 | 401 | 97  | 325    |
| 120 | miR-18a                                                       | 61 | 0.479 | 0.815 | 0.058  | 322 | 322 | 338 | 326    |
| 121 | CD8 <sup>+</sup> CD27 <sup>+</sup> CD28 <sup>+</sup> cells    | 53 | 0.520 | 0.832 | -0.066 | 326 | 328 | 330 | 327.5  |
| 122 | CM CD4 <sup>+</sup> cells                                     | 53 | 0.516 | 0.865 | -0.084 | 337 | 338 | 310 | 330.5  |
| 123 | CD4 <sup>+</sup> CD27 <sup>+</sup> cells                      | 53 | 0.524 | 0.801 | -0.008 | 312 | 318 | 393 | 333.75 |
| 124 | miR-17                                                        | 61 | 0.488 | 0.900 | 0.122  | 354 | 354 | 286 | 337    |
| 125 | CD4 <sup>+</sup> Tregs                                        | 53 | 0.518 | 0.848 | 0.040  | 331 | 334 | 356 | 338    |

|     |                                                                  |    |       |       |        |     |     |     |        |
|-----|------------------------------------------------------------------|----|-------|-------|--------|-----|-----|-----|--------|
| 126 | Naive CD8 <sup>+</sup> cells                                     | 53 | 0.509 | 0.929 | -0.079 | 360 | 362 | 316 | 349.5  |
| 127 | EM CD8 <sup>+</sup> CD57 <sup>+</sup> cells                      | 53 | 0.487 | 0.897 | -0.039 | 348 | 352 | 358 | 351.5  |
| 128 | Naive CD8 <sup>+</sup> CD28 <sup>+</sup> cells                   | 53 | 0.507 | 0.944 | -0.084 | 369 | 372 | 311 | 355.25 |
| 129 | Naive CD8 <sup>+</sup> CD27 <sup>+</sup> cells                   | 53 | 0.502 | 0.992 | -0.129 | 392 | 391 | 283 | 364.5  |
| 130 | TEMRA CD8 <sup>+</sup> CD28 <sup>+</sup> cells                   | 53 | 0.505 | 0.968 | -0.067 | 382 | 383 | 329 | 369    |
| 131 | Naive CD8 <sup>+</sup> CD27 <sup>+</sup> CD28 <sup>+</sup> cells | 53 | 0.500 | 1.000 | -0.117 | 402 | 402 | 291 | 374.25 |
| 132 | CM CD4 <sup>+</sup> CD27 <sup>+</sup> cells                      | 53 | 0.502 | 0.992 | -0.053 | 391 | 392 | 341 | 378.75 |
| 133 | miR-146a                                                         | 61 | 0.503 | 0.980 | -0.045 | 389 | 389 | 351 | 379.5  |
| 134 | CM CD4 <sup>+</sup> CD27 <sup>+</sup> CD28 <sup>+</sup> cells    | 53 | 0.499 | 1.000 | -0.051 | 394 | 394 | 342 | 381    |

#### INTERMEDIATE CD3 INFILTRATION

|    |                                                                  |    |       |       |        |     |     |     |        |
|----|------------------------------------------------------------------|----|-------|-------|--------|-----|-----|-----|--------|
| 1  | NK-cells                                                         | 53 | 0.304 | 0.014 | 0.502  | 16  | 9   | 73  | 28.5   |
| 2  | CD86                                                             | 61 | 0.322 | 0.016 | 0.533  | 29  | 12  | 69  | 34.75  |
| 3  | T-cell <i>P16<sup>INK4a</sup></i>                                | 41 | 0.341 | 0.084 | 1.336  | 38  | 46  | 18  | 35     |
| 4  | CM CD8 <sup>+</sup> CD27 <sup>+</sup> CD28 <sup>+</sup> cells    | 53 | 0.673 | 0.031 | -0.575 | 32  | 22  | 57  | 35.75  |
| 5  | CM CD8 <sup>+</sup> CD28 <sup>+</sup> cells                      | 53 | 0.676 | 0.028 | -0.542 | 30  | 19  | 67  | 36.5   |
| 6  | CM CD8 <sup>+</sup> CD27 <sup>+</sup> cells                      | 53 | 0.669 | 0.036 | -0.532 | 35  | 30  | 70  | 42.5   |
| 7  | CM CD8 <sup>+</sup> cells                                        | 53 | 0.669 | 0.036 | -0.493 | 34  | 27  | 75  | 42.5   |
| 8  | Lymph node involvement                                           | 61 | 0.361 | 0.032 | 0.815  | 59  | 23  | 32  | 43.25  |
| 9  | CM CD4 <sup>+</sup> CD27 <sup>+</sup> CD28 <sup>+</sup> cells    | 53 | 0.650 | 0.063 | -0.482 | 44  | 39  | 82  | 52.25  |
| 10 | CM CD4 <sup>+</sup> cells                                        | 53 | 0.649 | 0.065 | -0.488 | 46  | 40  | 78  | 52.5   |
| 11 | miR-92a                                                          | 61 | 0.649 | 0.046 | -0.456 | 45  | 34  | 88  | 53     |
| 12 | CM CD4 <sup>+</sup> CD27 <sup>+</sup> cells                      | 53 | 0.649 | 0.065 | -0.481 | 47  | 41  | 83  | 54.5   |
| 13 | Hematopoietic stem cells                                         | 53 | 0.356 | 0.074 | 0.540  | 54  | 43  | 68  | 54.75  |
| 14 | CM CD4 <sup>+</sup> CD28 <sup>+</sup> cells                      | 53 | 0.646 | 0.070 | -0.484 | 52  | 42  | 81  | 56.75  |
| 15 | PD-1                                                             | 61 | 0.389 | 0.139 | 1.564  | 101 | 79  | 14  | 73.75  |
| 16 | Naive CD4 <sup>+</sup> CD28 <sup>+</sup> cells                   | 53 | 0.364 | 0.091 | 0.348  | 63  | 49  | 126 | 75.25  |
| 17 | Naive CD4 <sup>+</sup> cells                                     | 53 | 0.367 | 0.100 | 0.323  | 70  | 56  | 140 | 84     |
| 18 | sCD27                                                            | 61 | 0.627 | 0.090 | -0.324 | 77  | 48  | 139 | 85.25  |
| 19 | Naive CD4 <sup>+</sup> CD27 <sup>+</sup> CD28 <sup>+</sup> cells | 53 | 0.374 | 0.120 | 0.349  | 79  | 68  | 124 | 87.5   |
| 20 | PD-L1                                                            | 61 | 0.382 | 0.114 | 0.369  | 88  | 64  | 116 | 89     |
| 21 | CRP                                                              | 61 | 0.615 | 0.125 | -0.428 | 94  | 72  | 98  | 89.5   |
| 22 | Naive CD4 <sup>+</sup> CD27 <sup>+</sup> cells                   | 53 | 0.374 | 0.120 | 0.322  | 78  | 67  | 141 | 91     |
| 23 | miR-150                                                          | 61 | 0.607 | 0.153 | -0.526 | 106 | 84  | 71  | 91.75  |
| 24 | EM CD8 <sup>+</sup> CD27 <sup>+</sup> CD28 <sup>+</sup> cells    | 53 | 0.639 | 0.086 | -0.217 | 62  | 47  | 203 | 93.5   |
| 25 | CM CD4 <sup>+</sup> CD57 <sup>+</sup> cells                      | 53 | 0.606 | 0.187 | -0.545 | 107 | 97  | 66  | 94.25  |
| 26 | miR-155                                                          | 61 | 0.603 | 0.168 | -0.573 | 116 | 90  | 58  | 95     |
| 27 | EM CD8 <sup>+</sup> CD27 <sup>+</sup> cells                      | 53 | 0.633 | 0.099 | -0.230 | 69  | 54  | 191 | 95.75  |
| 28 | Gal-9                                                            | 61 | 0.377 | 0.102 | 0.271  | 83  | 58  | 167 | 97.75  |
| 29 | miR-223                                                          | 61 | 0.611 | 0.137 | -0.349 | 99  | 76  | 123 | 99.25  |
| 30 | Naive CD8 <sup>+</sup> CD57 <sup>+</sup> cells                   | 53 | 0.599 | 0.222 | -0.585 | 124 | 112 | 55  | 103.75 |
| 31 | CD4 <sup>+</sup> Tregs                                           | 53 | 0.606 | 0.190 | -0.361 | 110 | 101 | 120 | 110.25 |
| 32 | CTLA-4                                                           | 61 | 0.570 | 0.149 | -1.717 | 183 | 81  | 9   | 114    |
| 33 | CM CD4 <sup>+</sup> CD27 <sup>+</sup> CD28 <sup>+</sup> cells    | 53 | 0.581 | 0.297 | -1.524 | 161 | 140 | 15  | 119.25 |
| 34 | Tumor grade                                                      | 61 | 0.613 | 0.074 | -0.148 | 96  | 44  | 262 | 124.5  |
| 35 | Naive CD8 <sup>+</sup> CD27 <sup>+</sup> CD28 <sup>+</sup> cells | 53 | 0.589 | 0.273 | -0.344 | 143 | 135 | 129 | 137.5  |

|    |                                                               |    |       |       |        |     |     |     |        |
|----|---------------------------------------------------------------|----|-------|-------|--------|-----|-----|-----|--------|
| 36 | TEMRA CD8 <sup>+</sup> CD28 <sup>+</sup> cells                | 53 | 0.418 | 0.310 | 0.307  | 156 | 146 | 147 | 151.25 |
| 37 | EM CD4 <sup>+</sup> CD27 <sup>-</sup> CD28 <sup>-</sup> cells | 53 | 0.562 | 0.444 | -1.316 | 206 | 200 | 19  | 157.75 |
| 38 | miR-181a                                                      | 61 | 0.573 | 0.330 | -0.348 | 175 | 160 | 125 | 158.75 |
| 39 | EM CD4 <sup>+</sup> cells                                     | 53 | 0.581 | 0.314 | -0.260 | 159 | 149 | 173 | 160    |
| 40 | Free active TGF-β1                                            | 61 | 0.468 | 0.168 |        | 283 | 89  | 1   | 164    |
| 41 | miR-424                                                       | 61 | 0.425 | 0.316 | 0.252  | 171 | 151 | 181 | 168.5  |
| 42 | IL-27                                                         | 61 | 0.427 | 0.333 | 0.254  | 176 | 163 | 179 | 173.5  |
| 43 | miR-19a                                                       | 61 | 0.575 | 0.316 | -0.211 | 170 | 152 | 211 | 175.75 |
| 44 | CM CD8 <sup>+</sup> CD27 <sup>-</sup> CD28 <sup>-</sup> cells | 53 | 0.597 | 0.229 | -0.062 | 127 | 116 | 334 | 176    |
| 45 | CM CD8 <sup>+</sup> CD57 <sup>+</sup> cells                   | 53 | 0.599 | 0.222 | -0.022 | 123 | 110 | 376 | 183    |
| 46 | miR-17                                                        | 61 | 0.569 | 0.356 | -0.227 | 187 | 173 | 192 | 184.75 |
| 47 | IL-1β                                                         | 61 | 0.442 | 0.444 | 0.412  | 223 | 201 | 101 | 187    |
| 48 | EM CD4 <sup>+</sup> CD27 <sup>+</sup> cells                   | 53 | 0.570 | 0.391 | -0.213 | 182 | 180 | 208 | 188    |
| 49 | Age                                                           | 61 | 0.416 | 0.260 | 0.070  | 153 | 125 | 324 | 188.75 |
| 50 | PD-L2                                                         | 61 | 0.580 | 0.291 | -0.122 | 165 | 138 | 288 | 189    |
| 51 | IFN-γ                                                         | 61 | 0.438 | 0.410 | 0.288  | 207 | 185 | 158 | 189.25 |
| 52 | CD8 <sup>+</sup> cells                                        | 53 | 0.420 | 0.326 | 0.140  | 163 | 159 | 272 | 189.25 |
| 53 | Tregs                                                         | 53 | 0.563 | 0.438 | -0.286 | 201 | 199 | 160 | 190.25 |
| 54 | EM CD4 <sup>+</sup> CD27 <sup>+</sup> CD28 <sup>+</sup> cells | 53 | 0.566 | 0.421 | -0.214 | 192 | 190 | 206 | 195    |
| 55 | IL-1α                                                         | 61 | 0.425 | 0.319 | 0.102  | 172 | 156 | 299 | 199.75 |
| 56 | TEMRA CD4 <sup>+</sup> CD28 <sup>+</sup> cells                | 53 | 0.440 | 0.463 | 0.243  | 212 | 207 | 184 | 203.75 |
| 57 | Intermediate monocytes                                        | 53 | 0.560 | 0.463 | -0.233 | 214 | 208 | 190 | 206.5  |
| 58 | EM CD4 <sup>+</sup> CD57 <sup>+</sup> cells                   | 53 | 0.537 | 0.650 | -1.127 | 269 | 268 | 22  | 207    |
| 59 | miR-21                                                        | 61 | 0.555 | 0.462 | -0.262 | 226 | 206 | 171 | 207.25 |
| 60 | EM CD8 <sup>+</sup> cells                                     | 53 | 0.567 | 0.411 | -0.138 | 188 | 186 | 273 | 208.75 |
| 61 | MCP-1                                                         | 61 | 0.571 | 0.345 | -0.088 | 181 | 168 | 305 | 208.75 |
| 62 | Class-switched memory B-cells                                 | 53 | 0.564 | 0.428 | -0.153 | 195 | 193 | 259 | 210.5  |
| 63 | IL12p70                                                       | 61 | 0.458 | 0.573 | 0.485  | 261 | 248 | 79  | 212.25 |
| 64 | LAG-3                                                         | 61 | 0.441 | 0.434 | 0.197  | 218 | 197 | 226 | 214.75 |
| 65 | TEMRA CD8 <sup>+</sup> cells                                  | 53 | 0.440 | 0.460 | 0.168  | 213 | 204 | 248 | 219.5  |
| 66 | IL-17A                                                        | 61 | 0.528 | 0.707 | -1.305 | 294 | 286 | 20  | 223.5  |
| 67 | miR-9                                                         | 61 | 0.473 | 0.675 | -1.170 | 298 | 277 | 21  | 223.5  |
| 68 | CD4/CD8 ratio                                                 | 53 | 0.551 | 0.533 | -0.219 | 239 | 232 | 200 | 227.5  |
| 69 | sCD25                                                         | 61 | 0.434 | 0.385 | 0.049  | 193 | 179 | 345 | 227.5  |
| 70 | Memory Tregs                                                  | 53 | 0.560 | 0.463 | -0.106 | 215 | 209 | 295 | 233.5  |
| 71 | Monocytes                                                     | 53 | 0.554 | 0.507 | -0.169 | 232 | 225 | 247 | 234    |
| 72 | TNF-α                                                         | 61 | 0.467 | 0.665 | 0.389  | 282 | 274 | 109 | 236.75 |
| 73 | EM CD8 <sup>+</sup> CD57 <sup>+</sup> cells                   | 53 | 0.553 | 0.519 | -0.164 | 235 | 227 | 251 | 237    |
| 74 | TEMRA CD4 <sup>+</sup> cells                                  | 53 | 0.469 | 0.704 | 0.438  | 286 | 284 | 95  | 237.75 |
| 75 | CD4 <sup>+</sup> CD57 <sup>+</sup> cells                      | 53 | 0.547 | 0.566 | -0.194 | 245 | 245 | 228 | 240.75 |
| 76 | Non-switched memory B-cells                                   | 53 | 0.457 | 0.602 | 0.222  | 258 | 257 | 195 | 242    |
| 77 | EM CD8 <sup>+</sup> CD27 <sup>-</sup> CD28 <sup>-</sup> cells | 53 | 0.537 | 0.650 | -0.249 | 270 | 269 | 183 | 248    |
| 78 | CD4 <sup>+</sup> CD27 <sup>-</sup> CD28 <sup>-</sup> cells    | 53 | 0.543 | 0.599 | -0.181 | 259 | 255 | 236 | 252.25 |
| 79 | let-7i                                                        | 61 | 0.462 | 0.614 | 0.206  | 266 | 261 | 219 | 253    |
| 80 | TEMRA CD4 <sup>+</sup> CD57 <sup>+</sup> cells                | 53 | 0.479 | 0.803 | 0.612  | 323 | 319 | 51  | 254    |

|     |                                                                  |    |       |       |        |     |     |     |        |
|-----|------------------------------------------------------------------|----|-------|-------|--------|-----|-----|-----|--------|
| 81  | miR-20a                                                          | 61 | 0.545 | 0.549 | -0.106 | 248 | 239 | 296 | 257.75 |
| 82  | IL-17F                                                           | 61 | 0.519 | 0.606 | -0.357 | 328 | 258 | 121 | 258.75 |
| 83  | miR-326                                                          | 61 | 0.449 | 0.429 | 0.031  | 240 | 194 | 367 | 260.25 |
| 84  | EM CD8 <sup>+</sup> CD28 <sup>+</sup> cells                      | 53 | 0.547 | 0.566 | -0.082 | 246 | 246 | 313 | 262.75 |
| 85  | CD8 <sup>+</sup> CD27 <sup>+</sup> cells                         | 53 | 0.544 | 0.587 | -0.088 | 251 | 252 | 304 | 264.5  |
| 86  | IL-6                                                             | 61 | 0.526 | 0.729 | 0.293  | 305 | 297 | 155 | 265.5  |
| 87  | TEMRA CD8 <sup>+</sup> CD57 <sup>+</sup> cells                   | 53 | 0.457 | 0.602 | 0.105  | 257 | 256 | 297 | 266.75 |
| 88  | TEMRA CD8 <sup>+</sup> CD27 <sup>+</sup> CD28 <sup>-</sup> cells | 53 | 0.461 | 0.630 | 0.133  | 264 | 265 | 278 | 267.75 |
| 89  | TIM-3                                                            | 61 | 0.474 | 0.736 | -0.266 | 308 | 300 | 170 | 271.5  |
| 90  | Naive CD4 <sup>+</sup> CD57 <sup>+</sup> cells                   | 53 | 0.527 | 0.742 | -0.222 | 300 | 302 | 196 | 274.5  |
| 91  | Plasmacytoid dendritic cells                                     | 53 | 0.469 | 0.708 | 0.184  | 290 | 287 | 232 | 274.75 |
| 92  | CD4 <sup>+</sup> CD28 <sup>+</sup> cells                         | 53 | 0.456 | 0.587 | 0.032  | 250 | 251 | 364 | 278.75 |
| 93  | miR-146a                                                         | 61 | 0.527 | 0.724 | -0.204 | 303 | 291 | 221 | 279.5  |
| 94  | Non-classical monocytes                                          | 53 | 0.456 | 0.590 | -0.029 | 252 | 253 | 370 | 281.75 |
| 95  | Myeloid dendritic cells                                          | 53 | 0.519 | 0.817 | -0.274 | 327 | 324 | 164 | 285.5  |
| 96  | CD8 <sup>+</sup> CD27 <sup>+</sup> CD28 <sup>+</sup> cells       | 53 | 0.531 | 0.702 | -0.087 | 285 | 283 | 306 | 289.75 |
| 97  | 4-1BB                                                            | 61 | 0.504 | 0.952 | -1.022 | 383 | 379 | 25  | 292.5  |
| 98  | TEMRA CD4 <sup>+</sup> CD27 <sup>+</sup> CD28 <sup>-</sup> cells | 53 | 0.494 | 0.950 | 0.655  | 376 | 376 | 45  | 293.25 |
| 99  | IGF-1                                                            | 61 | 0.533 | 0.662 | -0.046 | 279 | 272 | 349 | 294.75 |
| 100 | miR-195                                                          | 61 | 0.512 | 0.874 | -0.325 | 351 | 344 | 138 | 296    |
| 101 | miR-126                                                          | 61 | 0.522 | 0.773 | -0.173 | 317 | 313 | 243 | 297.5  |
| 102 | IL-10                                                            | 61 | 0.488 | 0.874 | 0.294  | 350 | 343 | 153 | 299    |
| 103 | CD56 <sup>dim</sup> CD16 <sup>+</sup> NK-cells                   | 53 | 0.536 | 0.665 | -0.013 | 273 | 275 | 387 | 302    |
| 104 | miR-18a                                                          | 61 | 0.526 | 0.729 | -0.081 | 306 | 296 | 315 | 305.75 |
| 105 | IP-10                                                            | 61 | 0.527 | 0.724 | -0.049 | 302 | 292 | 344 | 310    |
| 106 | NK-like T-cells                                                  | 53 | 0.505 | 0.957 | -0.411 | 381 | 380 | 102 | 311    |
| 107 | Naive CD4 <sup>+</sup> CD27 <sup>+</sup> CD28 <sup>-</sup> cells | 53 | 0.528 | 0.735 | 0.025  | 297 | 299 | 373 | 316.5  |
| 108 | TEMRA CD4 <sup>+</sup> CD27 <sup>+</sup> cells                   | 53 | 0.476 | 0.776 | 0.063  | 313 | 314 | 332 | 318    |
| 109 | Naive CD8 <sup>+</sup> cells                                     | 53 | 0.486 | 0.867 | 0.162  | 341 | 340 | 254 | 319    |
| 110 | miR-19b                                                          | 61 | 0.478 | 0.773 | 0.058  | 316 | 312 | 337 | 320.25 |
| 111 | Naive Tregs                                                      | 53 | 0.473 | 0.744 | 0.021  | 301 | 304 | 379 | 321.25 |
| 112 | Naive CD8 <sup>+</sup> CD27 <sup>+</sup> cells                   | 53 | 0.492 | 0.929 | 0.224  | 365 | 363 | 193 | 321.5  |
| 113 | G8 score                                                         | 26 | 0.473 | 0.831 | 0.021  | 299 | 327 | 381 | 326.5  |
| 114 | Naive CD8 <sup>+</sup> CD28 <sup>+</sup> cells                   | 53 | 0.491 | 0.922 | 0.182  | 362 | 358 | 235 | 329.25 |
| 115 | Tumor size                                                       | 61 | 0.488 | 0.878 | -0.140 | 353 | 345 | 271 | 330.5  |
| 116 | Naive CD8 <sup>+</sup> CD27 <sup>+</sup> CD28 <sup>+</sup> cells | 53 | 0.494 | 0.951 | 0.214  | 377 | 377 | 205 | 334    |
| 117 | TEMRA CD4 <sup>+</sup> CD27 <sup>+</sup> CD28 <sup>+</sup> cells | 53 | 0.483 | 0.838 | 0.049  | 334 | 331 | 346 | 336.25 |
| 118 | Classical monocytes                                              | 53 | 0.481 | 0.825 | 0.028  | 329 | 326 | 372 | 339    |
| 119 | CD4 <sup>+</sup> cells                                           | 53 | 0.513 | 0.881 | -0.067 | 344 | 348 | 327 | 340.75 |
| 120 | EM CD4 <sup>+</sup> CD28 <sup>+</sup> cells                      | 53 | 0.513 | 0.881 | -0.062 | 345 | 349 | 333 | 343    |
| 121 | CD4 <sup>+</sup> CD27 <sup>+</sup> CD28 <sup>+</sup> cells       | 53 | 0.483 | 0.839 | 0.016  | 333 | 332 | 383 | 345.25 |
| 122 | TEMRA CD8 <sup>+</sup> CD27 <sup>+</sup> CD28 <sup>+</sup> cells | 53 | 0.514 | 0.866 | 0.036  | 342 | 339 | 361 | 346    |
| 123 | CD8 <sup>+</sup> CD57 <sup>+</sup> cells                         | 53 | 0.517 | 0.839 | -0.011 | 335 | 333 | 390 | 348.25 |
| 124 | IL-8                                                             | 61 | 0.494 | 0.937 | 0.085  | 373 | 368 | 308 | 355.5  |
| 125 | CD56 <sup>bright</sup> CD16 <sup>-</sup> NK-cells                | 53 | 0.493 | 0.936 | 0.071  | 371 | 367 | 323 | 358    |

|     |                                                            |    |       |       |        |     |     |     |        |
|-----|------------------------------------------------------------|----|-------|-------|--------|-----|-----|-----|--------|
| 126 | miR-125b                                                   | 61 | 0.494 | 0.942 | -0.073 | 375 | 370 | 321 | 360.25 |
| 127 | CD4 <sup>+</sup> CD27 <sup>+</sup> cells                   | 53 | 0.489 | 0.901 | 0.007  | 355 | 355 | 395 | 365    |
| 128 | let-7e                                                     | 61 | 0.506 | 0.937 | -0.047 | 374 | 369 | 348 | 366.25 |
| 129 | CD3 <sup>+</sup> cells                                     | 53 | 0.495 | 0.957 | 0.033  | 380 | 381 | 363 | 376    |
| 130 | B-cells                                                    | 53 | 0.500 | 1.000 | 0.077  | 399 | 399 | 318 | 378.75 |
| 131 | CD8 <sup>+</sup> CD28 <sup>+</sup> cells                   | 53 | 0.506 | 0.951 | -0.011 | 378 | 378 | 391 | 381.25 |
| 132 | CD8 <sup>+</sup> CD27 <sup>+</sup> CD28 <sup>-</sup> cells | 53 | 0.499 | 0.993 | 0.035  | 393 | 393 | 362 | 385.25 |
| 133 | TEMRA CD8 <sup>+</sup> CD27 <sup>+</sup> cells             | 53 | 0.499 | 1.000 | -0.015 | 395 | 395 | 385 | 392.5  |
| 134 | Naive B-cells                                              | 53 | 0.500 | 1.000 | -0.029 | 400 | 400 | 371 | 392.75 |

#### LOW CD3 INFILTRATION

|    |                                                                  |    |       |       |        |    |    |     |       |
|----|------------------------------------------------------------------|----|-------|-------|--------|----|----|-----|-------|
| 1  | T-cell <i>P16<sup>INK4a</sup></i>                                | 41 | 0.807 | 0.008 | -2.267 | 2  | 4  | 5   | 3.25  |
| 2  | CM CD8 <sup>+</sup> CD27 <sup>+</sup> CD28 <sup>+</sup> cells    | 53 | 0.258 | 0.007 | 0.871  | 5  | 3  | 28  | 10.25 |
| 3  | CM CD8 <sup>+</sup> cells                                        | 53 | 0.251 | 0.006 | 0.793  | 3  | 2  | 33  | 10.25 |
| 4  | CM CD8 <sup>+</sup> CD28 <sup>+</sup> cells                      | 53 | 0.262 | 0.009 | 0.826  | 6  | 6  | 31  | 12.25 |
| 5  | CM CD8 <sup>+</sup> CD27 <sup>+</sup> cells                      | 53 | 0.266 | 0.010 | 0.843  | 7  | 7  | 29  | 12.5  |
| 6  | PD-L1                                                            | 61 | 0.710 | 0.016 | -0.930 | 9  | 11 | 27  | 14    |
| 7  | CRP                                                              | 61 | 0.274 | 0.008 | 0.741  | 8  | 5  | 38  | 14.75 |
| 8  | PD-1                                                             | 61 | 0.692 | 0.027 | -1.767 | 20 | 18 | 8   | 16.5  |
| 9  | CM CD4 <sup>+</sup> cells                                        | 53 | 0.293 | 0.022 | 0.636  | 12 | 15 | 46  | 21.25 |
| 10 | sCD27                                                            | 61 | 0.291 | 0.015 | 0.578  | 11 | 10 | 56  | 22    |
| 11 | CM CD4 <sup>+</sup> CD28 <sup>+</sup> cells                      | 53 | 0.293 | 0.022 | 0.630  | 13 | 16 | 49  | 22.75 |
| 12 | TEMRA CD8 <sup>+</sup> CD57 <sup>+</sup> cells                   | 53 | 0.698 | 0.029 | -0.571 | 15 | 20 | 59  | 27.25 |
| 13 | miR-195                                                          | 61 | 0.679 | 0.039 | -1.037 | 28 | 31 | 24  | 27.75 |
| 14 | CM CD4 <sup>+</sup> CD27 <sup>+</sup> cells                      | 53 | 0.308 | 0.034 | 0.602  | 18 | 24 | 53  | 28.25 |
| 15 | CM CD4 <sup>+</sup> CD27 <sup>+</sup> CD28 <sup>+</sup> cells    | 53 | 0.309 | 0.036 | 0.602  | 21 | 29 | 52  | 30.75 |
| 16 | CD8 <sup>+</sup> cells                                           | 53 | 0.709 | 0.021 | -0.443 | 10 | 14 | 93  | 31.75 |
| 17 | NK-cells                                                         | 53 | 0.681 | 0.046 | -0.548 | 27 | 33 | 64  | 37.75 |
| 18 | TEMRA CD8 <sup>+</sup> cells                                     | 53 | 0.692 | 0.035 | -0.469 | 19 | 26 | 87  | 37.75 |
| 19 | TEMRA CD8 <sup>+</sup> CD27 <sup>+</sup> CD28 <sup>-</sup> cells | 53 | 0.670 | 0.062 | -0.548 | 33 | 38 | 65  | 42.25 |
| 20 | TEMRA CD4 <sup>+</sup> CD57 <sup>+</sup> cells                   | 53 | 0.654 | 0.092 | -0.684 | 40 | 52 | 41  | 43.25 |
| 21 | TEMRA CD4 <sup>+</sup> CD27 <sup>+</sup> CD28 <sup>-</sup> cells | 53 | 0.650 | 0.100 | -0.747 | 43 | 57 | 37  | 45    |
| 22 | Intermediate monocytes                                           | 53 | 0.319 | 0.046 | 0.392  | 26 | 32 | 106 | 47.5  |
| 23 | Tregs                                                            | 53 | 0.348 | 0.096 | 0.523  | 41 | 53 | 72  | 51.75 |
| 24 | CD4 <sup>+</sup> Tregs                                           | 53 | 0.346 | 0.092 | 0.392  | 39 | 51 | 107 | 59    |
| 25 | Tumor grade                                                      | 61 | 0.685 | 0.012 | -0.236 | 23 | 8  | 188 | 60.5  |
| 26 | NK-like T-cells                                                  | 53 | 0.636 | 0.138 | -0.677 | 65 | 77 | 42  | 62.25 |
| 27 | EM CD8 <sup>+</sup> CD27 <sup>+</sup> cells                      | 53 | 0.352 | 0.104 | 0.399  | 48 | 59 | 104 | 64.75 |
| 28 | MCP-1                                                            | 61 | 0.317 | 0.035 | 0.238  | 24 | 25 | 187 | 65    |
| 29 | PD-L2                                                            | 61 | 0.338 | 0.061 | 0.255  | 37 | 37 | 178 | 72.25 |
| 30 | Lymph node involvement                                           | 61 | 0.616 | 0.124 | -0.762 | 92 | 71 | 35  | 72.5  |
| 31 | EM CD8 <sup>+</sup> CD27 <sup>+</sup> CD28 <sup>+</sup> cells    | 53 | 0.353 | 0.109 | 0.347  | 51 | 61 | 127 | 72.5  |
| 32 | miR-125b                                                         | 61 | 0.647 | 0.091 | -0.317 | 50 | 50 | 143 | 73.25 |
| 33 | TEMRA CD4 <sup>+</sup> CD27 <sup>+</sup> cells                   | 53 | 0.635 | 0.141 | -0.473 | 67 | 80 | 85  | 74.75 |
| 34 | CD4/CD8 ratio                                                    | 53 | 0.372 | 0.161 | 0.550  | 75 | 87 | 63  | 75    |
| 35 | CD86                                                             | 61 | 0.633 | 0.126 | -0.416 | 68 | 73 | 100 | 77.25 |

|    |                                                                  |    |       |       |        |     |     |     |        |
|----|------------------------------------------------------------------|----|-------|-------|--------|-----|-----|-----|--------|
| 36 | miR-181a                                                         | 61 | 0.370 | 0.136 | 0.454  | 74  | 75  | 89  | 78     |
| 37 | EM CD8 <sup>+</sup> cells                                        | 53 | 0.355 | 0.114 | 0.301  | 53  | 63  | 151 | 80     |
| 38 | TEMRA CD4 <sup>+</sup> CD28 <sup>+</sup> cells                   | 53 | 0.621 | 0.189 | -0.587 | 85  | 99  | 54  | 80.75  |
| 39 | TEMRA CD8 <sup>+</sup> CD27 <sup>+</sup> cells                   | 53 | 0.632 | 0.149 | -0.399 | 71  | 82  | 105 | 82.25  |
| 40 | miR-92a                                                          | 61 | 0.365 | 0.121 | 0.326  | 66  | 70  | 137 | 84.75  |
| 41 | CM CD8 <sup>+</sup> CD27 <sup>+</sup> CD28 <sup>-</sup> cells    | 53 | 0.375 | 0.173 | 0.448  | 80  | 91  | 92  | 85.75  |
| 42 | TEMRA CD4 <sup>+</sup> CD27 <sup>+</sup> CD28 <sup>+</sup> cells | 53 | 0.621 | 0.186 | -0.450 | 84  | 96  | 91  | 88.75  |
| 43 | TEMRA CD8 <sup>+</sup> CD27 <sup>+</sup> CD28 <sup>+</sup> cells | 53 | 0.617 | 0.200 | -0.501 | 91  | 104 | 74  | 90     |
| 44 | CM CD4 <sup>+</sup> CD57 <sup>+</sup> cells                      | 53 | 0.393 | 0.242 | 0.623  | 105 | 118 | 50  | 94.5   |
| 45 | CM CD8 <sup>+</sup> CD57 <sup>+</sup> cells                      | 53 | 0.382 | 0.197 | 0.369  | 89  | 103 | 117 | 99.5   |
| 46 | TEMRA CD4 <sup>+</sup> cells                                     | 53 | 0.603 | 0.266 | -0.668 | 120 | 130 | 43  | 103.25 |
| 47 | EM CD4 <sup>+</sup> CD27 <sup>+</sup> CD28 <sup>-</sup> cells    | 53 | 0.596 | 0.294 | 0.829  | 129 | 139 | 30  | 106.75 |
| 48 | CTLA-4                                                           | 61 | 0.429 | 0.208 | 1.646  | 179 | 106 | 10  | 118.5  |
| 49 | Naive CD4 <sup>+</sup> CD28 <sup>+</sup> cells                   | 53 | 0.611 | 0.226 | -0.285 | 100 | 114 | 161 | 118.75 |
| 50 | Naive CD4 <sup>+</sup> cells                                     | 53 | 0.612 | 0.225 | -0.269 | 97  | 113 | 169 | 119    |
| 51 | 4-1BB                                                            | 61 | 0.576 | 0.297 | -1.459 | 167 | 141 | 16  | 122.75 |
| 52 | TEMRA CD8 <sup>+</sup> CD28 <sup>+</sup> cells                   | 53 | 0.601 | 0.272 | -0.350 | 121 | 132 | 122 | 124    |
| 53 | let-7e                                                           | 61 | 0.404 | 0.273 | 0.390  | 130 | 133 | 108 | 125.25 |
| 54 | Naive CD4 <sup>+</sup> CD27 <sup>+</sup> CD28 <sup>+</sup> cells | 53 | 0.604 | 0.258 | -0.291 | 112 | 122 | 157 | 125.75 |
| 55 | Naive CD4 <sup>+</sup> CD27 <sup>+</sup> cells                   | 53 | 0.604 | 0.258 | -0.282 | 111 | 121 | 162 | 126.25 |
| 56 | miR-20a                                                          | 61 | 0.607 | 0.218 | -0.219 | 103 | 108 | 201 | 128.75 |
| 57 | miR-9                                                            | 61 | 0.599 | 0.188 | -0.261 | 126 | 98  | 172 | 130.5  |
| 58 | TIM-3                                                            | 61 | 0.420 | 0.365 | 0.706  | 164 | 175 | 40  | 135.75 |
| 59 | EM CD8 <sup>+</sup> CD28 <sup>+</sup> cells                      | 53 | 0.397 | 0.266 | 0.235  | 117 | 128 | 189 | 137.75 |
| 60 | miR-126                                                          | 61 | 0.594 | 0.280 | -0.309 | 136 | 136 | 146 | 138.5  |
| 61 | CD8 <sup>+</sup> CD27 <sup>+</sup> CD28 <sup>-</sup> cells       | 53 | 0.595 | 0.303 | -0.286 | 132 | 142 | 159 | 141.25 |
| 62 | Non-switched memory B-cells                                      | 53 | 0.588 | 0.342 | -0.301 | 144 | 164 | 150 | 150.5  |
| 63 | LAG-3                                                            | 61 | 0.606 | 0.227 | -0.138 | 109 | 115 | 274 | 151.75 |
| 64 | IL-6                                                             | 61 | 0.382 | 0.175 | 0.023  | 90  | 93  | 375 | 162    |
| 65 | IL-17A                                                           | 61 | 0.560 | 0.492 | -1.615 | 211 | 217 | 11  | 162.5  |
| 66 | CD8 <sup>+</sup> CD28 <sup>+</sup> cells                         | 53 | 0.405 | 0.303 | 0.138  | 133 | 143 | 275 | 171    |
| 67 | miR-424                                                          | 61 | 0.419 | 0.353 | 0.215  | 160 | 171 | 204 | 173.75 |
| 68 | CD8 <sup>+</sup> CD57 <sup>+</sup> cells                         | 53 | 0.581 | 0.384 | -0.220 | 162 | 178 | 199 | 175.25 |
| 69 | CD8 <sup>+</sup> CD27 <sup>+</sup> cells                         | 53 | 0.414 | 0.348 | 0.175  | 151 | 169 | 241 | 178    |
| 70 | miR-155                                                          | 61 | 0.430 | 0.426 | 0.298  | 185 | 191 | 152 | 178.25 |
| 71 | Age                                                              | 61 | 0.413 | 0.319 | 0.142  | 147 | 154 | 269 | 179.25 |
| 72 | B-cells                                                          | 53 | 0.405 | 0.303 | 0.087  | 134 | 144 | 307 | 179.75 |
| 73 | miR-17                                                           | 61 | 0.418 | 0.348 | 0.175  | 157 | 170 | 242 | 181.5  |
| 74 | miR-19a                                                          | 61 | 0.425 | 0.393 | 0.211  | 173 | 181 | 212 | 184.75 |
| 75 | miR-19b                                                          | 61 | 0.579 | 0.366 | -0.180 | 166 | 176 | 238 | 186.5  |
| 76 | IP-10                                                            | 61 | 0.427 | 0.402 | 0.199  | 174 | 183 | 222 | 188.25 |
| 77 | Tumor size                                                       | 61 | 0.441 | 0.494 | 0.345  | 216 | 219 | 128 | 194.75 |
| 78 | Classical monocytes                                              | 53 | 0.590 | 0.332 | -0.048 | 141 | 161 | 347 | 197.5  |
| 79 | CD4 <sup>+</sup> CD27 <sup>+</sup> CD28 <sup>-</sup> cells       | 53 | 0.584 | 0.359 | 0.068  | 154 | 174 | 325 | 201.75 |
| 80 | CD4 <sup>+</sup> CD28 <sup>+</sup> cells                         | 53 | 0.408 | 0.318 | -0.012 | 139 | 153 | 389 | 205    |



|     |                                                                  |    |       |       |        |     |     |     |        |
|-----|------------------------------------------------------------------|----|-------|-------|--------|-----|-----|-----|--------|
| 81  | Free active TGF- $\beta$ 1                                       | 61 | 0.522 | 0.431 |        | 319 | 195 | 2   | 208.75 |
| 82  | Hematopoietic stem cells                                         | 53 | 0.563 | 0.491 | -0.197 | 199 | 216 | 225 | 209.75 |
| 83  | G8 score                                                         | 26 | 0.413 | 0.494 | 0.043  | 149 | 220 | 352 | 217.5  |
| 84  | EM CD8 <sup>+</sup> CD57 <sup>+</sup> cells                      | 53 | 0.445 | 0.556 | 0.240  | 228 | 240 | 186 | 220.5  |
| 85  | CD8 <sup>+</sup> CD27 <sup>+</sup> CD28 <sup>+</sup> cells       | 53 | 0.440 | 0.512 | 0.173  | 210 | 226 | 244 | 222.5  |
| 86  | Naive B-cells                                                    | 53 | 0.438 | 0.503 | 0.143  | 203 | 222 | 266 | 223.5  |
| 87  | IL-1 $\beta$                                                     | 61 | 0.554 | 0.535 | -0.211 | 230 | 234 | 213 | 226.75 |
| 88  | EM CD4 <sup>+</sup> CD57 <sup>+</sup> cells                      | 53 | 0.528 | 0.762 | 0.752  | 295 | 309 | 36  | 233.75 |
| 89  | Naive CD4 <sup>+</sup> CD27 <sup>-</sup> CD28 <sup>-</sup> cells | 53 | 0.567 | 0.467 | -0.040 | 189 | 211 | 357 | 236.5  |
| 90  | miR-146a                                                         | 61 | 0.461 | 0.657 | 0.304  | 265 | 271 | 148 | 237.25 |
| 91  | CD4 <sup>+</sup> cells                                           | 53 | 0.447 | 0.569 | 0.163  | 233 | 247 | 252 | 241.25 |
| 92  | IL-1 $\alpha$                                                    | 61 | 0.449 | 0.563 | 0.160  | 236 | 243 | 255 | 242.5  |
| 93  | miR-223                                                          | 61 | 0.446 | 0.535 | 0.122  | 231 | 235 | 287 | 246    |
| 94  | let-7i                                                           | 61 | 0.447 | 0.547 | -0.073 | 234 | 238 | 322 | 257    |
| 95  | CD56 <sup>bright</sup> CD16 <sup>-</sup> NK-cells                | 53 | 0.543 | 0.643 | -0.157 | 256 | 267 | 257 | 259    |
| 96  | IL-17F                                                           | 61 | 0.510 | 0.819 | -2.426 | 356 | 325 | 4   | 260.25 |
| 97  | EM CD4 <sup>+</sup> cells                                        | 53 | 0.454 | 0.621 | 0.115  | 247 | 263 | 292 | 262.25 |
| 98  | Monocytes                                                        | 53 | 0.555 | 0.556 | 0.041  | 229 | 241 | 355 | 263.5  |
| 99  | IL-8                                                             | 61 | 0.449 | 0.563 | -0.055 | 237 | 242 | 339 | 263.75 |
| 100 | miR-150                                                          | 61 | 0.545 | 0.609 | -0.091 | 249 | 259 | 302 | 264.75 |
| 101 | Naive CD8 <sup>+</sup> CD57 <sup>+</sup> cells                   | 53 | 0.485 | 0.880 | 0.634  | 339 | 346 | 47  | 267.75 |
| 102 | CD3 <sup>+</sup> cells                                           | 53 | 0.538 | 0.687 | -0.085 | 268 | 280 | 309 | 281.25 |
| 103 | CD4 <sup>+</sup> CD57 <sup>+</sup> cells                         | 53 | 0.533 | 0.727 | 0.119  | 280 | 294 | 290 | 286    |
| 104 | CM CD4 <sup>+</sup> CD27 <sup>-</sup> CD28 <sup>-</sup> cells    | 53 | 0.505 | 0.958 | 1.602  | 379 | 382 | 12  | 288    |
| 105 | Gal-9                                                            | 61 | 0.522 | 0.810 | 0.212  | 320 | 321 | 210 | 292.75 |
| 106 | Naive CD8 <sup>+</sup> CD27 <sup>-</sup> CD28 <sup>-</sup> cells | 53 | 0.516 | 0.864 | 0.242  | 336 | 337 | 185 | 298.5  |
| 107 | IL-27                                                            | 61 | 0.533 | 0.706 | -0.042 | 278 | 285 | 353 | 298.5  |
| 108 | miR-21                                                           | 61 | 0.475 | 0.776 | 0.120  | 309 | 315 | 289 | 305.5  |
| 109 | EM CD8 <sup>+</sup> CD27 <sup>-</sup> CD28 <sup>-</sup> cells    | 53 | 0.493 | 0.944 | 0.362  | 367 | 371 | 118 | 305.75 |
| 110 | Plasmacytoid dendritic cells                                     | 53 | 0.524 | 0.801 | 0.078  | 311 | 317 | 317 | 314    |
| 111 | miR-326                                                          | 61 | 0.507 | 0.929 | -0.254 | 370 | 364 | 180 | 321    |
| 112 | sCD25                                                            | 61 | 0.491 | 0.927 | 0.213  | 361 | 359 | 209 | 322.5  |
| 113 | Naive Tregs                                                      | 53 | 0.476 | 0.803 | 0.019  | 310 | 320 | 382 | 330.5  |
| 114 | Naive CD8 <sup>+</sup> CD27 <sup>+</sup> cells                   | 53 | 0.508 | 0.936 | -0.167 | 364 | 366 | 249 | 335.75 |
| 115 | Naive CD4 <sup>+</sup> CD57 <sup>+</sup> cells                   | 53 | 0.500 | 1.000 | 0.293  | 397 | 397 | 154 | 336.25 |
| 116 | Naive CD8 <sup>+</sup> cells                                     | 53 | 0.509 | 0.929 | -0.132 | 358 | 360 | 280 | 339    |
| 117 | Naive CD8 <sup>+</sup> CD27 <sup>+</sup> CD28 <sup>+</sup> cells | 53 | 0.507 | 0.944 | -0.165 | 368 | 374 | 250 | 340    |
| 118 | IGF-1                                                            | 61 | 0.517 | 0.849 | -0.036 | 332 | 336 | 360 | 340    |
| 119 | miR-18a                                                          | 61 | 0.486 | 0.874 | 0.050  | 340 | 342 | 343 | 341.25 |
| 120 | IL-10                                                            | 61 | 0.503 | 0.980 | -0.210 | 387 | 388 | 215 | 344.25 |
| 121 | IL12p70                                                          | 61 | 0.493 | 0.947 | -0.151 | 372 | 375 | 260 | 344.75 |
| 122 | Myeloid dendritic cells                                          | 53 | 0.504 | 0.976 | 0.197  | 386 | 384 | 227 | 345.75 |
| 123 | EM CD4 <sup>+</sup> CD28 <sup>+</sup> cells                      | 53 | 0.513 | 0.897 | -0.055 | 349 | 353 | 340 | 347.75 |
| 124 | Naive CD8 <sup>+</sup> CD28 <sup>+</sup> cells                   | 53 | 0.504 | 0.976 | -0.155 | 384 | 385 | 258 | 352.75 |
| 125 | Memory Tregs                                                     | 53 | 0.487 | 0.897 | 0.021  | 347 | 351 | 377 | 355.5  |

|     |                                                               |    |       |       |        |     |     |     |        |
|-----|---------------------------------------------------------------|----|-------|-------|--------|-----|-----|-----|--------|
| 126 | CD4 <sup>+</sup> CD27 <sup>+</sup> CD28 <sup>+</sup> cells    | 53 | 0.487 | 0.897 | 0.000  | 346 | 350 | 401 | 360.75 |
| 127 | Non-classical monocytes                                       | 53 | 0.509 | 0.929 | 0.032  | 359 | 361 | 365 | 361    |
| 128 | CD4 <sup>+</sup> CD27 <sup>+</sup> cells                      | 53 | 0.490 | 0.920 | 0.000  | 357 | 357 | 402 | 368.25 |
| 129 | EM CD4 <sup>+</sup> CD27 <sup>+</sup> CD28 <sup>+</sup> cells | 53 | 0.507 | 0.944 | 0.002  | 366 | 373 | 398 | 375.75 |
| 130 | TNF- $\alpha$                                                 | 61 | 0.500 | 1.000 | -0.074 | 398 | 398 | 320 | 378.5  |
| 131 | CD56 <sup>dim</sup> CD16 <sup>+</sup> NK-cells                | 53 | 0.504 | 0.976 | -0.016 | 385 | 386 | 384 | 385    |
| 132 | IFN- $\gamma$                                                 | 61 | 0.497 | 0.980 | 0.014  | 388 | 387 | 386 | 387.25 |
| 133 | Class-switched memory B-cells                                 | 53 | 0.503 | 0.984 | -0.009 | 390 | 390 | 392 | 390.5  |
| 134 | EM CD4 <sup>+</sup> CD27 <sup>+</sup> cells                   | 53 | 0.500 | 1.000 | 0.005  | 396 | 396 | 397 | 396.25 |
