# Supplementary material for: Blood Immunosenescence Signatures Reflecting Age, Frailty and Tumor Immune Infiltrate in Patients with Early Luminal Breast Cancer
Source: MDPI journal article supplement (doi:10.3390/cancers13092185), 2021-05-02
Supplement: s1 [file s1]

*Table S1: Individual performances of biomarkers for the classification of patients in the two different age groups: young: 35-45/55-65 years and old: ≥70 years. The table reports the number of patients (N) for which the biomarkers could be measured, as well as the area under the curve (AUC) via receiver operating characteristics (ROC), P-value (Wilcox rank-sum test) and log fold change (FC) for each biomarker. The log FC compared case vs. control. A positive log FC indicates that the measurement is higher than its reference while a negative measurement indicates that is smaller. For each of these statistics ranking scores were computed reflecting the ability of the statistic to classify the patient in the correct age group. The final score combines the 3 scores, where AUC weighted double. The biomarkers are ranked based on their final score.*

|    | Blood markers                                                    | N  | AUC   | P-value | log FC | AUC score | P-value score | log FC score | Final score |
|----|------------------------------------------------------------------|----|-------|---------|--------|-----------|---------------|--------------|-------------|
| 1  | miR-326                                                          | 65 | 0.887 | < 0.001 |        | 1         | 1             | 1            | 1.00        |
| 2  | miR-155                                                          | 65 | 0.765 | < 0.001 | -1.011 | 5         | 6             | 8            | 6.00        |
| 3  | miR-18a                                                          | 65 | 0.218 | < 0.001 | 0.633  | 3         | 3             | 18           | 6.75        |
| 4  | T-cell P16 <sup>INK4a</sup>                                      | 43 | 0.760 | 0.004   | -1.870 | 7         | 9             | 6            | 7.25        |
| 5  | IL-1α                                                            | 65 | 0.797 | < 0.001 | -0.522 | 2         | 2             | 24           | 7.50        |
| 6  | miR-19b                                                          | 65 | 0.222 | < 0.001 | 0.617  | 4         | 4             | 20           | 8.00        |
| 7  | Gal-9                                                            | 65 | 0.762 | < 0.001 | -0.614 | 6         | 5             | 21           | 9.50        |
| 8  | Naive CD8 <sup>+</sup> CD27 <sup>+</sup> cells                   | 57 | 0.291 | 0.007   | 0.850  | 10        | 10            | 11           | 10.25       |
| 9  | Naive CD8 <sup>+</sup> CD27 <sup>+</sup> CD28 <sup>+</sup> cells | 57 | 0.297 | 0.008   | 0.840  | 11        | 11            | 12           | 11.25       |
| 10 | IL-17A                                                           | 65 | 0.313 | 0.010   | 2.194  | 15        | 12            | 5            | 11.75       |
| 11 | IP-10                                                            | 65 | 0.758 | < 0.001 | -0.427 | 8         | 7             | 29           | 13.00       |
| 12 | Naive CD8 <sup>+</sup> cells                                     | 57 | 0.308 | 0.013   | 0.742  | 13        | 14            | 15           | 13.75       |
| 13 | Naive CD8 <sup>+</sup> CD28 <sup>+</sup> cells                   | 57 | 0.308 | 0.013   | 0.784  | 14        | 15            | 14           | 14.25       |
| 14 | IGF-1                                                            | 65 | 0.286 | 0.003   | 0.372  | 9         | 8             | 35           | 15.25       |
| 15 | CD8 <sup>+</sup> CD27 <sup>+</sup> cells                         | 57 | 0.300 | 0.010   | 0.461  | 12        | 13            | 25           | 15.50       |
| 16 | miR-195                                                          | 65 | 0.333 | 0.021   | 0.638  | 17        | 18            | 17           | 17.25       |
| 17 | miR-9                                                            | 65 | 0.356 | 0.022   | 1.363  | 23        | 19            | 7            | 18.00       |
| 18 | 4-1BB                                                            | 65 | 0.361 | 0.019   | 2.417  | 28        | 16            | 4            | 19.00       |
| 19 | CD8 <sup>+</sup> CD27 <sup>+</sup> CD28 <sup>+</sup> cells       | 57 | 0.319 | 0.020   | 0.444  | 16        | 17            | 27           | 19.00       |
| 20 | CD56 <sup>bright</sup> CD16 <sup>-</sup> NK-cells                | 57 | 0.340 | 0.040   | 0.595  | 18        | 21            | 22           | 19.75       |
| 21 | miR-19a                                                          | 65 | 0.357 | 0.049   | 0.389  | 24        | 23            | 32           | 25.75       |
| 22 | miR-20a                                                          | 65 | 0.342 | 0.029   | 0.283  | 19        | 20            | 50           | 27.00       |
| 23 | miR-125b                                                         | 65 | 0.358 | 0.050   | 0.348  | 25        | 24            | 36           | 27.50       |
| 24 | Intermediate monocytes                                           | 57 | 0.646 | 0.059   | -0.284 | 22        | 27            | 49           | 30.00       |
| 25 | EM CD8 <sup>+</sup> CD27 <sup>+</sup> cells                      | 57 | 0.352 | 0.058   | 0.278  | 21        | 26            | 53           | 30.25       |
| 26 | CD8 <sup>+</sup> CD27 <sup>-</sup> CD28 <sup>-</sup> cells       | 57 | 0.622 | 0.119   | -0.388 | 31        | 32            | 33           | 31.75       |
| 27 | TEMRA CD8 <sup>+</sup> CD27 <sup>-</sup> CD28 <sup>-</sup> cells | 57 | 0.620 | 0.124   | -0.426 | 33        | 33            | 30           | 32.25       |
| 28 | let-7e                                                           | 65 | 0.628 | 0.077   | -0.302 | 30        | 29            | 45           | 33.50       |
| 29 | miR-21                                                           | 65 | 0.379 | 0.095   | 0.329  | 32        | 31            | 40           | 33.75       |
| 30 | Plasmacytoid dendritic cells                                     | 57 | 0.364 | 0.079   | 0.249  | 29        | 30            | 61           | 37.25       |
| 31 | EM CD8 <sup>+</sup> CD27 <sup>+</sup> CD28 <sup>+</sup> cells    | 57 | 0.360 | 0.071   | 0.197  | 26        | 28            | 74           | 38.50       |
| 32 | TEMRA CD8 <sup>+</sup> cells                                     | 57 | 0.604 | 0.181   | -0.322 | 37        | 39            | 42           | 38.75       |
| 33 | CD56 <sup>dim</sup> CD16 <sup>+</sup> NK-cells                   | 57 | 0.654 | 0.047   | -0.063 | 20        | 22            | 102          | 41.00       |
| 34 | TEMRA CD4 <sup>+</sup> cells                                     | 57 | 0.592 | 0.241   | -0.332 | 43        | 46            | 37           | 42.25       |
| 35 | TEMRA CD8 <sup>+</sup> CD27 <sup>+</sup> cells                   | 57 | 0.398 | 0.192   | 0.279  | 39        | 40            | 51           | 42.25       |
| 36 | miR-126                                                          | 65 | 0.406 | 0.193   | 0.285  | 41        | 42            | 48           | 43.00       |
| 37 | MCP-1                                                            | 65 | 0.611 | 0.128   | -0.181 | 34        | 34            | 77           | 44.75       |
| 38 | PD-L2                                                            | 65 | 0.397 | 0.155   | 0.194  | 38        | 35            | 75           | 46.50       |

|    |                                                                  |    |       |       |        |     |    |     |       |
|----|------------------------------------------------------------------|----|-------|-------|--------|-----|----|-----|-------|
| 39 | IL-8                                                             | 65 | 0.639 | 0.055 | -0.051 | 27  | 25 | 110 | 47.25 |
| 40 | Naive CD4 <sup>+</sup> CD57 <sup>+</sup> cells                   | 57 | 0.567 | 0.391 | -0.440 | 54  | 56 | 28  | 48.00 |
| 41 | EM CD8 <sup>+</sup> CD27 <sup>-</sup> CD28 <sup>-</sup> cells    | 57 | 0.582 | 0.294 | -0.295 | 48  | 50 | 47  | 48.25 |
| 42 | NK-cells                                                         | 57 | 0.588 | 0.261 | -0.278 | 46  | 49 | 52  | 48.25 |
| 43 | CD4 <sup>+</sup> CD27 <sup>+</sup> CD28 <sup>+</sup> cells       | 57 | 0.392 | 0.167 | 0.121  | 35  | 36 | 87  | 48.25 |
| 44 | PD-1                                                             | 65 | 0.432 | 0.351 | -0.320 | 52  | 54 | 43  | 50.25 |
| 45 | miR-181a                                                         | 65 | 0.432 | 0.351 | 0.326  | 53  | 55 | 41  | 50.50 |
| 46 | CRP                                                              | 65 | 0.584 | 0.247 | -0.250 | 47  | 48 | 60  | 50.50 |
| 47 | TEMRA CD8 <sup>+</sup> CD57 <sup>+</sup> cells                   | 57 | 0.582 | 0.296 | -0.273 | 49  | 51 | 55  | 51.00 |
| 48 | CD8 <sup>+</sup> CD28 <sup>+</sup> cells                         | 57 | 0.406 | 0.228 | 0.193  | 42  | 45 | 76  | 51.25 |
| 49 | PD-L1                                                            | 65 | 0.444 | 0.442 | 0.831  | 64  | 65 | 13  | 51.50 |
| 50 | sCD25                                                            | 65 | 0.588 | 0.226 | -0.198 | 45  | 44 | 72  | 51.50 |
| 51 | Hematopoietic stem cells                                         | 57 | 0.421 | 0.307 | 0.276  | 51  | 52 | 54  | 52.00 |
| 52 | TIM-3                                                            | 65 | 0.562 | 0.399 | -0.416 | 61  | 58 | 31  | 52.75 |
| 53 | IL-17F                                                           | 65 | 0.457 | 0.206 | 3.910  | 83  | 43 | 3   | 53.00 |
| 54 | B-cells                                                          | 57 | 0.435 | 0.412 | 0.318  | 56  | 60 | 44  | 54.00 |
| 55 | Non-switched memory B-cells                                      | 57 | 0.395 | 0.177 | 0.046  | 36  | 37 | 113 | 55.50 |
| 56 | TEMRA CD8 <sup>+</sup> CD27 <sup>+</sup> CD28 <sup>+</sup> cells | 57 | 0.434 | 0.400 | 0.272  | 55  | 59 | 56  | 56.25 |
| 57 | CD4 <sup>+</sup> CD27 <sup>+</sup> cells                         | 57 | 0.409 | 0.242 | 0.099  | 44  | 47 | 93  | 57.00 |
| 58 | Classical monocytes                                              | 57 | 0.398 | 0.193 | 0.052  | 40  | 41 | 108 | 57.25 |
| 59 | Free active TGF-β1                                               | 65 | 0.471 | 0.181 |        | 95  | 38 | 2   | 57.50 |
| 60 | TEMRA CD4 <sup>+</sup> CD27 <sup>-</sup> CD28 <sup>-</sup> cells | 57 | 0.551 | 0.516 | -0.630 | 70  | 73 | 19  | 58.00 |
| 61 | sCD27                                                            | 65 | 0.563 | 0.392 | -0.242 | 60  | 57 | 63  | 60.00 |
| 62 | Naive CD4 <sup>+</sup> CD27 <sup>-</sup> CD28 <sup>-</sup> cells | 57 | 0.545 | 0.564 | -0.868 | 76  | 79 | 10  | 60.25 |
| 63 | CD4 <sup>+</sup> CD57 <sup>+</sup> cells                         | 57 | 0.552 | 0.509 | -0.332 | 67  | 70 | 38  | 60.50 |
| 64 | EM CD4 <sup>+</sup> CD57 <sup>+</sup> cells                      | 57 | 0.579 | 0.309 | 0.103  | 50  | 53 | 91  | 61.00 |
| 65 | Non-classical monocytes                                          | 57 | 0.563 | 0.421 | -0.208 | 59  | 63 | 68  | 62.25 |
| 66 | miR-150                                                          | 65 | 0.444 | 0.446 | 0.272  | 65  | 66 | 57  | 63.25 |
| 67 | CD8 <sup>+</sup> CD57 <sup>+</sup> cells                         | 57 | 0.563 | 0.421 | -0.179 | 58  | 62 | 78  | 64.00 |
| 68 | Naive CD4 <sup>+</sup> CD27 <sup>+</sup> CD28 <sup>+</sup> cells | 57 | 0.437 | 0.421 | 0.141  | 57  | 61 | 83  | 64.50 |
| 69 | CM CD4 <sup>+</sup> CD57 <sup>+</sup> cells                      | 57 | 0.547 | 0.553 | -0.331 | 75  | 78 | 39  | 66.75 |
| 70 | CD4 <sup>+</sup> CD27 <sup>-</sup> CD28 <sup>-</sup> cells       | 57 | 0.543 | 0.586 | -0.388 | 81  | 83 | 34  | 69.75 |
| 71 | NK-like T-cells                                                  | 57 | 0.553 | 0.501 | -0.156 | 66  | 69 | 81  | 70.50 |
| 72 | CM CD8 <sup>+</sup> CD27 <sup>-</sup> CD28 <sup>-</sup> cells    | 57 | 0.535 | 0.654 | -0.542 | 88  | 90 | 23  | 72.25 |
| 73 | EM CD8 <sup>+</sup> CD57 <sup>+</sup> cells                      | 57 | 0.558 | 0.459 | -0.081 | 63  | 67 | 99  | 73.00 |
| 74 | EM CD8 <sup>+</sup> CD28 <sup>+</sup> cells                      | 57 | 0.439 | 0.440 | 0.059  | 62  | 64 | 104 | 73.00 |
| 75 | EM CD4 <sup>+</sup> CD27 <sup>+</sup> cells                      | 57 | 0.453 | 0.551 | 0.198  | 73  | 75 | 73  | 73.50 |
| 76 | EM CD4 <sup>+</sup> CD27 <sup>+</sup> CD28 <sup>+</sup> cells    | 57 | 0.453 | 0.551 | 0.199  | 74  | 76 | 71  | 73.75 |
| 77 | TEMRA CD4 <sup>+</sup> CD57 <sup>+</sup> cells                   | 57 | 0.531 | 0.695 | -0.706 | 94  | 95 | 16  | 74.75 |
| 78 | Naive CD8 <sup>+</sup> CD57 <sup>+</sup> cells                   | 57 | 0.456 | 0.575 | 0.254  | 79  | 82 | 59  | 74.75 |
| 79 | IL-6                                                             | 65 | 0.550 | 0.495 | -0.108 | 71  | 68 | 89  | 74.75 |
| 80 | Naive CD4 <sup>+</sup> CD27 <sup>+</sup> cells                   | 57 | 0.448 | 0.509 | 0.102  | 68  | 71 | 92  | 74.75 |
| 81 | CD86                                                             | 65 | 0.456 | 0.553 | 0.213  | 80  | 77 | 67  | 76.00 |
| 82 | CTLA-4                                                           | 65 | 0.480 | 0.668 | -0.458 | 103 | 93 | 26  | 81.25 |
| 83 | EM CD4 <sup>+</sup> CD27 <sup>-</sup> CD28 <sup>-</sup> cells    | 57 | 0.551 | 0.511 | -0.030 | 69  | 72 | 118 | 82.00 |

|     |                                                                  |    |       |       |        |     |     |     |        |
|-----|------------------------------------------------------------------|----|-------|-------|--------|-----|-----|-----|--------|
| 84  | Naive CD8 <sup>+</sup> CD27 <sup>-</sup> CD28 <sup>-</sup> cells | 57 | 0.450 | 0.527 | -0.045 | 72  | 74  | 115 | 83.25  |
| 85  | IL12p70                                                          | 65 | 0.535 | 0.631 | -0.216 | 90  | 88  | 66  | 83.50  |
| 86  | TNF- $\alpha$                                                    | 65 | 0.539 | 0.594 | -0.177 | 85  | 85  | 79  | 83.50  |
| 87  | Naive CD4 <sup>+</sup> cells                                     | 57 | 0.455 | 0.572 | 0.078  | 77  | 80  | 101 | 83.75  |
| 88  | CM CD8 <sup>+</sup> CD27 <sup>+</sup> cells                      | 57 | 0.468 | 0.689 | 0.257  | 92  | 94  | 58  | 84.00  |
| 89  | miR-424                                                          | 65 | 0.537 | 0.613 | -0.148 | 86  | 86  | 82  | 85.00  |
| 90  | Tregs                                                            | 57 | 0.527 | 0.730 | -0.298 | 99  | 101 | 46  | 86.25  |
| 91  | Naive CD4 <sup>+</sup> CD28 <sup>+</sup> cells                   | 57 | 0.457 | 0.586 | 0.081  | 82  | 84  | 97  | 86.25  |
| 92  | Myeloid dendritic cells                                          | 57 | 0.461 | 0.619 | 0.080  | 84  | 87  | 100 | 88.75  |
| 93  | CM CD8 <sup>+</sup> CD27 <sup>+</sup> CD28 <sup>+</sup> cells    | 57 | 0.471 | 0.721 | 0.242  | 98  | 100 | 62  | 89.50  |
| 94  | CD8 <sup>+</sup> cells                                           | 57 | 0.455 | 0.572 | 0.019  | 78  | 81  | 121 | 89.50  |
| 95  | CM CD4 <sup>+</sup> CD27 <sup>+</sup> CD28 <sup>+</sup> cells    | 57 | 0.463 | 0.642 | 0.050  | 87  | 89  | 111 | 93.50  |
| 96  | CM CD4 <sup>+</sup> CD27 <sup>-</sup> CD28 <sup>-</sup> cells    | 57 | 0.504 | 0.960 | -0.967 | 123 | 124 | 9   | 94.75  |
| 97  | Memory Tregs                                                     | 57 | 0.465 | 0.662 | 0.055  | 91  | 92  | 105 | 94.75  |
| 98  | CM CD8 <sup>+</sup> CD57 <sup>+</sup> cells                      | 57 | 0.482 | 0.822 | 0.236  | 105 | 106 | 64  | 95.00  |
| 99  | EM CD4 <sup>+</sup> CD28 <sup>+</sup> cells                      | 57 | 0.471 | 0.721 | 0.118  | 97  | 99  | 88  | 95.25  |
| 100 | CM CD4 <sup>+</sup> CD27 <sup>+</sup> cells                      | 57 | 0.465 | 0.654 | 0.048  | 89  | 91  | 112 | 95.25  |
| 101 | miR-17                                                           | 65 | 0.473 | 0.713 | 0.134  | 100 | 97  | 85  | 95.50  |
| 102 | CD4 <sup>+</sup> CD28 <sup>+</sup> cells                         | 57 | 0.469 | 0.695 | 0.051  | 93  | 96  | 109 | 97.75  |
| 103 | TEMRA CD4 <sup>+</sup> CD28 <sup>+</sup> cells                   | 57 | 0.516 | 0.841 | -0.203 | 108 | 108 | 70  | 98.50  |
| 104 | CD4 <sup>+</sup> Tregs                                           | 57 | 0.529 | 0.718 | -0.054 | 96  | 98  | 106 | 99.00  |
| 105 | miR-223                                                          | 65 | 0.517 | 0.818 | -0.081 | 106 | 105 | 98  | 103.75 |
| 106 | IL-1 $\beta$                                                     | 65 | 0.517 | 0.823 | -0.087 | 107 | 107 | 96  | 104.25 |
| 107 | TEMRA CD4 <sup>+</sup> CD27 <sup>+</sup> CD28 <sup>+</sup> cells | 57 | 0.475 | 0.755 | 0.021  | 101 | 102 | 120 | 106.00 |
| 108 | miR-146a                                                         | 65 | 0.511 | 0.880 | 0.127  | 114 | 114 | 86  | 107.00 |
| 109 | miR-92a                                                          | 65 | 0.522 | 0.763 | 0.010  | 102 | 103 | 125 | 108.00 |
| 110 | CM CD4 <sup>+</sup> cells                                        | 57 | 0.485 | 0.855 | -0.052 | 109 | 110 | 107 | 108.75 |
| 111 | EM CD8 <sup>+</sup> cells                                        | 57 | 0.520 | 0.805 | 0.009  | 104 | 104 | 126 | 109.50 |
| 112 | IL-10                                                            | 65 | 0.504 | 0.958 | -0.205 | 124 | 123 | 69  | 110.00 |
| 113 | LAG-3                                                            | 65 | 0.493 | 0.932 | 0.164  | 120 | 120 | 80  | 110.00 |
| 114 | CD4/CD8 Ratio                                                    | 57 | 0.504 | 0.968 | -0.236 | 126 | 125 | 65  | 110.50 |
| 115 | CM CD4 <sup>+</sup> CD28 <sup>+</sup> cells                      | 57 | 0.485 | 0.855 | -0.046 | 110 | 111 | 114 | 111.25 |
| 116 | IFN- $\gamma$                                                    | 65 | 0.514 | 0.854 | -0.041 | 112 | 109 | 116 | 112.25 |
| 117 | CM CD8 <sup>+</sup> cells                                        | 57 | 0.509 | 0.911 | 0.099  | 119 | 119 | 94  | 112.75 |
| 118 | CM CD8 <sup>+</sup> CD28 <sup>+</sup> cells                      | 57 | 0.505 | 0.955 | 0.106  | 122 | 121 | 90  | 113.75 |
| 119 | EM CD4 <sup>+</sup> cells                                        | 57 | 0.505 | 0.955 | 0.094  | 121 | 122 | 95  | 114.75 |
| 120 | IL-27                                                            | 65 | 0.511 | 0.880 | -0.016 | 113 | 113 | 122 | 115.25 |
| 121 | CD4 <sup>+</sup> cells                                           | 57 | 0.485 | 0.855 | 0.000  | 111 | 112 | 129 | 115.75 |
| 122 | let-7i                                                           | 65 | 0.511 | 0.885 | -0.040 | 116 | 115 | 117 | 116.00 |
| 123 | Monocytes                                                        | 57 | 0.500 | 1.000 | -0.136 | 128 | 128 | 84  | 117.00 |
| 124 | Naive B-cells                                                    | 57 | 0.490 | 0.905 | 0.026  | 118 | 118 | 119 | 118.25 |
| 125 | TEMRA CD4 <sup>+</sup> CD27 <sup>+</sup> cells                   | 57 | 0.489 | 0.898 | -0.015 | 117 | 117 | 123 | 118.50 |
| 126 | CD3 <sup>+</sup> cells                                           | 57 | 0.511 | 0.892 | 0.001  | 115 | 116 | 128 | 118.50 |
| 127 | TEMRA CD8 <sup>+</sup> CD28 <sup>+</sup> cells                   | 57 | 0.496 | 0.968 | -0.062 | 125 | 126 | 103 | 119.75 |
| 128 | Class-switched memory B-cells                                    | 57 | 0.501 | 1.000 | 0.014  | 127 | 127 | 124 | 126.25 |

|     |  |             |  |  |    |  |       |  |       |  |       |  |     |  |     |  |     |  |        |
|-----|--|-------------|--|--|----|--|-------|--|-------|--|-------|--|-----|--|-----|--|-----|--|--------|
| 129 |  | Naive Tregs |  |  | 57 |  | 0.500 |  | 1.000 |  | 0.006 |  | 129 |  | 129 |  | 127 |  | 128.50 |
|-----|--|-------------|--|--|----|--|-------|--|-------|--|-------|--|-----|--|-----|--|-----|--|--------|
