# Supplementary material for: Blood Immunosenescence Signatures Reflecting Age, Frailty and Tumor Immune Infiltrate in Patients with Early Luminal Breast Cancer
Source: MDPI journal article supplement (doi:10.3390/cancers13092185), 2021-05-02
Supplement: s1 [file s1]

Table S3: Individual performances of biomarkers correlating with sTIL infiltration (high, intermediate or low infiltration). The table reports the number of patients (N) for which the biomarkers could be measured, as well as the area under the curve (AUC) via receiver operating characteristics (ROC), P-value (Wilcox rank-sum test) and log fold change (FC) for each biomarker. The log FC compared case vs. control. A positive log FC indicates that the measurement is higher than its reference while a negative measurement indicates that is smaller. Based on these statistics AUC, P-value, log FC scores were computed. The final score combines the 3 scores, where AUC weighted double. The biomarkers are ranked based on their final score.

|                               | Blood markers                                                    | N  | AUC   | P-value | log FC | AUC score | P-value score | log FC score | Final score |
|-------------------------------|------------------------------------------------------------------|----|-------|---------|--------|-----------|---------------|--------------|-------------|
| <b>HIGH sTIL INFILTRATION</b> |                                                                  |    |       |         |        |           |               |              |             |
| 1                             | TIM-3                                                            | 62 | 0.747 | 0.070   | -0.908 | 2         | 24            | 20           | 12.00       |
| 2                             | TEMRA CD8 <sup>+</sup> CD27 <sup>+</sup> CD28 <sup>-</sup> cells | 54 | 0.265 | 0.089   | 0.630  | 5         | 34            | 37           | 20.25       |
| 3                             | let-7i                                                           | 62 | 0.739 | 0.081   | -0.556 | 3         | 30            | 51           | 21.75       |
| 4                             | EM CD8 <sup>+</sup> cells                                        | 54 | 0.735 | 0.089   | -0.549 | 4         | 35            | 55           | 24.50       |
| 5                             | Tumor grade                                                      | 62 | 0.158 | 0.003   | 0.384  | 1         | 1             | 104          | 26.75       |
| 6                             | Tregs                                                            | 54 | 0.696 | 0.156   | -0.781 | 13        | 69            | 26           | 30.25       |
| 7                             | TEMRA CD8 <sup>+</sup> cells                                     | 54 | 0.269 | 0.095   | 0.480  | 6         | 38            | 72           | 30.50       |
| 8                             | TEMRA CD8 <sup>+</sup> CD27 <sup>+</sup> cells                   | 54 | 0.271 | 0.098   | 0.495  | 7         | 39            | 70           | 30.75       |
| 9                             | miR-424                                                          | 62 | 0.707 | 0.130   | -0.587 | 10        | 59            | 47           | 31.50       |
| 10                            | TEMRA CD8 <sup>+</sup> CD57 <sup>+</sup> cells                   | 54 | 0.282 | 0.116   | 0.514  | 8         | 47            | 67           | 32.50       |
| 11                            | let-7e                                                           | 62 | 0.691 | 0.163   | -0.606 | 14        | 72            | 43           | 35.75       |
| 12                            | EM CD4 <sup>+</sup> CD27 <sup>+</sup> CD28 <sup>-</sup> cells    | 54 | 0.324 | 0.205   | 1.466  | 25        | 89            | 10           | 37.25       |
| 13                            | sCD25                                                            | 62 | 0.684 | 0.179   | -0.591 | 18        | 80            | 46           | 40.50       |
| 14                            | miR-181a                                                         | 62 | 0.679 | 0.192   | -0.640 | 23        | 83            | 35           | 41.00       |
| 15                            | CTLA-4                                                           | 62 | 0.363 | 0.120   | 1.529  | 68        | 48            | 9            | 48.25       |
| 16                            | miR-20a                                                          | 62 | 0.295 | 0.134   | 0.355  | 12        | 62            | 115          | 50.25       |
| 17                            | TEMRA CD8 <sup>+</sup> CD27 <sup>+</sup> CD28 <sup>+</sup> cells | 54 | 0.318 | 0.189   | 0.402  | 20        | 82            | 97           | 54.75       |
| 18                            | CD8 <sup>+</sup> CD27 <sup>+</sup> CD28 <sup>-</sup> cells       | 54 | 0.327 | 0.217   | 0.423  | 26        | 92            | 84           | 57.00       |
| 19                            | EM CD8 <sup>+</sup> CD28 <sup>+</sup> cells                      | 54 | 0.665 | 0.241   | -0.528 | 32        | 103           | 63           | 57.50       |
| 20                            | Hematopoietic stem cells                                         | 54 | 0.653 | 0.267   | -0.750 | 45        | 117           | 28           | 58.75       |
| 21                            | Naive CD8 <sup>+</sup> CD27 <sup>+</sup> CD28 <sup>-</sup> cells | 54 | 0.343 | 0.257   | 0.531  | 38        | 109           | 62           | 61.75       |
| 22                            | CD8 <sup>+</sup> CD28 <sup>+</sup> cells                         | 54 | 0.669 | 0.229   | -0.332 | 28        | 97            | 121          | 68.50       |
| 23                            | CD4 <sup>+</sup> CD57 <sup>+</sup> cells                         | 54 | 0.359 | 0.321   | 0.789  | 63        | 132           | 24           | 70.50       |
| 24                            | CD86                                                             | 62 | 0.656 | 0.255   | -0.413 | 42        | 108           | 92           | 71.00       |
| 25                            | CD4 <sup>+</sup> Tregs                                           | 54 | 0.649 | 0.283   | -0.510 | 50        | 120           | 68           | 72.00       |
| 26                            | CD4 <sup>+</sup> CD27 <sup>+</sup> CD28 <sup>-</sup> cells       | 54 | 0.363 | 0.325   | 0.988  | 69        | 134           | 17           | 72.25       |
| 27                            | TEMRA CD4 <sup>+</sup> CD27 <sup>+</sup> CD28 <sup>-</sup> cells | 54 | 0.355 | 0.296   | 0.570  | 58        | 124           | 49           | 72.25       |
| 28                            | CM CD8 <sup>+</sup> CD57 <sup>+</sup> cells                      | 54 | 0.333 | 0.227   | 0.308  | 30        | 96            | 133          | 72.25       |
| 29                            | NK-like T-cells                                                  | 54 | 0.371 | 0.355   | 0.607  | 81        | 148           | 42           | 88.00       |
| 30                            | EM CD4 <sup>+</sup> CD28 <sup>+</sup> cells                      | 54 | 0.645 | 0.306   | -0.352 | 57        | 128           | 116          | 89.50       |
| 31                            | CD8 <sup>+</sup> CD57 <sup>+</sup> cells                         | 54 | 0.347 | 0.279   | 0.270  | 46        | 119           | 149          | 90.00       |
| 32                            | TEMRA CD4 <sup>+</sup> CD57 <sup>+</sup> cells                   | 54 | 0.376 | 0.371   | 0.552  | 84        | 155           | 54           | 94.25       |
| 33                            | Memory Tregs                                                     | 54 | 0.351 | 0.292   | 0.267  | 51        | 123           | 155          | 95.00       |
| 34                            | Gal-9                                                            | 62 | 0.621 | 0.379   | -0.620 | 92        | 159           | 40           | 95.75       |
| 35                            | EM CD4 <sup>+</sup> CD57 <sup>+</sup> cells                      | 54 | 0.384 | 0.403   | 1.136  | 105       | 170           | 11           | 97.75       |
| 36                            | Naive CD4 <sup>+</sup> CD27 <sup>+</sup> CD28 <sup>-</sup> cells | 54 | 0.365 | 0.332   | 0.290  | 71        | 137           | 139          | 104.50      |
| 37                            | Naive Tregs                                                      | 54 | 0.657 | 0.266   | -0.147 | 39        | 114           | 252          | 111.00      |

|    |                                                                  |    |       |       |        |     |     |     |        |
|----|------------------------------------------------------------------|----|-------|-------|--------|-----|-----|-----|--------|
| 38 | IL12p70                                                          | 62 | 0.611 | 0.423 | -0.621 | 115 | 179 | 39  | 112.00 |
| 39 | miR-195                                                          | 62 | 0.393 | 0.438 | 1.116  | 125 | 189 | 13  | 113.00 |
| 40 | CD4 <sup>+</sup> CD28 <sup>+</sup> cells                         | 54 | 0.645 | 0.296 | -0.195 | 59  | 125 | 209 | 113.00 |
| 41 | IL-6                                                             | 62 | 0.614 | 0.408 | -0.541 | 111 | 176 | 60  | 114.50 |
| 42 | EM CD8 <sup>+</sup> CD27 <sup>+</sup> cells                      | 54 | 0.616 | 0.403 | -0.452 | 106 | 171 | 75  | 114.50 |
| 43 | EM CD8 <sup>+</sup> CD27 <sup>+</sup> CD28 <sup>+</sup> cells    | 54 | 0.616 | 0.403 | -0.403 | 107 | 173 | 95  | 120.50 |
| 44 | IL-1α                                                            | 62 | 0.619 | 0.386 | -0.283 | 97  | 162 | 145 | 125.25 |
| 45 | Non-switched memory B-cells                                      | 54 | 0.380 | 0.398 | 0.282  | 95  | 167 | 146 | 125.75 |
| 46 | CM CD4 <sup>+</sup> CD27 <sup>+</sup> CD28 <sup>+</sup> cells    | 54 | 0.392 | 0.418 | 0.419  | 122 | 178 | 90  | 128.00 |
| 47 | CD8 <sup>+</sup> CD27 <sup>+</sup> CD28 <sup>+</sup> cells       | 54 | 0.620 | 0.387 | -0.235 | 94  | 163 | 179 | 132.50 |
| 48 | CM CD8 <sup>+</sup> CD27 <sup>+</sup> cells                      | 54 | 0.335 | 0.233 | 0.023  | 31  | 98  | 374 | 133.50 |
| 49 | CM CD8 <sup>+</sup> CD27 <sup>+</sup> CD28 <sup>+</sup> cells    | 54 | 0.339 | 0.253 | 0.028  | 35  | 106 | 365 | 135.25 |
| 50 | 4-1BB                                                            | 62 | 0.353 | 0.196 | -0.038 | 53  | 84  | 354 | 136.00 |
| 51 | Naive CD4 <sup>+</sup> CD57 <sup>+</sup> cells                   | 54 | 0.400 | 0.474 | 0.421  | 131 | 202 | 87  | 137.75 |
| 52 | TEMRA CD4 <sup>+</sup> cells                                     | 54 | 0.396 | 0.467 | 0.268  | 127 | 199 | 153 | 151.50 |
| 53 | IL-17F                                                           | 62 | 0.439 | 0.352 | -3.561 | 232 | 147 | 2   | 153.25 |
| 54 | Age                                                              | 62 | 0.618 | 0.393 | -0.154 | 100 | 165 | 248 | 153.25 |
| 55 | miR-125b                                                         | 62 | 0.389 | 0.423 | 0.195  | 117 | 180 | 208 | 155.50 |
| 56 | MCP-1                                                            | 62 | 0.611 | 0.423 | -0.170 | 116 | 181 | 231 | 161.00 |
| 57 | EM CD8 <sup>+</sup> CD57 <sup>+</sup> cells                      | 54 | 0.584 | 0.562 | -0.438 | 168 | 236 | 78  | 162.50 |
| 58 | Monocytes                                                        | 54 | 0.388 | 0.432 | 0.159  | 113 | 187 | 242 | 163.75 |
| 59 | Naive CD4 <sup>+</sup> CD27 <sup>+</sup> cells                   | 54 | 0.596 | 0.504 | -0.228 | 139 | 212 | 183 | 168.25 |
| 60 | Classical monocytes                                              | 54 | 0.367 | 0.350 | 0.018  | 76  | 146 | 377 | 168.75 |
| 61 | CD8 <sup>+</sup> CD27 <sup>+</sup> cells                         | 54 | 0.600 | 0.474 | -0.191 | 132 | 203 | 215 | 170.50 |
| 62 | EM CD8 <sup>+</sup> CD27 <sup>+</sup> CD28 <sup>+</sup> cells    | 54 | 0.576 | 0.591 | -0.542 | 187 | 250 | 59  | 170.75 |
| 63 | miR-155                                                          | 62 | 0.430 | 0.614 | 0.966  | 202 | 266 | 19  | 172.25 |
| 64 | miR-19a                                                          | 62 | 0.591 | 0.510 | -0.249 | 156 | 214 | 170 | 174.00 |
| 65 | CM CD8 <sup>+</sup> CD28 <sup>+</sup> cells                      | 54 | 0.376 | 0.371 | -0.019 | 85  | 156 | 375 | 175.25 |
| 66 | NK-cells                                                         | 54 | 0.616 | 0.415 | -0.040 | 103 | 177 | 349 | 183.00 |
| 67 | Naive CD8 <sup>+</sup> CD57 <sup>+</sup> cells                   | 54 | 0.404 | 0.492 | 0.155  | 141 | 209 | 246 | 184.25 |
| 68 | Plasmacytoid dendritic cells                                     | 54 | 0.414 | 0.541 | 0.223  | 163 | 224 | 188 | 184.50 |
| 69 | Naive CD4 <sup>+</sup> CD28 <sup>+</sup> cells                   | 54 | 0.584 | 0.551 | -0.229 | 167 | 230 | 182 | 186.50 |
| 70 | Non-classical monocytes                                          | 54 | 0.596 | 0.504 | -0.142 | 140 | 213 | 256 | 187.25 |
| 71 | CM CD8 <sup>+</sup> cells                                        | 54 | 0.384 | 0.403 | -0.019 | 104 | 172 | 376 | 189.00 |
| 72 | Naive CD8 <sup>+</sup> CD28 <sup>+</sup> cells                   | 54 | 0.567 | 0.633 | -0.517 | 215 | 273 | 65  | 192.00 |
| 73 | miR-92a                                                          | 62 | 0.423 | 0.578 | 0.260  | 182 | 244 | 160 | 192.00 |
| 74 | miR-223                                                          | 62 | 0.430 | 0.614 | 0.394  | 203 | 265 | 100 | 192.75 |
| 75 | Naive CD4 <sup>+</sup> cells                                     | 54 | 0.580 | 0.581 | -0.236 | 177 | 245 | 178 | 194.25 |
| 76 | Naive CD4 <sup>+</sup> CD27 <sup>+</sup> CD28 <sup>+</sup> cells | 54 | 0.580 | 0.581 | -0.224 | 178 | 246 | 187 | 197.25 |
| 77 | CRP                                                              | 62 | 0.568 | 0.623 | -0.376 | 209 | 271 | 108 | 199.25 |
| 78 | Lymphnode involvement                                            | 62 | 0.563 | 0.601 | -0.396 | 225 | 258 | 98  | 201.50 |
| 79 | miR-126                                                          | 62 | 0.426 | 0.596 | 0.259  | 194 | 255 | 163 | 201.50 |
| 80 | CM CD4 <sup>+</sup> CD27 <sup>+</sup> CD28 <sup>+</sup> cells    | 54 | 0.408 | 0.511 | 0.094  | 152 | 215 | 293 | 203.00 |
| 81 | CM CD4 <sup>+</sup> CD27 <sup>+</sup> cells                      | 54 | 0.408 | 0.523 | 0.091  | 151 | 219 | 295 | 204.00 |
| 82 | CD4 <sup>+</sup> CD27 <sup>+</sup> cells                         | 54 | 0.584 | 0.551 | -0.124 | 164 | 229 | 267 | 206.00 |

|     |                                                                  |    |       |       |        |     |     |     |        |
|-----|------------------------------------------------------------------|----|-------|-------|--------|-----|-----|-----|--------|
| 83  | CD4 <sup>+</sup> CD27 <sup>+</sup> CD28 <sup>+</sup> cells       | 54 | 0.584 | 0.562 | -0.127 | 165 | 234 | 265 | 207.25 |
| 84  | EM CD4 <sup>+</sup> CD27 <sup>+</sup> cells                      | 54 | 0.576 | 0.602 | -0.213 | 186 | 260 | 198 | 207.50 |
| 85  | B-cells                                                          | 54 | 0.592 | 0.523 | -0.080 | 153 | 220 | 309 | 208.75 |
| 86  | miR-9                                                            | 62 | 0.547 | 0.694 | 1.057  | 265 | 292 | 14  | 209.00 |
| 87  | IGF-1                                                            | 62 | 0.582 | 0.552 | -0.120 | 171 | 232 | 270 | 211.00 |
| 88  | TNF- $\alpha$                                                    | 62 | 0.556 | 0.688 | -0.449 | 245 | 288 | 77  | 213.75 |
| 89  | miR-21                                                           | 62 | 0.407 | 0.501 | 0.039  | 149 | 211 | 350 | 214.75 |
| 90  | T-cell <i>P16<sup>INK4a</sup></i>                                | 42 | 0.440 | 0.751 | -0.476 | 235 | 318 | 73  | 215.25 |
| 91  | Intermediate monocytes                                           | 54 | 0.592 | 0.523 | -0.041 | 154 | 221 | 348 | 219.25 |
| 92  | miR-326                                                          | 62 | 0.561 | 0.607 | -0.270 | 233 | 263 | 150 | 219.75 |
| 93  | IL-1 $\beta$                                                     | 62 | 0.556 | 0.688 | -0.384 | 244 | 289 | 105 | 220.50 |
| 94  | EM CD4 <sup>+</sup> CD27 <sup>+</sup> CD28 <sup>+</sup> cells    | 54 | 0.567 | 0.643 | -0.222 | 214 | 276 | 190 | 223.50 |
| 95  | Class-switched memory B-cells                                    | 54 | 0.569 | 0.622 | -0.188 | 205 | 270 | 218 | 224.50 |
| 96  | Tumor size                                                       | 62 | 0.418 | 0.548 | -0.059 | 172 | 228 | 326 | 224.50 |
| 97  | Naive CD8 <sup>+</sup> CD27 <sup>+</sup> CD28 <sup>+</sup> cells | 54 | 0.547 | 0.750 | -0.543 | 268 | 317 | 58  | 227.75 |
| 98  | IP-10                                                            | 62 | 0.565 | 0.642 | -0.188 | 218 | 275 | 217 | 232.00 |
| 99  | Naive CD8 <sup>+</sup> cells                                     | 54 | 0.547 | 0.750 | -0.422 | 267 | 316 | 86  | 234.00 |
| 100 | CD56 <sup>bright</sup> CD16 <sup>-</sup> NK-cells                | 54 | 0.557 | 0.687 | -0.237 | 242 | 287 | 177 | 237.00 |
| 101 | CM CD4 <sup>+</sup> cells                                        | 54 | 0.416 | 0.562 | 0.012  | 166 | 235 | 389 | 239.00 |
| 102 | Naive CD8 <sup>+</sup> CD27 <sup>+</sup> cells                   | 54 | 0.543 | 0.765 | -0.525 | 285 | 324 | 64  | 239.50 |
| 103 | IFN- $\gamma$                                                    | 62 | 0.549 | 0.727 | -0.285 | 263 | 306 | 144 | 244.00 |
| 104 | Free active TGF- $\beta$ 1                                       | 62 | 0.518 | 0.704 |        | 351 | 295 | 1   | 249.50 |
| 105 | sCD27                                                            | 62 | 0.432 | 0.623 | -0.073 | 210 | 272 | 313 | 251.25 |
| 106 | CM CD4 <sup>+</sup> CD28 <sup>+</sup> cells                      | 54 | 0.424 | 0.602 | 0.011  | 185 | 259 | 390 | 254.75 |
| 107 | LAG-3                                                            | 62 | 0.530 | 0.836 | -0.573 | 316 | 349 | 48  | 257.25 |
| 108 | CD4 <sup>+</sup> cells                                           | 54 | 0.551 | 0.728 | -0.187 | 254 | 307 | 219 | 258.50 |
| 109 | CM CD4 <sup>+</sup> CD57 <sup>+</sup> cells                      | 54 | 0.449 | 0.720 | -0.165 | 255 | 300 | 237 | 261.75 |
| 110 | IL-17A                                                           | 62 | 0.481 | 0.897 | -1.036 | 345 | 369 | 15  | 268.50 |
| 111 | TEMRA CD4 <sup>+</sup> CD28 <sup>+</sup> cells                   | 54 | 0.555 | 0.707 | -0.092 | 248 | 296 | 294 | 271.50 |
| 112 | miR-18a                                                          | 62 | 0.546 | 0.747 | -0.169 | 278 | 315 | 232 | 275.75 |
| 113 | PD-1                                                             | 62 | 0.486 | 0.928 | -0.968 | 363 | 378 | 18  | 280.50 |
| 114 | miR-150                                                          | 62 | 0.530 | 0.836 | -0.268 | 318 | 348 | 152 | 284.00 |
| 115 | miR-146a                                                         | 62 | 0.556 | 0.689 | -0.024 | 246 | 290 | 373 | 288.75 |
| 116 | CD8 <sup>+</sup> cells                                           | 54 | 0.465 | 0.817 | 0.176  | 300 | 342 | 228 | 292.50 |
| 117 | TEMRA CD4 <sup>+</sup> CD27 <sup>+</sup> CD28 <sup>+</sup> cells | 54 | 0.547 | 0.743 | -0.059 | 266 | 312 | 329 | 293.25 |
| 118 | miR-17                                                           | 62 | 0.460 | 0.776 | 0.059  | 288 | 332 | 325 | 308.25 |
| 119 | CD56 <sup>dim</sup> CD16 <sup>+</sup> NK-cells                   | 54 | 0.457 | 0.772 | 0.042  | 284 | 327 | 344 | 309.75 |
| 120 | TEMRA CD8 <sup>+</sup> CD28 <sup>+</sup> cells                   | 54 | 0.453 | 0.743 | -0.008 | 269 | 313 | 395 | 311.50 |
| 121 | PD-L1                                                            | 62 | 0.544 | 0.756 | 0.026  | 281 | 320 | 369 | 312.75 |
| 122 | IL-10                                                            | 62 | 0.496 | 0.990 | -0.410 | 392 | 395 | 93  | 318.00 |
| 123 | miR-19b                                                          | 62 | 0.460 | 0.776 | -0.014 | 289 | 331 | 382 | 322.75 |
| 124 | IL-27                                                            | 62 | 0.516 | 0.918 | -0.186 | 355 | 373 | 221 | 326.00 |
| 125 | PD-L2                                                            | 62 | 0.470 | 0.836 | 0.066  | 317 | 350 | 321 | 326.25 |
| 126 | CM CD8 <sup>+</sup> CD27 <sup>-</sup> CD28 <sup>-</sup> cells    | 54 | 0.467 | 0.823 | 0.038  | 305 | 345 | 352 | 326.75 |
| 127 | IL-8                                                             | 62 | 0.484 | 0.918 | -0.157 | 356 | 374 | 243 | 332.25 |

|                                |                                                                  |    |       |       |        |     |     |     |        |
|--------------------------------|------------------------------------------------------------------|----|-------|-------|--------|-----|-----|-----|--------|
| 128                            | CD4/CD8 Ratio                                                    | 54 | 0.520 | 0.893 | -0.062 | 342 | 367 | 323 | 343.50 |
| 129                            | TEMRA CD4 <sup>+</sup> CD27 <sup>+</sup> cells                   | 54 | 0.527 | 0.858 | 0.010  | 327 | 356 | 392 | 350.50 |
| 130                            | Naive B-cells                                                    | 54 | 0.522 | 0.885 | -0.032 | 340 | 365 | 360 | 351.25 |
| 131                            | CD3 <sup>+</sup> cells                                           | 54 | 0.486 | 0.929 | -0.027 | 360 | 379 | 366 | 366.25 |
| 132                            | EM CD4 <sup>+</sup> cells                                        | 54 | 0.498 | 1.000 | 0.104  | 395 | 397 | 284 | 367.75 |
| 133                            | Myeloid dendritic cells                                          | 54 | 0.508 | 0.964 | 0.016  | 379 | 387 | 381 | 381.50 |
| INTERMEDIATE sTIL INFILTRATION |                                                                  |    |       |       |        |     |     |     |        |
| 1                              | PD-L1                                                            | 62 | 0.313 | 0.018 | 0.704  | 15  | 5   | 31  | 16.50  |
| 2                              | TEMRA CD4 <sup>+</sup> CD57 <sup>+</sup> cells                   | 54 | 0.317 | 0.033 | 0.705  | 19  | 10  | 30  | 19.50  |
| 3                              | TEMRA CD4 <sup>+</sup> CD27 <sup>+</sup> CD28 <sup>+</sup> cells | 54 | 0.356 | 0.094 | 0.601  | 60  | 37  | 45  | 50.50  |
| 4                              | Intermediate monocytes                                           | 54 | 0.658 | 0.065 | -0.360 | 36  | 21  | 111 | 51.00  |
| 5                              | CD8 <sup>+</sup> cells                                           | 54 | 0.337 | 0.057 | 0.315  | 34  | 16  | 129 | 53.25  |
| 6                              | Tumor size                                                       | 62 | 0.656 | 0.047 | -0.351 | 43  | 13  | 117 | 54.00  |
| 7                              | CD4/CD8 ratio                                                    | 54 | 0.631 | 0.127 | -0.623 | 78  | 56  | 38  | 62.50  |
| 8                              | MCP-1                                                            | 62 | 0.668 | 0.034 | -0.228 | 29  | 11  | 185 | 63.50  |
| 9                              | CM CD8 <sup>+</sup> CD27 <sup>+</sup> CD28 <sup>+</sup> cells    | 54 | 0.647 | 0.087 | -0.296 | 54  | 32  | 136 | 69.00  |
| 10                             | Tregs                                                            | 54 | 0.633 | 0.122 | -0.380 | 75  | 50  | 107 | 76.75  |
| 11                             | EM CD8 <sup>+</sup> CD28 <sup>+</sup> cells                      | 54 | 0.633 | 0.123 | -0.374 | 74  | 53  | 109 | 77.50  |
| 12                             | CM CD8 <sup>+</sup> CD28 <sup>+</sup> cells                      | 54 | 0.631 | 0.127 | -0.374 | 77  | 55  | 110 | 79.75  |
| 13                             | G8 score                                                         | 27 | 0.717 | 0.076 | -0.104 | 9   | 29  | 285 | 83.00  |
| 14                             | CM CD8 <sup>+</sup> CD27 <sup>+</sup> cells                      | 54 | 0.641 | 0.101 | -0.256 | 65  | 41  | 166 | 84.25  |
| 15                             | Memory Tregs                                                     | 54 | 0.639 | 0.106 | -0.252 | 67  | 43  | 168 | 86.25  |
| 16                             | miR-150                                                          | 62 | 0.386 | 0.150 | 0.532  | 110 | 67  | 61  | 87.00  |
| 17                             | IGF-1                                                            | 62 | 0.357 | 0.072 | 0.208  | 61  | 27  | 201 | 87.50  |
| 18                             | NK-like T-cells                                                  | 54 | 0.381 | 0.165 | 0.429  | 98  | 74  | 81  | 87.75  |
| 19                             | CM CD8 <sup>+</sup> cells                                        | 54 | 0.627 | 0.139 | -0.307 | 83  | 65  | 134 | 91.25  |
| 20                             | miR-195                                                          | 62 | 0.380 | 0.130 | 0.325  | 96  | 58  | 127 | 94.25  |
| 21                             | miR-9                                                            | 62 | 0.408 | 0.178 | 0.729  | 155 | 78  | 29  | 104.25 |
| 22                             | T-cell <i>P16<sup>INK4a</sup></i>                                | 42 | 0.369 | 0.162 | 0.196  | 79  | 71  | 206 | 108.75 |
| 23                             | Monocytes                                                        | 54 | 0.372 | 0.137 | 0.183  | 82  | 64  | 224 | 113.00 |
| 24                             | CD4 <sup>+</sup> CD57 <sup>+</sup> cells                         | 54 | 0.390 | 0.201 | 0.301  | 119 | 87  | 135 | 115.00 |
| 25                             | miR-146a                                                         | 62 | 0.398 | 0.201 | 0.288  | 129 | 85  | 142 | 121.25 |
| 26                             | CD56 <sup>bright</sup> CD16 <sup>+</sup> NK-cells                | 54 | 0.390 | 0.202 | 0.265  | 120 | 88  | 157 | 121.25 |
| 27                             | Gal-9                                                            | 62 | 0.594 | 0.239 | -0.386 | 147 | 102 | 102 | 124.50 |
| 28                             | Naive CD4 <sup>+</sup> CD27 <sup>+</sup> CD28 <sup>+</sup> cells | 54 | 0.417 | 0.337 | 0.808  | 170 | 138 | 23  | 125.25 |
| 29                             | IL-6                                                             | 62 | 0.590 | 0.259 | -0.452 | 158 | 110 | 76  | 125.50 |
| 30                             | CD4 <sup>+</sup> cells                                           | 54 | 0.610 | 0.201 | -0.232 | 118 | 86  | 181 | 125.75 |
| 31                             | IL-17A                                                           | 62 | 0.425 | 0.346 | 1.953  | 191 | 145 | 7   | 133.50 |
| 32                             | PD-1                                                             | 62 | 0.402 | 0.219 | 0.245  | 135 | 93  | 173 | 134.00 |
| 33                             | EM CD4 <sup>+</sup> CD27 <sup>+</sup> CD28 <sup>+</sup> cells    | 54 | 0.422 | 0.366 | -0.647 | 181 | 153 | 33  | 137.00 |
| 34                             | CRP                                                              | 62 | 0.589 | 0.264 | -0.351 | 159 | 113 | 118 | 137.25 |
| 35                             | 4-1BB                                                            | 62 | 0.432 | 0.305 | 2.204  | 212 | 126 | 5   | 138.75 |
| 36                             | IL-8                                                             | 62 | 0.609 | 0.170 | -0.161 | 121 | 77  | 240 | 139.75 |
| 37                             | EM CD4 <sup>+</sup> CD27 <sup>+</sup> CD28 <sup>+</sup> cells    | 54 | 0.404 | 0.267 | 0.216  | 138 | 115 | 195 | 146.50 |
| 38                             | TEMRA CD4 <sup>+</sup> cells                                     | 54 | 0.413 | 0.318 | 0.286  | 161 | 130 | 143 | 148.75 |

|    |                                                                  |    |       |       |        |     |     |     |        |
|----|------------------------------------------------------------------|----|-------|-------|--------|-----|-----|-----|--------|
| 39 | EM CD4 <sup>+</sup> CD27 <sup>+</sup> cells                      | 54 | 0.405 | 0.275 | 0.216  | 145 | 118 | 194 | 150.50 |
| 40 | CD8 <sup>+</sup> CD28 <sup>+</sup> cells                         | 54 | 0.598 | 0.259 | -0.153 | 134 | 111 | 250 | 157.25 |
| 41 | Age                                                              | 62 | 0.594 | 0.237 | -0.154 | 148 | 100 | 249 | 161.25 |
| 42 | CD4 <sup>+</sup> CD28 <sup>+</sup> cells                         | 54 | 0.618 | 0.168 | -0.024 | 99  | 75  | 372 | 161.25 |
| 43 | CD4 <sup>+</sup> CD27 <sup>-</sup> CD28 <sup>-</sup> cells       | 54 | 0.404 | 0.264 | 0.115  | 137 | 112 | 276 | 165.50 |
| 44 | let-7i                                                           | 62 | 0.432 | 0.395 | 0.392  | 213 | 166 | 101 | 173.25 |
| 45 | LAG-3                                                            | 62 | 0.436 | 0.424 | 0.431  | 221 | 182 | 79  | 175.75 |
| 46 | IL-1 $\alpha$                                                    | 62 | 0.582 | 0.306 | -0.174 | 175 | 127 | 229 | 176.50 |
| 47 | Classical monocytes                                              | 54 | 0.399 | 0.243 | 0.047  | 130 | 104 | 342 | 176.50 |
| 48 | EM CD4 <sup>+</sup> CD28 <sup>+</sup> cells                      | 54 | 0.418 | 0.346 | 0.186  | 174 | 144 | 220 | 178.00 |
| 49 | TIM-3                                                            | 62 | 0.564 | 0.424 | -0.421 | 222 | 183 | 88  | 178.75 |
| 50 | IP-10                                                            | 62 | 0.573 | 0.358 | -0.226 | 195 | 149 | 186 | 181.25 |
| 51 | TEMRA CD8 <sup>+</sup> CD57 <sup>+</sup> cells                   | 54 | 0.418 | 0.346 | 0.156  | 173 | 143 | 245 | 183.50 |
| 52 | EM CD4 <sup>+</sup> CD57 <sup>+</sup> cells                      | 54 | 0.417 | 0.337 | -0.121 | 169 | 140 | 268 | 186.50 |
| 53 | Naive Tregs                                                      | 54 | 0.412 | 0.309 | 0.088  | 160 | 129 | 299 | 187.00 |
| 54 | TEMRA CD8 <sup>+</sup> CD27 <sup>-</sup> CD28 <sup>-</sup> cells | 54 | 0.424 | 0.376 | 0.169  | 183 | 157 | 233 | 189.00 |
| 55 | miR-424                                                          | 62 | 0.563 | 0.429 | -0.288 | 226 | 186 | 140 | 194.50 |
| 56 | CD8 <sup>+</sup> CD27 <sup>-</sup> CD28 <sup>-</sup> cells       | 54 | 0.431 | 0.427 | 0.218  | 206 | 184 | 193 | 197.25 |
| 57 | EM CD8 <sup>+</sup> CD27 <sup>+</sup> CD28 <sup>+</sup> cells    | 54 | 0.562 | 0.473 | -0.308 | 231 | 201 | 132 | 198.75 |
| 58 | EM CD8 <sup>+</sup> cells                                        | 54 | 0.572 | 0.406 | -0.164 | 198 | 174 | 238 | 202.00 |
| 59 | Plasmacytoid dendritic cells                                     | 54 | 0.552 | 0.545 | -0.420 | 251 | 225 | 89  | 204.00 |
| 60 | TEMRA CD8 <sup>+</sup> cells                                     | 54 | 0.434 | 0.445 | 0.147  | 217 | 191 | 251 | 219.00 |
| 61 | CM CD8 <sup>+</sup> CD27 <sup>-</sup> CD28 <sup>-</sup> cells    | 54 | 0.454 | 0.595 | 0.487  | 276 | 254 | 71  | 219.25 |
| 62 | Tumor grade                                                      | 62 | 0.435 | 0.338 | 0.085  | 219 | 141 | 303 | 220.50 |
| 63 | miR-126                                                          | 62 | 0.442 | 0.465 | 0.194  | 238 | 198 | 210 | 221.00 |
| 64 | NK-cells                                                         | 54 | 0.428 | 0.406 | 0.048  | 199 | 175 | 338 | 227.75 |
| 65 | TNF- $\alpha$                                                    | 62 | 0.430 | 0.381 | -0.045 | 204 | 160 | 343 | 227.75 |
| 66 | IL-1 $\beta$                                                     | 62 | 0.433 | 0.398 | 0.041  | 216 | 168 | 347 | 236.75 |
| 67 | IL-17F                                                           | 62 | 0.520 | 0.599 | 1.006  | 344 | 256 | 16  | 240.00 |
| 68 | miR-21                                                           | 62 | 0.568 | 0.391 | -0.016 | 208 | 164 | 380 | 240.00 |
| 69 | Naive CD8 <sup>+</sup> CD27 <sup>-</sup> CD28 <sup>-</sup> cells | 54 | 0.441 | 0.497 | 0.112  | 237 | 210 | 278 | 240.50 |
| 70 | CM CD8 <sup>+</sup> CD57 <sup>+</sup> cells                      | 54 | 0.549 | 0.570 | 0.195  | 260 | 241 | 207 | 242.00 |
| 71 | Naive CD8 <sup>+</sup> CD57 <sup>+</sup> cells                   | 54 | 0.436 | 0.462 | -0.054 | 224 | 197 | 332 | 244.25 |
| 72 | Free active TGF- $\beta$ 1                                       | 62 | 0.486 | 0.588 | 2.572  | 364 | 247 | 3   | 244.50 |
| 73 | EM CD8 <sup>+</sup> CD27 <sup>+</sup> cells                      | 54 | 0.544 | 0.615 | -0.268 | 283 | 267 | 151 | 246.00 |
| 74 | TEMRA CD8 <sup>+</sup> CD27 <sup>+</sup> cells                   | 54 | 0.451 | 0.570 | 0.180  | 261 | 243 | 226 | 247.75 |
| 75 | miR-223                                                          | 62 | 0.445 | 0.488 | 0.096  | 247 | 207 | 291 | 248.00 |
| 76 | IL-10                                                            | 62 | 0.443 | 0.479 | -0.057 | 243 | 204 | 330 | 255.00 |
| 77 | CD8 <sup>+</sup> CD57 <sup>+</sup> cells                         | 54 | 0.453 | 0.593 | 0.166  | 274 | 253 | 234 | 258.75 |
| 78 | Naive CD4 <sup>+</sup> CD28 <sup>+</sup> cells                   | 54 | 0.547 | 0.589 | -0.155 | 270 | 248 | 247 | 258.75 |
| 79 | CM CD4 <sup>+</sup> cells                                        | 54 | 0.550 | 0.567 | -0.097 | 256 | 239 | 290 | 260.25 |
| 80 | CM CD4 <sup>+</sup> CD28 <sup>+</sup> cells                      | 54 | 0.550 | 0.567 | -0.096 | 257 | 240 | 292 | 261.50 |
| 81 | IL-27                                                            | 62 | 0.537 | 0.646 | -0.209 | 297 | 278 | 199 | 267.75 |
| 82 | Non-classical monocytes                                          | 54 | 0.547 | 0.593 | -0.108 | 272 | 252 | 281 | 269.25 |
| 83 | CD4 <sup>+</sup> Tregs                                           | 54 | 0.553 | 0.539 | -0.037 | 249 | 223 | 356 | 269.25 |

|     |                                                                  |    |       |       |        |     |     |     |        |
|-----|------------------------------------------------------------------|----|-------|-------|--------|-----|-----|-----|--------|
| 84  | Naive B-cells                                                    | 54 | 0.547 | 0.593 | -0.102 | 271 | 251 | 287 | 270.00 |
| 85  | miR-92a                                                          | 62 | 0.546 | 0.562 | -0.083 | 275 | 237 | 305 | 273.00 |
| 86  | EM CD4 <sup>+</sup> cells                                        | 54 | 0.453 | 0.589 | 0.059  | 273 | 249 | 327 | 280.50 |
| 87  | CTLA-4                                                           | 62 | 0.511 | 0.832 | -0.641 | 372 | 347 | 34  | 281.25 |
| 88  | IL12p70                                                          | 62 | 0.468 | 0.690 | -0.182 | 308 | 291 | 225 | 283.00 |
| 89  | Naive CD4 <sup>+</sup> cells                                     | 54 | 0.539 | 0.658 | -0.121 | 292 | 282 | 269 | 283.75 |
| 90  | TEMRA CD8 <sup>+</sup> CD27 <sup>+</sup> CD28 <sup>+</sup> cells | 54 | 0.463 | 0.668 | 0.120  | 296 | 284 | 271 | 286.75 |
| 91  | TEMRA CD4 <sup>+</sup> CD27 <sup>+</sup> cells                   | 54 | 0.451 | 0.570 | 0.005  | 259 | 242 | 398 | 289.50 |
| 92  | Naive CD4 <sup>+</sup> CD27 <sup>+</sup> cells                   | 54 | 0.533 | 0.712 | -0.132 | 307 | 299 | 260 | 293.25 |
| 93  | Naive CD4 <sup>+</sup> CD57 <sup>+</sup> cells                   | 54 | 0.467 | 0.703 | 0.115  | 303 | 294 | 275 | 293.75 |
| 94  | CD56 <sup>dim</sup> CD16 <sup>+</sup> NK-cells                   | 54 | 0.545 | 0.605 | -0.028 | 280 | 262 | 364 | 296.50 |
| 95  | EM CD8 <sup>+</sup> CD27 <sup>+</sup> CD28 <sup>+</sup> cells    | 54 | 0.486 | 0.882 | 0.386  | 365 | 364 | 103 | 299.25 |
| 96  | CD4 <sup>+</sup> CD27 <sup>+</sup> cells                         | 54 | 0.539 | 0.655 | -0.033 | 291 | 281 | 359 | 305.50 |
| 97  | miR-181a                                                         | 62 | 0.528 | 0.729 | -0.102 | 323 | 309 | 288 | 310.75 |
| 98  | CM CD4 <sup>+</sup> CD27 <sup>+</sup> CD28 <sup>+</sup> cells    | 54 | 0.496 | 0.969 | -0.430 | 389 | 390 | 80  | 312.00 |
| 99  | TEMRA CD4 <sup>+</sup> CD27 <sup>+</sup> CD28 <sup>+</sup> cells | 54 | 0.460 | 0.648 | -0.009 | 290 | 279 | 393 | 313.00 |
| 100 | Naive CD4 <sup>+</sup> CD27 <sup>+</sup> CD28 <sup>+</sup> cells | 54 | 0.526 | 0.768 | -0.119 | 328 | 326 | 273 | 313.75 |
| 101 | Myeloid dendritic cells                                          | 54 | 0.525 | 0.773 | -0.130 | 333 | 328 | 262 | 314.00 |
| 102 | let-7e                                                           | 62 | 0.474 | 0.752 | 0.113  | 330 | 319 | 277 | 314.00 |
| 103 | CM CD4 <sup>+</sup> CD27 <sup>+</sup> cells                      | 54 | 0.531 | 0.726 | -0.052 | 311 | 304 | 335 | 315.25 |
| 104 | TEMRA CD8 <sup>+</sup> CD28 <sup>+</sup> cells                   | 54 | 0.530 | 0.730 | 0.060  | 314 | 310 | 324 | 315.50 |
| 105 | miR-19b                                                          | 62 | 0.529 | 0.723 | -0.068 | 322 | 302 | 318 | 316.00 |
| 106 | miR-155                                                          | 62 | 0.507 | 0.934 | -0.328 | 380 | 380 | 126 | 316.50 |
| 107 | CD4 <sup>+</sup> CD27 <sup>+</sup> CD28 <sup>+</sup> cells       | 54 | 0.533 | 0.712 | -0.027 | 306 | 298 | 368 | 319.50 |
| 108 | miR-125b                                                         | 62 | 0.532 | 0.695 | 0.027  | 310 | 293 | 367 | 320.00 |
| 109 | CM CD4 <sup>+</sup> CD27 <sup>+</sup> CD28 <sup>+</sup> cells    | 54 | 0.529 | 0.744 | -0.052 | 321 | 314 | 334 | 322.50 |
| 110 | CM CD4 <sup>+</sup> CD57 <sup>+</sup> cells                      | 54 | 0.494 | 0.955 | 0.288  | 384 | 385 | 141 | 323.50 |
| 111 | TEMRA CD4 <sup>+</sup> CD28 <sup>+</sup> cells                   | 54 | 0.469 | 0.726 | -0.018 | 312 | 305 | 378 | 326.75 |
| 112 | CD8 <sup>+</sup> CD27 <sup>+</sup> cells                         | 54 | 0.527 | 0.759 | -0.048 | 325 | 322 | 340 | 328.00 |
| 113 | Class-switched memory B-cells                                    | 54 | 0.474 | 0.766 | 0.054  | 329 | 325 | 331 | 328.50 |
| 114 | CD8 <sup>+</sup> CD27 <sup>+</sup> CD28 <sup>+</sup> cells       | 54 | 0.523 | 0.794 | -0.078 | 336 | 337 | 311 | 330.00 |
| 115 | Hematopoietic stem cells                                         | 54 | 0.509 | 0.925 | -0.198 | 376 | 377 | 204 | 333.25 |
| 116 | miR-20a                                                          | 62 | 0.528 | 0.729 | -0.017 | 324 | 308 | 379 | 333.75 |
| 117 | CD3 <sup>+</sup> cells                                           | 54 | 0.529 | 0.737 | -0.005 | 319 | 311 | 399 | 337.00 |
| 118 | miR-19a                                                          | 62 | 0.519 | 0.815 | -0.069 | 347 | 341 | 317 | 338.00 |
| 119 | CD86                                                             | 62 | 0.483 | 0.840 | -0.087 | 353 | 353 | 301 | 340.00 |
| 120 | B-cells                                                          | 54 | 0.518 | 0.839 | -0.070 | 350 | 351 | 315 | 341.50 |
| 121 | IFN- $\gamma$                                                    | 62 | 0.480 | 0.803 | -0.041 | 343 | 339 | 346 | 342.75 |
| 122 | EM CD8 <sup>+</sup> CD57 <sup>+</sup> cells                      | 54 | 0.501 | 1.000 | 0.228  | 399 | 399 | 184 | 345.25 |
| 123 | Naive CD8 <sup>+</sup> cells                                     | 54 | 0.490 | 0.912 | 0.129  | 374 | 372 | 263 | 345.75 |
| 124 | miR-326                                                          | 62 | 0.516 | 0.819 | 0.039  | 354 | 343 | 351 | 350.50 |
| 125 | Non-switched memory B-cells                                      | 54 | 0.504 | 0.971 | 0.160  | 390 | 391 | 241 | 353.00 |
| 126 | Naive CD8 <sup>+</sup> CD27 <sup>+</sup> CD28 <sup>+</sup> cells | 54 | 0.494 | 0.956 | 0.138  | 385 | 386 | 257 | 353.25 |
| 127 | Lymph node involvement                                           | 62 | 0.512 | 0.869 | -0.067 | 368 | 361 | 319 | 354.00 |
| 128 | sCD27                                                            | 62 | 0.492 | 0.923 | -0.089 | 378 | 375 | 298 | 357.25 |

|                       |                                                                  |    |       |       |        |     |     |     |        |
|-----------------------|------------------------------------------------------------------|----|-------|-------|--------|-----|-----|-----|--------|
| 129                   | miR-18a                                                          | 62 | 0.514 | 0.862 | -0.036 | 359 | 357 | 357 | 358.00 |
| 130                   | PD-L2                                                            | 62 | 0.512 | 0.887 | -0.051 | 369 | 366 | 337 | 360.25 |
| 131                   | Naive CD8 <sup>+</sup> CD27 <sup>+</sup> cells                   | 54 | 0.498 | 0.985 | 0.132  | 394 | 393 | 261 | 360.50 |
| 132                   | sCD25                                                            | 62 | 0.501 | 0.994 | -0.147 | 397 | 396 | 254 | 361.00 |
| 133                   | Naive CD8 <sup>+</sup> CD28 <sup>+</sup> cells                   | 54 | 0.499 | 1.000 | 0.135  | 398 | 398 | 258 | 363.00 |
| 134                   | miR-17                                                           | 62 | 0.510 | 0.910 | 0.007  | 375 | 371 | 397 | 379.50 |
| LOW sTIL INFILTRATION |                                                                  |    |       |       |        |     |     |     |        |
| 1                     | TEMRA CD4 <sup>+</sup> CD57 <sup>+</sup> cells                   | 54 | 0.707 | 0.011 | -0.879 | 11  | 3   | 21  | 11.50  |
| 2                     | TEMRA CD4 <sup>+</sup> CD27 <sup>-</sup> CD28 <sup>-</sup> cells | 54 | 0.679 | 0.027 | -0.785 | 22  | 7   | 25  | 19.00  |
| 3                     | Tregs                                                            | 54 | 0.313 | 0.021 | 0.567  | 17  | 6   | 50  | 22.50  |
| 4                     | PD-L1                                                            | 62 | 0.657 | 0.038 | -0.674 | 40  | 12  | 32  | 31.00  |
| 5                     | EM CD8 <sup>+</sup> CD28 <sup>+</sup> cells                      | 54 | 0.324 | 0.029 | 0.496  | 24  | 8   | 69  | 31.25  |
| 6                     | NK-like T-cells                                                  | 54 | 0.651 | 0.062 | -0.637 | 47  | 19  | 36  | 37.25  |
| 7                     | miR-195                                                          | 62 | 0.642 | 0.060 | -0.758 | 62  | 18  | 27  | 42.25  |
| 8                     | CD4 <sup>+</sup> CD57 <sup>+</sup> cells                         | 54 | 0.648 | 0.068 | -0.606 | 52  | 23  | 44  | 42.75  |
| 9                     | Intermediate monocytes                                           | 54 | 0.327 | 0.032 | 0.328  | 27  | 9   | 125 | 47.00  |
| 10                    | MCP-1                                                            | 62 | 0.313 | 0.013 | 0.255  | 16  | 4   | 167 | 50.75  |
| 11                    | CD8 <sup>+</sup> cells                                           | 54 | 0.658 | 0.051 | -0.350 | 37  | 14  | 119 | 51.75  |
| 12                    | TEMRA CD8 <sup>+</sup> CD27 <sup>-</sup> CD28 <sup>-</sup> cells | 54 | 0.650 | 0.065 | -0.408 | 48  | 20  | 94  | 52.50  |
| 13                    | TIM-3                                                            | 62 | 0.365 | 0.075 | 0.609  | 72  | 28  | 41  | 53.25  |
| 14                    | TEMRA CD8 <sup>+</sup> CD57 <sup>+</sup> cells                   | 54 | 0.649 | 0.066 | -0.343 | 49  | 22  | 120 | 60.00  |
| 15                    | CD4 <sup>+</sup> CD27 <sup>-</sup> CD28 <sup>-</sup> cells       | 54 | 0.634 | 0.100 | -0.544 | 73  | 40  | 57  | 60.75  |
| 16                    | EM CD8 <sup>+</sup> cells                                        | 54 | 0.354 | 0.071 | 0.315  | 56  | 26  | 130 | 67.00  |
| 17                    | Tumor grade                                                      | 62 | 0.664 | 0.010 | -0.208 | 33  | 2   | 202 | 67.50  |
| 18                    | Naive CD4 <sup>+</sup> CD27 <sup>-</sup> CD28 <sup>-</sup> cells | 54 | 0.621 | 0.137 | -0.869 | 93  | 63  | 22  | 67.75  |
| 19                    | CD4/CD8 ratio                                                    | 54 | 0.376 | 0.126 | 0.555  | 86  | 54  | 52  | 69.50  |
| 20                    | Gal-9                                                            | 62 | 0.377 | 0.105 | 0.515  | 88  | 42  | 66  | 71.00  |
| 21                    | 4-1BB                                                            | 62 | 0.607 | 0.089 | -2.274 | 124 | 33  | 4   | 71.25  |
| 22                    | TEMRA CD8 <sup>+</sup> cells                                     | 54 | 0.639 | 0.086 | -0.320 | 66  | 31  | 128 | 72.75  |
| 23                    | Monocytes                                                        | 54 | 0.653 | 0.058 | -0.223 | 44  | 17  | 189 | 73.50  |
| 24                    | IL-6                                                             | 62 | 0.383 | 0.123 | 0.554  | 101 | 52  | 53  | 76.75  |
| 25                    | CD8 <sup>+</sup> CD28 <sup>+</sup> cells                         | 54 | 0.354 | 0.071 | 0.244  | 55  | 25  | 174 | 77.25  |
| 26                    | miR-424                                                          | 62 | 0.379 | 0.110 | 0.419  | 91  | 46  | 91  | 79.75  |
| 27                    | TEMRA CD8 <sup>+</sup> CD27 <sup>+</sup> cells                   | 54 | 0.624 | 0.128 | -0.356 | 87  | 57  | 114 | 86.25  |
| 28                    | CD8 <sup>+</sup> CD27 <sup>-</sup> CD28 <sup>-</sup> cells       | 54 | 0.622 | 0.133 | -0.360 | 89  | 61  | 112 | 87.75  |
| 29                    | EM CD4 <sup>+</sup> CD57 <sup>+</sup> cells                      | 54 | 0.614 | 0.159 | -0.426 | 109 | 70  | 82  | 92.50  |
| 30                    | EM CD4 <sup>+</sup> CD27 <sup>-</sup> CD28 <sup>-</sup> cells    | 54 | 0.631 | 0.107 | -0.232 | 80  | 44  | 180 | 96.00  |
| 31                    | Tumor size                                                       | 62 | 0.384 | 0.121 | 0.331  | 108 | 49  | 123 | 97.00  |
| 32                    | CD4 <sup>+</sup> CD28 <sup>+</sup> cells                         | 54 | 0.344 | 0.054 | 0.086  | 41  | 15  | 302 | 99.75  |
| 33                    | G8 score                                                         | 27 | 0.321 | 0.132 | 0.085  | 21  | 60  | 304 | 101.50 |
| 34                    | TEMRA CD4 <sup>+</sup> cells                                     | 54 | 0.614 | 0.163 | -0.359 | 112 | 73  | 113 | 102.50 |
| 35                    | CRP                                                              | 62 | 0.398 | 0.179 | 0.422  | 128 | 79  | 85  | 105.00 |
| 36                    | CD4 <sup>+</sup> cells                                           | 54 | 0.384 | 0.153 | 0.268  | 102 | 68  | 154 | 106.50 |
| 37                    | Age                                                              | 62 | 0.378 | 0.108 | 0.185  | 90  | 45  | 223 | 112.00 |
| 38                    | Naive CD8 <sup>+</sup> CD27 <sup>-</sup> CD28 <sup>-</sup> cells | 54 | 0.607 | 0.187 | -0.311 | 123 | 81  | 131 | 114.50 |

|    |                                                                  |    |       |       |        |     |     |     |        |
|----|------------------------------------------------------------------|----|-------|-------|--------|-----|-----|-----|--------|
| 39 | miR-150                                                          | 62 | 0.595 | 0.212 | -0.425 | 144 | 90  | 83  | 115.25 |
| 40 | IL-1 $\alpha$                                                    | 62 | 0.389 | 0.143 | 0.239  | 114 | 66  | 176 | 117.50 |
| 41 | EM CD4 <sup>+</sup> CD27 <sup>+</sup> CD28 <sup>+</sup> cells    | 54 | 0.404 | 0.238 | 0.402  | 142 | 101 | 96  | 120.25 |
| 42 | T-cell P16 <sup>INK4a</sup>                                      | 42 | 0.641 | 0.123 | -0.079 | 64  | 51  | 310 | 122.25 |
| 43 | Classical monocytes                                              | 54 | 0.636 | 0.093 | -0.048 | 70  | 36  | 339 | 128.75 |
| 44 | IL-17A                                                           | 62 | 0.574 | 0.329 | -1.716 | 192 | 136 | 8   | 132.00 |
| 45 | TEMRA CD8 <sup>+</sup> CD27 <sup>+</sup> CD28 <sup>+</sup> cells | 54 | 0.597 | 0.235 | -0.261 | 136 | 99  | 159 | 132.50 |
| 46 | miR-9                                                            | 62 | 0.569 | 0.291 | -1.123 | 207 | 122 | 12  | 137.00 |
| 47 | CD8 <sup>+</sup> CD57 <sup>+</sup> cells                         | 54 | 0.595 | 0.244 | -0.250 | 143 | 105 | 169 | 140.00 |
| 48 | IGF-1                                                            | 62 | 0.604 | 0.170 | -0.156 | 126 | 76  | 244 | 143.00 |
| 49 | CD4 <sup>+</sup> Tregs                                           | 54 | 0.401 | 0.221 | 0.189  | 133 | 95  | 216 | 144.25 |
| 50 | IP-10                                                            | 62 | 0.414 | 0.254 | 0.260  | 162 | 107 | 162 | 148.25 |
| 51 | IL-8                                                             | 62 | 0.406 | 0.214 | 0.192  | 146 | 91  | 214 | 149.25 |
| 52 | EM CD8 <sup>+</sup> CD27 <sup>+</sup> cells                      | 54 | 0.420 | 0.329 | 0.381  | 179 | 135 | 106 | 149.75 |
| 53 | miR-181a                                                         | 62 | 0.419 | 0.288 | 0.260  | 176 | 121 | 161 | 158.50 |
| 54 | miR-126                                                          | 62 | 0.576 | 0.319 | -0.263 | 184 | 131 | 158 | 164.25 |
| 55 | CM CD8 <sup>+</sup> CD28 <sup>+</sup> cells                      | 54 | 0.426 | 0.365 | 0.332  | 193 | 152 | 122 | 165.00 |
| 56 | miR-146a                                                         | 62 | 0.575 | 0.322 | -0.259 | 190 | 133 | 164 | 169.25 |
| 57 | CM CD8 <sup>+</sup> cells                                        | 54 | 0.427 | 0.369 | 0.275  | 196 | 154 | 148 | 173.50 |
| 58 | CM CD8 <sup>+</sup> CD27 <sup>+</sup> CD28 <sup>+</sup> cells    | 54 | 0.425 | 0.358 | 0.249  | 188 | 150 | 171 | 174.25 |
| 59 | miR-223                                                          | 62 | 0.572 | 0.344 | -0.222 | 200 | 142 | 192 | 183.50 |
| 60 | CD56 <sup>bright</sup> CD16 <sup>-</sup> NK-cells                | 54 | 0.578 | 0.337 | -0.166 | 180 | 139 | 235 | 183.50 |
| 61 | Naive CD4 <sup>+</sup> CD28 <sup>+</sup> cells                   | 54 | 0.429 | 0.384 | 0.213  | 201 | 161 | 197 | 190.00 |
| 62 | Hematopoietic stem cells                                         | 54 | 0.439 | 0.452 | 0.396  | 234 | 196 | 99  | 190.75 |
| 63 | Naive CD4 <sup>+</sup> CD57 <sup>+</sup> cells                   | 54 | 0.565 | 0.428 | -0.266 | 220 | 185 | 156 | 195.25 |
| 64 | Non-classical monocytes                                          | 54 | 0.425 | 0.358 | 0.144  | 189 | 151 | 255 | 196.00 |
| 65 | CM CD8 <sup>+</sup> CD27 <sup>+</sup> cells                      | 54 | 0.432 | 0.403 | 0.216  | 211 | 169 | 196 | 196.75 |
| 66 | CM CD8 <sup>+</sup> CD27 <sup>+</sup> CD28 <sup>-</sup> cells    | 54 | 0.553 | 0.520 | -0.463 | 250 | 217 | 74  | 197.75 |
| 67 | PD-1                                                             | 62 | 0.593 | 0.220 | -0.003 | 150 | 94  | 400 | 198.50 |
| 68 | sCD25                                                            | 62 | 0.442 | 0.450 | 0.291  | 241 | 195 | 138 | 203.75 |
| 69 | Naive CD8 <sup>+</sup> CD57 <sup>+</sup> cells                   | 54 | 0.590 | 0.267 | -0.008 | 157 | 116 | 394 | 206.00 |
| 70 | Memory Tregs                                                     | 54 | 0.428 | 0.377 | 0.118  | 197 | 158 | 274 | 206.50 |
| 71 | Naive CD4 <sup>+</sup> CD27 <sup>+</sup> cells                   | 54 | 0.438 | 0.447 | 0.193  | 229 | 194 | 213 | 216.25 |
| 72 | Naive CD4 <sup>+</sup> cells                                     | 54 | 0.438 | 0.447 | 0.185  | 228 | 193 | 222 | 217.75 |
| 73 | CD8 <sup>+</sup> CD27 <sup>+</sup> CD28 <sup>+</sup> cells       | 54 | 0.438 | 0.444 | 0.147  | 230 | 190 | 253 | 225.75 |
| 74 | LAG-3                                                            | 62 | 0.549 | 0.521 | -0.256 | 262 | 218 | 165 | 226.75 |
| 75 | EM CD8 <sup>+</sup> CD27 <sup>+</sup> CD28 <sup>+</sup> cells    | 54 | 0.563 | 0.447 | -0.125 | 227 | 192 | 266 | 228.00 |
| 76 | IL-10                                                            | 62 | 0.552 | 0.491 | 0.166  | 252 | 208 | 236 | 237.00 |
| 77 | CD4 <sup>+</sup> CD27 <sup>+</sup> cells                         | 54 | 0.436 | 0.433 | 0.071  | 223 | 188 | 314 | 237.00 |
| 78 | EM CD4 <sup>+</sup> CD27 <sup>+</sup> cells                      | 54 | 0.558 | 0.479 | -0.128 | 240 | 206 | 264 | 237.50 |
| 79 | CD8 <sup>+</sup> CD27 <sup>+</sup> cells                         | 54 | 0.441 | 0.470 | 0.107  | 236 | 200 | 282 | 238.50 |
| 80 | Naive CD4 <sup>+</sup> CD27 <sup>+</sup> CD28 <sup>+</sup> cells | 54 | 0.449 | 0.535 | 0.180  | 253 | 222 | 227 | 238.75 |
| 81 | CD4 <sup>+</sup> CD27 <sup>+</sup> CD28 <sup>+</sup> cells       | 54 | 0.442 | 0.479 | 0.067  | 239 | 205 | 320 | 250.75 |
| 82 | TNF- $\alpha$                                                    | 62 | 0.546 | 0.546 | 0.164  | 277 | 226 | 239 | 254.75 |
| 83 | IL-27                                                            | 62 | 0.462 | 0.615 | 0.244  | 293 | 268 | 175 | 257.25 |



|     |                                                                  |    |       |       |        |     |     |     |        |
|-----|------------------------------------------------------------------|----|-------|-------|--------|-----|-----|-----|--------|
| 84  | Naive B-cells                                                    | 54 | 0.450 | 0.547 | 0.102  | 258 | 227 | 289 | 258.00 |
| 85  | CM CD4 <sup>+</sup> CD27 <sup>+</sup> CD28 <sup>+</sup> cells    | 54 | 0.541 | 0.601 | 0.200  | 287 | 257 | 203 | 258.50 |
| 86  | Non-switched memory B-cells                                      | 54 | 0.538 | 0.644 | -0.248 | 294 | 277 | 172 | 259.25 |
| 87  | CTLA-4                                                           | 62 | 0.532 | 0.516 | -0.194 | 309 | 216 | 212 | 261.50 |
| 88  | miR-19a                                                          | 62 | 0.455 | 0.551 | 0.135  | 279 | 231 | 259 | 262.00 |
| 89  | B-cells                                                          | 54 | 0.452 | 0.558 | 0.090  | 264 | 233 | 297 | 264.50 |
| 90  | Free active TGF- $\beta$ 1                                       | 62 | 0.507 | 0.779 | -2.067 | 382 | 333 | 6   | 275.75 |
| 91  | CD86                                                             | 62 | 0.467 | 0.669 | 0.194  | 304 | 285 | 211 | 276.00 |
| 92  | IL-1 $\beta$                                                     | 62 | 0.544 | 0.565 | 0.069  | 282 | 238 | 316 | 279.50 |
| 93  | EM CD4 <sup>+</sup> cells                                        | 54 | 0.543 | 0.604 | -0.090 | 286 | 261 | 296 | 282.25 |
| 94  | Lymph node involvement                                           | 62 | 0.470 | 0.648 | 0.171  | 313 | 280 | 230 | 284.00 |
| 95  | miR-20a                                                          | 62 | 0.538 | 0.621 | -0.105 | 295 | 269 | 283 | 285.50 |
| 96  | Plasmacytoid dendritic cells                                     | 54 | 0.483 | 0.840 | 0.277  | 352 | 352 | 147 | 300.75 |
| 97  | let-7e                                                           | 62 | 0.464 | 0.641 | 0.053  | 298 | 274 | 333 | 300.75 |
| 98  | CM CD4 <sup>+</sup> CD57 <sup>+</sup> cells                      | 54 | 0.523 | 0.785 | -0.209 | 337 | 334 | 200 | 302.00 |
| 99  | miR-326                                                          | 62 | 0.466 | 0.609 | 0.041  | 302 | 264 | 345 | 303.25 |
| 100 | CM CD8 <sup>+</sup> CD57 <sup>+</sup> cells                      | 54 | 0.514 | 0.867 | -0.291 | 361 | 359 | 137 | 304.50 |
| 101 | sCD27                                                            | 62 | 0.529 | 0.711 | 0.103  | 320 | 297 | 286 | 305.75 |
| 102 | EM CD8 <sup>+</sup> CD57 <sup>+</sup> cells                      | 54 | 0.470 | 0.720 | -0.074 | 315 | 301 | 312 | 310.75 |
| 103 | IL-17F                                                           | 62 | 0.501 | 1.000 | -0.544 | 401 | 401 | 56  | 314.75 |
| 104 | miR-18a                                                          | 62 | 0.473 | 0.725 | 0.083  | 326 | 303 | 306 | 315.25 |
| 105 | Myeloid dendritic cells                                          | 54 | 0.474 | 0.758 | 0.109  | 332 | 321 | 279 | 316.00 |
| 106 | TEMRA CD4 <sup>+</sup> CD27 <sup>+</sup> cells                   | 54 | 0.535 | 0.673 | -0.008 | 299 | 286 | 396 | 320.00 |
| 107 | IL12p70                                                          | 62 | 0.495 | 0.954 | 0.330  | 387 | 384 | 124 | 320.50 |
| 108 | miR-21                                                           | 62 | 0.466 | 0.662 | 0.003  | 301 | 283 | 401 | 321.50 |
| 109 | EM CD8 <sup>+</sup> CD27 <sup>+</sup> CD28 <sup>+</sup> cells    | 54 | 0.486 | 0.867 | -0.197 | 362 | 360 | 205 | 322.25 |
| 110 | let-7i                                                           | 62 | 0.488 | 0.880 | -0.222 | 370 | 362 | 191 | 323.25 |
| 111 | EM CD4 <sup>+</sup> CD28 <sup>+</sup> cells                      | 54 | 0.523 | 0.787 | -0.059 | 338 | 336 | 328 | 335.00 |
| 112 | miR-155                                                          | 62 | 0.515 | 0.846 | -0.108 | 358 | 354 | 280 | 337.50 |
| 113 | CM CD4 <sup>+</sup> CD28 <sup>+</sup> cells                      | 54 | 0.482 | 0.827 | 0.081  | 348 | 346 | 308 | 337.50 |
| 114 | Naive Tregs                                                      | 54 | 0.524 | 0.773 | -0.030 | 334 | 329 | 361 | 339.50 |
| 115 | NK-cells                                                         | 54 | 0.524 | 0.773 | -0.030 | 335 | 330 | 362 | 340.50 |
| 116 | Naive CD8 <sup>+</sup> CD28 <sup>+</sup> cells                   | 54 | 0.477 | 0.785 | 0.033  | 339 | 335 | 358 | 342.75 |
| 117 | CM CD4 <sup>+</sup> cells                                        | 54 | 0.484 | 0.855 | 0.082  | 357 | 355 | 307 | 344.00 |
| 118 | CD56 <sup>dim</sup> CD16 <sup>+</sup> NK-cells                   | 54 | 0.474 | 0.760 | 0.010  | 331 | 323 | 391 | 344.00 |
| 119 | TEMRA CD4 <sup>+</sup> CD27 <sup>+</sup> CD28 <sup>+</sup> cells | 54 | 0.519 | 0.819 | 0.029  | 346 | 344 | 363 | 349.75 |
| 120 | CD3 <sup>+</sup> cells                                           | 54 | 0.479 | 0.799 | 0.014  | 341 | 338 | 383 | 350.75 |
| 121 | miR-19b                                                          | 62 | 0.486 | 0.863 | 0.066  | 366 | 358 | 322 | 353.00 |
| 122 | miR-92a                                                          | 62 | 0.482 | 0.813 | -0.012 | 349 | 340 | 388 | 356.50 |
| 123 | IFN- $\gamma$                                                    | 62 | 0.503 | 0.971 | 0.119  | 393 | 392 | 272 | 362.50 |
| 124 | Naive CD8 <sup>+</sup> CD27 <sup>+</sup> cells                   | 54 | 0.487 | 0.881 | 0.038  | 367 | 363 | 353 | 362.50 |
| 125 | TEMRA CD8 <sup>+</sup> CD28 <sup>+</sup> cells                   | 54 | 0.489 | 0.902 | -0.051 | 373 | 370 | 336 | 363.00 |
| 126 | miR-125b                                                         | 62 | 0.505 | 0.948 | -0.087 | 386 | 383 | 300 | 363.75 |
| 127 | Naive CD8 <sup>+</sup> CD27 <sup>+</sup> CD28 <sup>+</sup> cells | 54 | 0.489 | 0.896 | 0.037  | 371 | 368 | 355 | 366.25 |
| 128 | TEMRA CD4 <sup>+</sup> CD28 <sup>+</sup> cells                   | 54 | 0.509 | 0.924 | 0.048  | 377 | 376 | 341 | 367.75 |

|     |                                                               |    |       |       |        |     |     |     |        |
|-----|---------------------------------------------------------------|----|-------|-------|--------|-----|-----|-----|--------|
| 129 | Naive CD8 <sup>+</sup> cells                                  | 54 | 0.493 | 0.937 | 0.013  | 381 | 381 | 386 | 382.25 |
| 130 | CM CD4 <sup>+</sup> CD27 <sup>+</sup> CD28 <sup>+</sup> cells | 54 | 0.506 | 0.944 | 0.013  | 383 | 382 | 387 | 383.75 |
| 131 | miR-17                                                        | 62 | 0.504 | 0.966 | -0.025 | 391 | 389 | 371 | 385.50 |
| 132 | CM CD4 <sup>+</sup> CD27 <sup>+</sup> cells                   | 54 | 0.504 | 0.965 | 0.013  | 388 | 388 | 384 | 387.00 |
| 133 | PD-L2                                                         | 62 | 0.498 | 0.989 | 0.025  | 396 | 394 | 370 | 389.00 |
| 134 | Class-switched memory B-cells                                 | 54 | 0.499 | 1.000 | 0.013  | 400 | 400 | 385 | 396.25 |
