# Supplementary material for: Blood Immunosenescence Signatures Reflecting Age, Frailty and Tumor Immune Infiltrate in Patients with Early Luminal Breast Cancer
Source: MDPI journal article supplement (doi:10.3390/cancers13092185), 2021-05-02
Supplement: s1 [file s1]

Table S2: Individual performances of biomarkers classification of frailty groups (fitter older patients: G8>14 and frailer older patients: G8≤14). The table reports the number of patients (N) for which the biomarkers could be measured, as well as the area under the curve (AUC) via receiver operating characteristics (ROC), P-value (Wilcoxon rank-sum test) and log fold change (FC) for each biomarker. The log FC compared case vs. control. A positive log FC indicates that the measurement is higher than its reference while a negative measurement indicates that is smaller. Based on these statistics AUC, P-value, log FC scores were computed. The final score combines the 3 scores, where AUC weighted double. The biomarkers are ranked based on their final score.

|    | Blood markers                                                    | N  | AUC   | P-value | log FC | AUC score | P-value score | log FC score | Final score |
|----|------------------------------------------------------------------|----|-------|---------|--------|-----------|---------------|--------------|-------------|
| 1  | NK-like T-cells                                                  | 25 | 0.941 | < 0.001 | -1.623 | 1         | 1             | 6            | 2.25        |
| 2  | TEMRA CD8 <sup>+</sup> CD57 <sup>+</sup> cells                   | 25 | 0.860 | 0.003   | -0.980 | 2         | 2             | 14           | 5.00        |
| 3  | T-cell P16 <sup>INK4a</sup>                                      | 20 | 0.798 | 0.041   | -1.937 | 7         | 8             | 4            | 6.50        |
| 4  | TEMRA CD8 <sup>+</sup> CD27 <sup>+</sup> CD28 <sup>-</sup> cells | 25 | 0.816 | 0.011   | -0.897 | 5         | 5             | 17           | 8.00        |
| 5  | CD8 <sup>+</sup> CD27 <sup>+</sup> CD28 <sup>-</sup> cells       | 25 | 0.816 | 0.011   | -0.754 | 4         | 4             | 30           | 10.50       |
| 6  | CD8 <sup>+</sup> CD57 <sup>+</sup> cells                         | 25 | 0.846 | 0.005   | -0.671 | 3         | 3             | 36           | 11.25       |
| 7  | EM CD4 <sup>+</sup> CD57 <sup>+</sup> cells                      | 25 | 0.743 | 0.057   | -1.070 | 11        | 13            | 13           | 12.00       |
| 8  | TEMRA CD8 <sup>+</sup> CD27 <sup>+</sup> CD28 <sup>+</sup> cells | 25 | 0.243 | 0.044   | 0.771  | 10        | 9             | 26           | 13.75       |
| 9  | TEMRA CD4 <sup>+</sup> CD57 <sup>+</sup> cells                   | 25 | 0.728 | 0.076   | -1.198 | 14        | 19            | 9            | 14.00       |
| 10 | CD8 <sup>+</sup> CD27 <sup>+</sup> CD28 <sup>+</sup> cells       | 25 | 0.221 | 0.027   | 0.710  | 8         | 7             | 33           | 14.00       |
| 11 | CD8 <sup>+</sup> CD28 <sup>+</sup> cells                         | 25 | 0.191 | 0.013   | 0.629  | 6         | 6             | 43           | 15.25       |
| 12 | CD4 <sup>+</sup> CD27 <sup>+</sup> CD28 <sup>-</sup> cells       | 25 | 0.721 | 0.086   | -1.171 | 16        | 20            | 10           | 15.50       |
| 13 | CD8 <sup>+</sup> CD27 <sup>+</sup> cells                         | 25 | 0.243 | 0.044   | 0.652  | 9         | 10            | 38           | 16.50       |
| 14 | CM CD8 <sup>+</sup> cells                                        | 25 | 0.279 | 0.086   | 0.902  | 17        | 21            | 16           | 17.75       |
| 15 | CM CD8 <sup>+</sup> CD27 <sup>+</sup> cells                      | 25 | 0.287 | 0.097   | 0.910  | 20        | 24            | 15           | 19.75       |
| 16 | Gal-9                                                            | 29 | 0.716 | 0.062   | -0.656 | 18        | 15            | 37           | 22.00       |
| 17 | CD4 <sup>+</sup> CD57 <sup>+</sup> cells                         | 25 | 0.706 | 0.110   | -1.077 | 25        | 28            | 12           | 22.50       |
| 18 | TEMRA CD8 <sup>+</sup> CD27 <sup>+</sup> cells                   | 25 | 0.257 | 0.057   | 0.512  | 12        | 14            | 53           | 22.75       |
| 19 | Naive CD8 <sup>+</sup> CD27 <sup>+</sup> CD28 <sup>-</sup> cells | 25 | 0.713 | 0.097   | -0.756 | 21        | 22            | 28           | 23.00       |
| 20 | CD4 <sup>+</sup> Tregs                                           | 25 | 0.287 | 0.097   | 0.735  | 19        | 23            | 32           | 23.25       |
| 21 | CM CD8 <sup>+</sup> CD28 <sup>+</sup> cells                      | 25 | 0.294 | 0.109   | 0.887  | 27        | 27            | 18           | 24.75       |
| 22 | miR-9                                                            | 29 | 0.342 | 0.056   |        | 45        | 12            | 1            | 25.75       |
| 23 | EM CD4 <sup>+</sup> CD27 <sup>+</sup> CD28 <sup>-</sup> cells    | 25 | 0.684 | 0.153   | -1.247 | 33        | 35            | 8            | 27.25       |
| 24 | CM CD8 <sup>+</sup> CD27 <sup>+</sup> CD28 <sup>+</sup> cells    | 25 | 0.301 | 0.124   | 0.882  | 29        | 32            | 19           | 27.25       |
| 25 | miR-20a                                                          | 29 | 0.721 | 0.056   | -0.359 | 15        | 11            | 69           | 27.50       |
| 26 | TEMRA CD4 <sup>+</sup> CD27 <sup>+</sup> CD28 <sup>-</sup> cells | 25 | 0.684 | 0.157   | -1.086 | 34        | 36            | 11           | 28.75       |
| 27 | CM CD4 <sup>+</sup> CD27 <sup>+</sup> cells                      | 25 | 0.301 | 0.124   | 0.756  | 28        | 31            | 29           | 29.00       |
| 28 | CD56 <sup>bright</sup> CD16 <sup>-</sup> NK-cells                | 25 | 0.301 | 0.123   | 0.693  | 30        | 30            | 34           | 31.00       |
| 29 | TEMRA CD8 <sup>+</sup> cells                                     | 25 | 0.713 | 0.097   | -0.503 | 22        | 25            | 55           | 31.00       |
| 30 | sCD25                                                            | 29 | 0.711 | 0.069   | -0.448 | 23        | 17            | 61           | 31.00       |
| 31 | CM CD4 <sup>+</sup> CD27 <sup>+</sup> CD28 <sup>+</sup> cells    | 25 | 0.309 | 0.140   | 0.753  | 31        | 34            | 31           | 31.75       |
| 32 | miR-195                                                          | 29 | 0.711 | 0.069   | -0.426 | 24        | 18            | 62           | 32.00       |
| 33 | CM CD4 <sup>+</sup> CD28 <sup>+</sup> cells                      | 25 | 0.331 | 0.194   | 0.809  | 41        | 46            | 21           | 37.25       |
| 34 | CM CD4 <sup>+</sup> cells                                        | 25 | 0.338 | 0.215   | 0.796  | 42        | 47            | 23           | 38.50       |
| 35 | Naive CD8 <sup>+</sup> CD27 <sup>+</sup> cells                   | 25 | 0.324 | 0.175   | 0.592  | 36        | 38            | 46           | 39.00       |
| 36 | Naive CD8 <sup>+</sup> CD28 <sup>+</sup> cells                   | 25 | 0.324 | 0.175   | 0.633  | 38        | 40            | 41           | 39.25       |
| 37 | Naive CD8 <sup>+</sup> CD27 <sup>+</sup> CD28 <sup>+</sup> cells | 25 | 0.324 | 0.175   | 0.606  | 37        | 39            | 44           | 39.25       |

|    |                                                               |    |       |       |        |     |    |     |       |
|----|---------------------------------------------------------------|----|-------|-------|--------|-----|----|-----|-------|
| 38 | CD4 <sup>+</sup> CD28 <sup>+</sup> cells                      | 25 | 0.294 | 0.109 | 0.209  | 26  | 26 | 85  | 40.75 |
| 39 | CD56 <sup>dim</sup> CD16 <sup>+</sup> NK-cells                | 25 | 0.735 | 0.066 | -0.034 | 13  | 16 | 122 | 41.00 |
| 40 | miR-92a                                                       | 29 | 0.684 | 0.113 | -0.313 | 32  | 29 | 72  | 41.25 |
| 41 | TEMRA CD8 <sup>+</sup> CD28 <sup>+</sup> cells                | 25 | 0.324 | 0.175 | 0.542  | 39  | 41 | 49  | 42.00 |
| 42 | miR-17                                                        | 29 | 0.676 | 0.130 | -0.490 | 40  | 33 | 57  | 42.50 |
| 43 | Class-switched memory B-cells                                 | 25 | 0.676 | 0.175 | -0.405 | 35  | 37 | 66  | 43.25 |
| 44 | EM CD8 <sup>+</sup> CD28 <sup>+</sup> cells                   | 25 | 0.338 | 0.215 | 0.582  | 44  | 49 | 47  | 46.00 |
| 45 | Plasmacytoid dendritic cells                                  | 25 | 0.357 | 0.268 | 0.757  | 53  | 55 | 27  | 47.00 |
| 46 | miR-223                                                       | 29 | 0.658 | 0.176 | -0.513 | 47  | 42 | 52  | 47.00 |
| 47 | miR-126                                                       | 29 | 0.653 | 0.191 | -0.508 | 49  | 44 | 54  | 49.00 |
| 48 | Naive CD4 <sup>+</sup> CD57 <sup>+</sup> cells                | 25 | 0.640 | 0.288 | -0.801 | 58  | 59 | 22  | 49.25 |
| 49 | Hematopoietic stem cells                                      | 25 | 0.357 | 0.262 | 0.636  | 52  | 53 | 40  | 49.25 |
| 50 | miR-424                                                       | 29 | 0.347 | 0.191 | 0.502  | 50  | 45 | 56  | 50.25 |
| 51 | let-7e                                                        | 29 | 0.358 | 0.224 | 0.597  | 55  | 50 | 45  | 51.25 |
| 52 | CM CD4 <sup>+</sup> CD27 <sup>+</sup> CD28 <sup>-</sup> cells | 25 | 0.621 | 0.323 | -0.827 | 64  | 64 | 20  | 53.00 |
| 53 | EM CD4 <sup>+</sup> cells                                     | 25 | 0.662 | 0.215 | -0.247 | 43  | 48 | 80  | 53.50 |
| 54 | Tregs                                                         | 25 | 0.357 | 0.268 | 0.537  | 54  | 56 | 51  | 53.75 |
| 55 | IP-10                                                         | 29 | 0.658 | 0.179 | -0.218 | 46  | 43 | 83  | 54.50 |
| 56 | CD8 <sup>+</sup> cells                                        | 25 | 0.647 | 0.262 | -0.416 | 51  | 54 | 64  | 55.00 |
| 57 | EM CD8 <sup>+</sup> CD27 <sup>+</sup> CD28 <sup>+</sup> cells | 25 | 0.371 | 0.322 | 0.677  | 62  | 63 | 35  | 55.50 |
| 58 | TEMRA CD4 <sup>+</sup> cells                                  | 25 | 0.640 | 0.288 | -0.449 | 56  | 57 | 60  | 57.25 |
| 59 | Naive CD8 <sup>+</sup> cells                                  | 25 | 0.368 | 0.315 | 0.483  | 60  | 61 | 58  | 59.75 |
| 60 | CD3 <sup>+</sup> cells                                        | 25 | 0.654 | 0.238 | -0.147 | 48  | 52 | 91  | 59.75 |
| 61 | miR-18a                                                       | 29 | 0.379 | 0.302 | 0.538  | 65  | 60 | 50  | 60.00 |
| 62 | IL-17A                                                        | 29 | 0.613 | 0.335 | -0.565 | 66  | 65 | 48  | 61.25 |
| 63 | TIM-3                                                         | 29 | 0.611 | 0.353 | -0.630 | 69  | 69 | 42  | 62.25 |
| 64 | B-cells                                                       | 25 | 0.368 | 0.315 | 0.403  | 61  | 62 | 67  | 62.75 |
| 65 | EM CD8 <sup>+</sup> CD27 <sup>+</sup> CD28 <sup>-</sup> cells | 25 | 0.640 | 0.288 | -0.249 | 57  | 58 | 79  | 62.75 |
| 66 | EM CD8 <sup>+</sup> CD27 <sup>+</sup> cells                   | 25 | 0.397 | 0.440 | 0.648  | 73  | 76 | 39  | 65.25 |
| 67 | NK-cells                                                      | 25 | 0.625 | 0.344 | -0.306 | 63  | 66 | 73  | 66.25 |
| 68 | miR-155                                                       | 29 | 0.639 | 0.233 | -0.105 | 59  | 51 | 102 | 67.75 |
| 69 | CM CD8 <sup>+</sup> CD57 <sup>+</sup> cells                   | 25 | 0.426 | 0.580 | 0.791  | 82  | 84 | 24  | 68.00 |
| 70 | CRP                                                           | 29 | 0.389 | 0.353 | 0.292  | 67  | 67 | 74  | 68.75 |
| 71 | CM CD8 <sup>+</sup> CD27 <sup>+</sup> CD28 <sup>-</sup> cells | 25 | 0.434 | 0.620 | 0.776  | 83  | 85 | 25  | 69.00 |
| 72 | EM CD8 <sup>+</sup> cells                                     | 25 | 0.390 | 0.406 | 0.358  | 70  | 70 | 70  | 70.00 |
| 73 | LAG-3                                                         | 29 | 0.611 | 0.353 | -0.285 | 68  | 68 | 76  | 70.00 |
| 74 | CD4/CD8 Ratio                                                 | 25 | 0.390 | 0.406 | 0.286  | 71  | 71 | 75  | 72.00 |
| 75 | IL-17F                                                        | 29 | 0.474 | 0.514 |        | 109 | 80 | 2   | 75.00 |
| 76 | miR-150                                                       | 29 | 0.592 | 0.435 | -0.314 | 78  | 73 | 71  | 75.00 |
| 77 | CD4 <sup>+</sup> CD27 <sup>+</sup> CD28 <sup>+</sup> cells    | 25 | 0.397 | 0.440 | 0.210  | 72  | 75 | 84  | 75.75 |
| 78 | IL-1 $\alpha$                                                 | 29 | 0.592 | 0.435 | -0.284 | 77  | 74 | 77  | 76.25 |
| 79 | CD86                                                          | 29 | 0.595 | 0.429 | -0.239 | 76  | 72 | 81  | 76.25 |
| 80 | 4-1BB                                                         | 29 | 0.542 | 0.566 | -0.474 | 93  | 83 | 59  | 82.00 |
| 81 | Naive Tregs                                                   | 25 | 0.596 | 0.475 | -0.108 | 75  | 78 | 100 | 82.00 |
| 82 | Naive CD8 <sup>+</sup> CD57 <sup>+</sup> cells                | 25 | 0.581 | 0.549 | -0.154 | 80  | 82 | 89  | 82.75 |

|     |                                                                  |    |       |       |        |     |     |     |        |
|-----|------------------------------------------------------------------|----|-------|-------|--------|-----|-----|-----|--------|
| 83  | miR-21                                                           | 29 | 0.576 | 0.520 | -0.140 | 81  | 81  | 92  | 83.75  |
| 84  | PD-1                                                             | 29 | 0.524 | 0.854 | 1.433  | 110 | 110 | 7   | 84.25  |
| 85  | miR-181a                                                         | 29 | 0.582 | 0.491 | 0.095  | 79  | 79  | 108 | 86.25  |
| 86  | Non-classical monocytes                                          | 25 | 0.559 | 0.669 | -0.181 | 85  | 89  | 87  | 86.50  |
| 87  | EM CD8 <sup>+</sup> CD57 <sup>+</sup> cells                      | 25 | 0.603 | 0.440 | -0.009 | 74  | 77  | 126 | 87.75  |
| 88  | CD4 <sup>+</sup> cells                                           | 25 | 0.434 | 0.628 | 0.107  | 84  | 86  | 101 | 88.75  |
| 89  | CTLA-4                                                           | 29 | 0.492 | 0.931 | 2.020  | 122 | 121 | 3   | 92.00  |
| 90  | miR-19a                                                          | 29 | 0.458 | 0.731 | 0.147  | 94  | 92  | 90  | 92.50  |
| 91  | CM CD4 <sup>+</sup> CD57 <sup>+</sup> cells                      | 25 | 0.551 | 0.705 | -0.098 | 88  | 90  | 107 | 93.25  |
| 92  | MCP-1                                                            | 29 | 0.447 | 0.663 | 0.072  | 87  | 88  | 113 | 93.75  |
| 93  | sCD27                                                            | 29 | 0.558 | 0.636 | 0.060  | 86  | 87  | 116 | 93.75  |
| 94  | IGF-1                                                            | 29 | 0.542 | 0.735 | -0.113 | 92  | 93  | 99  | 94.00  |
| 95  | Naive CD4 <sup>+</sup> CD27 <sup>-</sup> CD28 <sup>-</sup> cells | 25 | 0.507 | 0.977 | -1.714 | 125 | 123 | 5   | 94.50  |
| 96  | IL-1 $\beta$                                                     | 29 | 0.545 | 0.713 | 0.092  | 89  | 91  | 109 | 94.50  |
| 97  | IL12p70                                                          | 29 | 0.532 | 0.801 | 0.401  | 104 | 104 | 68  | 95.00  |
| 98  | EM CD4 <sup>+</sup> CD27 <sup>+</sup> cells                      | 25 | 0.544 | 0.754 | -0.101 | 90  | 96  | 104 | 95.00  |
| 99  | CD4 <sup>+</sup> CD27 <sup>+</sup> cells                         | 25 | 0.463 | 0.798 | 0.126  | 98  | 99  | 96  | 97.75  |
| 100 | TNF- $\alpha$                                                    | 29 | 0.539 | 0.747 | 0.099  | 96  | 94  | 105 | 97.75  |
| 101 | TEMRA CD4 <sup>+</sup> CD27 <sup>+</sup> CD28 <sup>+</sup> cells | 25 | 0.537 | 0.798 | -0.130 | 100 | 101 | 93  | 98.50  |
| 102 | let-7i                                                           | 29 | 0.524 | 0.854 | -0.405 | 111 | 111 | 65  | 99.50  |
| 103 | Naive CD4 <sup>+</sup> CD27 <sup>+</sup> cells                   | 25 | 0.544 | 0.754 | -0.037 | 91  | 97  | 121 | 100.00 |
| 104 | EM CD4 <sup>+</sup> CD27 <sup>+</sup> CD28 <sup>+</sup> cells    | 25 | 0.537 | 0.798 | -0.103 | 99  | 100 | 103 | 100.25 |
| 105 | Non-switched memory B-cells                                      | 25 | 0.529 | 0.842 | 0.228  | 106 | 109 | 82  | 100.75 |
| 106 | PD-L2                                                            | 29 | 0.463 | 0.769 | 0.083  | 97  | 98  | 111 | 100.75 |
| 107 | Naive B-cells                                                    | 25 | 0.463 | 0.798 | 0.117  | 102 | 103 | 97  | 101.00 |
| 108 | TEMRA CD4 <sup>+</sup> CD27 <sup>+</sup> cells                   | 25 | 0.533 | 0.816 | -0.127 | 103 | 105 | 94  | 101.25 |
| 109 | IL-8                                                             | 29 | 0.461 | 0.748 | 0.010  | 95  | 95  | 124 | 102.25 |
| 110 | IL-10                                                            | 29 | 0.518 | 0.890 | 0.425  | 116 | 116 | 63  | 102.75 |
| 111 | TEMRA CD4 <sup>+</sup> CD28 <sup>+</sup> cells                   | 25 | 0.478 | 0.887 | 0.256  | 114 | 114 | 78  | 105.00 |
| 112 | Monocytes                                                        | 25 | 0.537 | 0.798 | 0.041  | 101 | 102 | 120 | 106.00 |
| 113 | Memory Tregs                                                     | 25 | 0.478 | 0.887 | 0.114  | 113 | 113 | 98  | 109.25 |
| 114 | miR-19b                                                          | 29 | 0.471 | 0.818 | -0.067 | 108 | 107 | 114 | 109.25 |
| 115 | miR-326                                                          | 29 | 0.471 | 0.817 | -0.054 | 107 | 106 | 118 | 109.50 |
| 116 | Classical monocytes                                              | 25 | 0.471 | 0.842 | 0.012  | 105 | 108 | 123 | 110.25 |
| 117 | IL-6                                                             | 29 | 0.487 | 0.927 | 0.179  | 121 | 119 | 88  | 112.25 |
| 118 | EM CD4 <sup>+</sup> CD28 <sup>+</sup> cells                      | 25 | 0.522 | 0.887 | -0.058 | 112 | 112 | 117 | 113.25 |
| 119 | PD-L1                                                            | 29 | 0.516 | 0.909 | 0.099  | 118 | 118 | 106 | 115.00 |
| 120 | IL-27                                                            | 29 | 0.505 | 0.982 | 0.196  | 126 | 127 | 86  | 116.25 |
| 121 | Naive CD4 <sup>+</sup> CD27 <sup>+</sup> CD28 <sup>+</sup> cells | 25 | 0.493 | 0.977 | 0.127  | 123 | 124 | 95  | 116.25 |
| 122 | miR-125b                                                         | 29 | 0.484 | 0.909 | 0.046  | 117 | 117 | 119 | 117.50 |
| 123 | Naive CD4 <sup>+</sup> cells                                     | 25 | 0.522 | 0.887 | 0.010  | 115 | 115 | 125 | 117.50 |
| 124 | Naive CD4 <sup>+</sup> CD28 <sup>+</sup> cells                   | 25 | 0.485 | 0.932 | 0.079  | 119 | 122 | 112 | 118.00 |
| 125 | Intermediate monocytes                                           | 25 | 0.493 | 0.977 | 0.062  | 124 | 125 | 115 | 122.00 |
| 126 | Myeloid dendritic cells                                          | 25 | 0.485 | 0.930 | -0.003 | 120 | 120 | 128 | 122.00 |
| 127 | miR-146a                                                         | 29 | 0.503 | 1.000 | -0.092 | 128 | 128 | 110 | 123.50 |

|     |  |               |  |  |    |  |       |  |       |  |       |  |     |  |     |  |     |  |        |
|-----|--|---------------|--|--|----|--|-------|--|-------|--|-------|--|-----|--|-----|--|-----|--|--------|
| 128 |  | IFN- $\gamma$ |  |  | 29 |  | 0.505 |  | 0.982 |  | 0.006 |  | 127 |  | 126 |  | 127 |  | 126.75 |
|-----|--|---------------|--|--|----|--|-------|--|-------|--|-------|--|-----|--|-----|--|-----|--|--------|
