# Supplementary material for: Blood Immunosenescence Signatures Reflecting Age, Frailty and Tumor Immune Infiltrate in Patients with Early Luminal Breast Cancer
Source: MDPI journal article supplement (doi:10.3390/cancers13092185), 2021-05-02
Supplement: s1 [file s1]

Table S4: Individual performances of biomarkers correlating with CD8 infiltration in the invasive front (high, intermediate or low infiltration). The table reports the number of patients (N) for which the biomarkers could be measured. The area under the curve (AUC) via receiver operating characteristics (ROC), P-value (Wilcox rank-sum test) and log fold change (FC) are reported for each biomarker. The log FC compared case vs. control. A positive log FC indicates that the measurement is higher than its reference while a negative measurement indicates that is smaller. Based on these statistics AUC, P-value, log FC scores were computed. The final score combines the 3 scores, where AUC weighted double. The biomarkers are ranked based on their final score.

|                              | Blood markers                                                    | N  | AUC   | P-value | log FC | AUC score | P-value score | log FC score | Final score |
|------------------------------|------------------------------------------------------------------|----|-------|---------|--------|-----------|---------------|--------------|-------------|
| <b>HIGH CD8 INFILTRATION</b> |                                                                  |    |       |         |        |           |               |              |             |
| 1                            | TEMRA CD8 <sup>+</sup> CD27 <sup>+</sup> CD28 <sup>+</sup> cells | 54 | 0.268 | 0.009   | 0.646  | 4         | 6             | 45           | 14.75       |
| 2                            | TEMRA CD4 <sup>+</sup> CD27 <sup>+</sup> cells                   | 54 | 0.306 | 0.029   | 0.767  | 16        | 19            | 37           | 22          |
| 3                            | TEMRA CD8 <sup>+</sup> CD27 <sup>+</sup> cells                   | 54 | 0.281 | 0.014   | 0.565  | 10        | 12            | 56           | 22          |
| 4                            | miR-195                                                          | 62 | 0.319 | 0.033   | 1.000  | 22        | 22            | 23           | 22.25       |
| 5                            | TEMRA CD4 <sup>+</sup> CD27 <sup>+</sup> CD28 <sup>+</sup> cells | 54 | 0.315 | 0.037   | 0.771  | 18        | 24            | 36           | 24          |
| 6                            | IL-1 $\alpha$                                                    | 62 | 0.723 | 0.009   | -0.455 | 9         | 5             | 81           | 26          |
| 7                            | Tumor grade                                                      | 62 | 0.200 | 0.000   | 0.357  | 1         | 1             | 118          | 30.25       |
| 8                            | Gal-9                                                            | 62 | 0.652 | 0.073   | -0.658 | 33        | 36            | 42           | 36          |
| 9                            | Age                                                              | 62 | 0.728 | 0.007   | -0.296 | 6         | 4             | 141          | 39.25       |
| 10                           | TIM-3                                                            | 62 | 0.648 | 0.081   | -0.537 | 36        | 40            | 59           | 42.75       |
| 11                           | TEMRA CD4 <sup>+</sup> CD28 <sup>+</sup> cells                   | 54 | 0.356 | 0.105   | 0.776  | 41        | 55            | 35           | 43          |
| 12                           | miR-150                                                          | 62 | 0.358 | 0.094   | 0.610  | 45        | 48            | 51           | 47.25       |
| 13                           | miR-424                                                          | 62 | 0.643 | 0.093   | -0.474 | 44        | 46            | 75           | 52.25       |
| 14                           | miR-125b                                                         | 62 | 0.369 | 0.122   | 0.357  | 60        | 67            | 119          | 76.5        |
| 15                           | sCD25                                                            | 62 | 0.626 | 0.138   | -0.381 | 71        | 70            | 107          | 79.75       |
| 16                           | B-cells                                                          | 54 | 0.634 | 0.133   | -0.276 | 57        | 69            | 156          | 84.75       |
| 17                           | 4-1BB                                                            | 62 | 0.417 | 0.241   | 2.115  | 142       | 107           | 5            | 99          |
| 18                           | EM CD4 <sup>+</sup> CD27 <sup>+</sup> CD28 <sup>+</sup> cells    | 54 | 0.391 | 0.220   | 0.375  | 93        | 101           | 112          | 99.75       |
| 19                           | Class-switched memory B-cells                                    | 54 | 0.384 | 0.192   | 0.257  | 86        | 91            | 163          | 106.5       |
| 20                           | IFN- $\gamma$                                                    | 62 | 0.591 | 0.284   | -0.486 | 125       | 126           | 67           | 110.75      |
| 21                           | Monocytes                                                        | 54 | 0.374 | 0.160   | 0.164  | 72        | 82            | 236          | 115.5       |
| 22                           | IP-10                                                            | 62 | 0.607 | 0.210   | -0.243 | 96        | 98            | 173          | 115.75      |
| 23                           | CD86                                                             | 62 | 0.598 | 0.253   | -0.324 | 109       | 112           | 134          | 116         |
| 24                           | TEMRA CD8 <sup>+</sup> CD28 <sup>+</sup> cells                   | 54 | 0.396 | 0.243   | 0.252  | 99        | 109           | 167          | 118.5       |
| 25                           | TEMRA CD4 <sup>+</sup> cells                                     | 54 | 0.402 | 0.274   | 0.258  | 107       | 119           | 161          | 123.5       |
| 26                           | miR-20a                                                          | 62 | 0.400 | 0.240   | 0.232  | 103       | 106           | 182          | 123.5       |
| 27                           | IL-6                                                             | 62 | 0.586 | 0.315   | -0.460 | 136       | 143           | 80           | 123.75      |
| 28                           | Intermediate monocytes                                           | 54 | 0.619 | 0.185   | -0.160 | 84        | 89            | 240          | 124.25      |
| 29                           | EM CD4 <sup>+</sup> CD27 <sup>+</sup> CD28 <sup>+</sup> cells    | 54 | 0.403 | 0.283   | 0.243  | 112       | 124           | 172          | 130         |
| 30                           | TEMRA CD4 <sup>+</sup> CD27 <sup>+</sup> CD28 <sup>+</sup> cells | 54 | 0.417 | 0.354   | -0.426 | 141       | 160           | 95           | 134.25      |
| 31                           | miR-223                                                          | 62 | 0.412 | 0.299   | 0.282  | 130       | 133           | 153          | 136.5       |
| 32                           | EM CD4 <sup>+</sup> CD27 <sup>+</sup> cells                      | 54 | 0.409 | 0.310   | 0.240  | 123       | 140           | 177          | 140.75      |
| 33                           | TNF- $\alpha$                                                    | 62 | 0.573 | 0.393   | -0.652 | 172       | 179           | 44           | 141.75      |
| 34                           | IL-27                                                            | 62 | 0.579 | 0.355   | -0.355 | 153       | 161           | 121          | 147         |
| 35                           | miR-326                                                          | 62 | 0.579 | 0.275   | -0.257 | 152       | 122           | 164          | 147.5       |
| 36                           | Naive Tregs                                                      | 54 | 0.602 | 0.258   | -0.085 | 102       | 116           | 304          | 156         |
| 37                           | Naive B-cells                                                    | 54 | 0.590 | 0.319   | -0.165 | 127       | 144           | 235          | 158.25      |

|    |                                                                  |    |       |       |        |     |     |     |        |
|----|------------------------------------------------------------------|----|-------|-------|--------|-----|-----|-----|--------|
| 38 | IL12p70                                                          | 62 | 0.565 | 0.449 | -0.606 | 197 | 211 | 52  | 164.25 |
| 39 | CD8 <sup>+</sup> cells                                           | 54 | 0.412 | 0.328 | 0.156  | 133 | 148 | 245 | 164.75 |
| 40 | TEMRA CD4 <sup>+</sup> CD57 <sup>+</sup> cells                   | 54 | 0.433 | 0.457 | -0.474 | 188 | 216 | 74  | 166.5  |
| 41 | TEMRA CD8 <sup>+</sup> cells                                     | 54 | 0.414 | 0.334 | 0.154  | 135 | 152 | 246 | 167    |
| 42 | CM CD8 <sup>+</sup> cells                                        | 54 | 0.568 | 0.451 | -0.371 | 181 | 213 | 114 | 172.25 |
| 43 | Naive CD4 <sup>+</sup> CD27 <sup>-</sup> CD28 <sup>-</sup> cells | 54 | 0.394 | 0.235 | -0.001 | 97  | 105 | 401 | 175    |
| 44 | MCP-1                                                            | 62 | 0.583 | 0.330 | -0.128 | 143 | 149 | 267 | 175.5  |
| 45 | CM CD4 <sup>+</sup> CD28 <sup>+</sup> cells                      | 54 | 0.573 | 0.421 | -0.226 | 173 | 195 | 184 | 181.25 |
| 46 | Memory Tregs                                                     | 54 | 0.421 | 0.378 | 0.141  | 151 | 169 | 256 | 181.75 |
| 47 | CM CD4 <sup>+</sup> cells                                        | 54 | 0.569 | 0.444 | -0.227 | 176 | 205 | 183 | 185    |
| 48 | Naive CD4 <sup>+</sup> CD27 <sup>+</sup> cells                   | 54 | 0.571 | 0.433 | -0.197 | 175 | 199 | 208 | 189.25 |
| 49 | miR-19a                                                          | 62 | 0.426 | 0.385 | 0.154  | 169 | 173 | 247 | 189.5  |
| 50 | miR-126                                                          | 62 | 0.437 | 0.459 | 0.349  | 207 | 217 | 128 | 189.75 |
| 51 | Naive CD4 <sup>+</sup> CD28 <sup>+</sup> cells                   | 54 | 0.569 | 0.440 | -0.192 | 177 | 201 | 214 | 192.25 |
| 52 | miR-9                                                            | 62 | 0.453 | 0.522 | 1.358  | 262 | 241 | 17  | 195.5  |
| 53 | CM CD4 <sup>+</sup> CD27 <sup>-</sup> CD28 <sup>-</sup> cells    | 54 | 0.439 | 0.481 | -0.296 | 218 | 227 | 142 | 201.25 |
| 54 | CD4 <sup>+</sup> CD28 <sup>+</sup> cells                         | 54 | 0.588 | 0.325 | 0.001  | 132 | 145 | 402 | 202.75 |
| 55 | miR-92a                                                          | 62 | 0.438 | 0.469 | 0.240  | 214 | 221 | 175 | 206    |
| 56 | EM CD4 <sup>+</sup> cells                                        | 54 | 0.436 | 0.475 | 0.198  | 199 | 223 | 203 | 206    |
| 57 | CM CD8 <sup>+</sup> CD28 <sup>+</sup> cells                      | 54 | 0.556 | 0.530 | -0.354 | 228 | 247 | 123 | 206.5  |
| 58 | Naive CD4 <sup>+</sup> CD27 <sup>+</sup> CD28 <sup>+</sup> cells | 54 | 0.564 | 0.479 | -0.198 | 201 | 226 | 207 | 208.75 |
| 59 | CD4 <sup>+</sup> CD27 <sup>-</sup> CD28 <sup>-</sup> cells       | 54 | 0.422 | 0.385 | -0.042 | 156 | 171 | 354 | 209.25 |
| 60 | IL-17F                                                           | 62 | 0.469 | 0.443 | 1.502  | 314 | 203 | 14  | 211.25 |
| 61 | IL-17A                                                           | 62 | 0.460 | 0.641 | 2.086  | 280 | 285 | 6   | 212.75 |
| 62 | Naive CD4 <sup>+</sup> cells                                     | 54 | 0.564 | 0.479 | -0.174 | 200 | 225 | 227 | 213    |
| 63 | NK-like T-cells                                                  | 54 | 0.450 | 0.582 | 0.462  | 253 | 269 | 78  | 213.25 |
| 64 | PD-1                                                             | 62 | 0.457 | 0.612 | -0.844 | 274 | 278 | 30  | 214    |
| 65 | Classical monocytes                                              | 54 | 0.422 | 0.389 | 0.018  | 157 | 174 | 382 | 217.5  |
| 66 | Free active TGF-β1                                               | 62 | 0.522 | 0.415 |        | 340 | 192 | 2   | 218.5  |
| 67 | CM CD8 <sup>+</sup> CD27 <sup>+</sup> CD28 <sup>+</sup> cells    | 54 | 0.550 | 0.579 | -0.358 | 247 | 268 | 117 | 219.75 |
| 68 | CM CD4 <sup>+</sup> CD27 <sup>+</sup> cells                      | 54 | 0.557 | 0.528 | -0.198 | 223 | 243 | 205 | 223.5  |
| 69 | miR-17                                                           | 62 | 0.443 | 0.504 | 0.181  | 226 | 232 | 223 | 226.75 |
| 70 | EM CD4 <sup>+</sup> CD57 <sup>+</sup> cells                      | 54 | 0.454 | 0.609 | 0.404  | 266 | 276 | 101 | 227.25 |
| 71 | IL-8                                                             | 62 | 0.565 | 0.449 | -0.075 | 198 | 212 | 315 | 230.75 |
| 72 | CM CD8 <sup>+</sup> CD27 <sup>+</sup> cells                      | 54 | 0.545 | 0.616 | -0.376 | 269 | 280 | 111 | 232.25 |
| 73 | EM CD4 <sup>+</sup> CD28 <sup>+</sup> cells                      | 54 | 0.443 | 0.528 | 0.163  | 224 | 244 | 238 | 232.5  |
| 74 | CM CD4 <sup>+</sup> CD27 <sup>+</sup> CD28 <sup>+</sup> cells    | 54 | 0.554 | 0.549 | -0.196 | 234 | 257 | 212 | 234.25 |
| 75 | Naive CD8 <sup>+</sup> CD57 <sup>+</sup> cells                   | 54 | 0.438 | 0.487 | -0.085 | 211 | 229 | 303 | 238.5  |
| 76 | TEMRA CD8 <sup>+</sup> CD57 <sup>+</sup> cells                   | 54 | 0.443 | 0.528 | 0.137  | 225 | 245 | 260 | 238.75 |
| 77 | Tregs                                                            | 54 | 0.559 | 0.511 | -0.111 | 220 | 235 | 280 | 238.75 |
| 78 | CD56 <sup>dim</sup> CD16 <sup>+</sup> NK-cells                   | 54 | 0.434 | 0.467 | 0.038  | 191 | 220 | 360 | 240.5  |
| 79 | miR-146a                                                         | 62 | 0.437 | 0.459 | 0.047  | 208 | 218 | 348 | 245.5  |
| 80 | Myeloid dendritic cells                                          | 54 | 0.449 | 0.569 | 0.143  | 246 | 265 | 253 | 252.5  |
| 81 | CD3 <sup>+</sup> cells                                           | 54 | 0.440 | 0.505 | 0.053  | 219 | 233 | 343 | 253.5  |
| 82 | EM CD8 <sup>+</sup> CD27 <sup>-</sup> CD28 <sup>-</sup> cells    | 54 | 0.436 | 0.475 | -0.007 | 202 | 224 | 395 | 255.75 |

|     |                                                                  |    |       |       |        |     |     |     |        |
|-----|------------------------------------------------------------------|----|-------|-------|--------|-----|-----|-----|--------|
| 83  | Hematopoietic stem cells                                         | 54 | 0.533 | 0.713 | -0.319 | 301 | 311 | 136 | 262.25 |
| 84  | miR-181a                                                         | 62 | 0.453 | 0.584 | 0.139  | 261 | 270 | 259 | 262.75 |
| 85  | miR-155                                                          | 62 | 0.466 | 0.693 | 0.273  | 295 | 304 | 158 | 263    |
| 86  | IL-1 $\beta$                                                     | 62 | 0.529 | 0.741 | -0.439 | 324 | 326 | 88  | 265.5  |
| 87  | CRP                                                              | 62 | 0.546 | 0.593 | -0.128 | 264 | 274 | 268 | 267.5  |
| 88  | Tumor size                                                       | 62 | 0.541 | 0.626 | -0.147 | 279 | 283 | 249 | 272.5  |
| 89  | PD-L2                                                            | 62 | 0.546 | 0.593 | -0.102 | 265 | 275 | 285 | 272.5  |
| 90  | Non-classical monocytes                                          | 54 | 0.552 | 0.566 | -0.015 | 239 | 263 | 387 | 282    |
| 91  | EM CD8 <sup>+</sup> CD57 <sup>+</sup> cells                      | 54 | 0.451 | 0.592 | 0.046  | 255 | 273 | 349 | 283    |
| 92  | TEMRA CD8 <sup>+</sup> CD27 <sup>-</sup> CD28 <sup>-</sup> cells | 54 | 0.461 | 0.664 | 0.096  | 281 | 294 | 292 | 287    |
| 93  | CD4 <sup>+</sup> CD57 <sup>+</sup> cells                         | 54 | 0.451 | 0.592 | -0.028 | 254 | 272 | 371 | 287.75 |
| 94  | sCD27                                                            | 62 | 0.457 | 0.616 | -0.065 | 275 | 281 | 328 | 289.75 |
| 95  | CD8 <sup>+</sup> CD57 <sup>+</sup> cells                         | 54 | 0.462 | 0.674 | 0.088  | 282 | 299 | 300 | 290.75 |
| 96  | miR-21                                                           | 62 | 0.537 | 0.670 | 0.089  | 287 | 298 | 298 | 292.5  |
| 97  | CD4 <sup>+</sup> Tregs                                           | 54 | 0.545 | 0.616 | 0.029  | 271 | 279 | 368 | 297.25 |
| 98  | IL-10                                                            | 62 | 0.520 | 0.815 | -0.276 | 346 | 347 | 155 | 298.5  |
| 99  | IGF-1                                                            | 62 | 0.462 | 0.661 | 0.061  | 283 | 292 | 336 | 298.5  |
| 100 | CD4 <sup>+</sup> CD27 <sup>+</sup> cells                         | 54 | 0.542 | 0.643 | -0.034 | 277 | 286 | 362 | 300.5  |
| 101 | CM CD8 <sup>+</sup> CD27 <sup>-</sup> CD28 <sup>-</sup> cells    | 54 | 0.511 | 0.908 | -0.476 | 377 | 378 | 72  | 301    |
| 102 | CD4 <sup>+</sup> CD27 <sup>+</sup> CD28 <sup>+</sup> cells       | 54 | 0.542 | 0.646 | -0.033 | 278 | 288 | 363 | 301.75 |
| 103 | CD4/CD8 ratio                                                    | 54 | 0.526 | 0.779 | -0.183 | 329 | 338 | 218 | 303.5  |
| 104 | let-7i                                                           | 62 | 0.533 | 0.705 | -0.083 | 304 | 310 | 306 | 306    |
| 105 | CM CD8 <sup>+</sup> CD57 <sup>+</sup> cells                      | 54 | 0.511 | 0.908 | -0.431 | 378 | 379 | 92  | 306.75 |
| 106 | Naive CD8 <sup>+</sup> CD27 <sup>-</sup> CD28 <sup>-</sup> cells | 54 | 0.467 | 0.714 | -0.061 | 300 | 312 | 334 | 311.5  |
| 107 | T-cell <i>P16<sup>INK4a</sup></i>                                | 42 | 0.500 | 1.000 | -0.704 | 402 | 402 | 41  | 311.75 |
| 108 | PD-L1                                                            | 62 | 0.482 | 0.841 | 0.198  | 354 | 354 | 206 | 317    |
| 109 | Plasmacytoid dendritic cells                                     | 54 | 0.479 | 0.817 | -0.163 | 342 | 350 | 237 | 317.75 |
| 110 | miR-19b                                                          | 62 | 0.470 | 0.729 | 0.073  | 317 | 319 | 318 | 317.75 |
| 111 | Naive CD8 <sup>+</sup> cells                                     | 54 | 0.525 | 0.789 | -0.124 | 331 | 340 | 271 | 318.25 |
| 112 | CD8 <sup>+</sup> CD27 <sup>+</sup> CD28 <sup>+</sup> cells       | 54 | 0.472 | 0.760 | 0.065  | 326 | 330 | 327 | 327.25 |
| 113 | Naive CD8 <sup>+</sup> CD27 <sup>+</sup> cells                   | 54 | 0.515 | 0.877 | -0.179 | 364 | 364 | 225 | 329.25 |
| 114 | EM CD8 <sup>+</sup> CD27 <sup>+</sup> CD28 <sup>+</sup> cells    | 54 | 0.482 | 0.847 | -0.127 | 352 | 356 | 269 | 332.25 |
| 115 | Naive CD4 <sup>+</sup> CD57 <sup>+</sup> cells                   | 54 | 0.476 | 0.794 | -0.069 | 333 | 342 | 323 | 332.75 |
| 116 | let-7e                                                           | 62 | 0.514 | 0.879 | -0.144 | 368 | 365 | 251 | 338    |
| 117 | EM CD8 <sup>+</sup> CD27 <sup>+</sup> cells                      | 54 | 0.486 | 0.885 | -0.140 | 366 | 367 | 257 | 339    |
| 118 | CD8 <sup>+</sup> CD28 <sup>+</sup> cells                         | 54 | 0.523 | 0.804 | -0.039 | 336 | 346 | 359 | 344.25 |
| 119 | Naive CD8 <sup>+</sup> CD27 <sup>+</sup> CD28 <sup>+</sup> cells | 54 | 0.509 | 0.924 | -0.168 | 383 | 384 | 232 | 345.5  |
| 120 | Naive CD8 <sup>+</sup> CD28 <sup>+</sup> cells                   | 54 | 0.513 | 0.892 | -0.117 | 370 | 370 | 277 | 346.75 |
| 121 | miR-18a                                                          | 62 | 0.523 | 0.791 | -0.020 | 335 | 341 | 379 | 347.5  |
| 122 | LAG-3                                                            | 62 | 0.503 | 0.981 | -0.208 | 399 | 399 | 197 | 348.5  |
| 123 | CD8 <sup>+</sup> CD27 <sup>-</sup> CD28 <sup>-</sup> cells       | 54 | 0.515 | 0.877 | -0.071 | 363 | 363 | 321 | 352.5  |
| 124 | CD8 <sup>+</sup> CD27 <sup>+</sup> cells                         | 54 | 0.515 | 0.870 | -0.062 | 360 | 361 | 331 | 353    |
| 125 | CTLA-4                                                           | 62 | 0.483 | 0.763 | -0.017 | 355 | 333 | 384 | 356.75 |
| 126 | NK-cells                                                         | 54 | 0.518 | 0.849 | -0.022 | 351 | 357 | 377 | 359    |
| 127 | Non-switched memory B-cells                                      | 54 | 0.485 | 0.879 | -0.043 | 362 | 366 | 353 | 360.75 |

|                               |                                                                  |    |       |       |        |     |     |     |        |
|-------------------------------|------------------------------------------------------------------|----|-------|-------|--------|-----|-----|-----|--------|
| 128                           | Geriatric_G8score                                                | 27 | 0.479 | 0.937 | -0.028 | 345 | 388 | 370 | 362    |
| 129                           | CD56 <sup>bright</sup> CD16 <sup>-</sup> NK-cells                | 54 | 0.512 | 0.900 | -0.063 | 373 | 377 | 330 | 363.25 |
| 130                           | Lymph node involvement                                           | 62 | 0.511 | 0.889 | -0.061 | 379 | 369 | 335 | 365.5  |
| 131                           | CM CD4 <sup>+</sup> CD57 <sup>+</sup> cells                      | 54 | 0.497 | 0.977 | -0.040 | 397 | 398 | 358 | 387.5  |
| 132                           | CD4 <sup>+</sup> cells                                           | 54 | 0.491 | 0.924 | 0.004  | 384 | 385 | 400 | 388.25 |
| 133                           | EM CD8 <sup>+</sup> cells                                        | 54 | 0.504 | 0.970 | -0.027 | 394 | 396 | 372 | 389    |
| 134                           | EM CD8 <sup>+</sup> CD28 <sup>+</sup> cells                      | 54 | 0.494 | 0.954 | -0.016 | 392 | 393 | 386 | 390.75 |
| INTERMEDIATE CD8 INFILTRATION |                                                                  |    |       |       |        |     |     |     |        |
| 1                             | CD4/CD8 ratio                                                    | 54 | 0.678 | 0.026 | -0.626 | 25  | 18  | 50  | 30     |
| 2                             | CD4 <sup>+</sup> cells                                           | 54 | 0.689 | 0.017 | -0.439 | 17  | 15  | 89  | 35     |
| 3                             | TEMRA CD8 <sup>+</sup> CD27 <sup>+</sup> CD28 <sup>+</sup> cells | 54 | 0.682 | 0.023 | -0.451 | 21  | 17  | 83  | 36     |
| 4                             | T-cell <i>P16</i> <sup>INK4a</sup>                               | 42 | 0.356 | 0.113 | 1.373  | 43  | 58  | 16  | 40     |
| 5                             | sCD27                                                            | 62 | 0.674 | 0.018 | -0.382 | 26  | 16  | 106 | 44     |
| 6                             | CM CD8 <sup>+</sup> CD28 <sup>+</sup> cells                      | 54 | 0.638 | 0.085 | -0.591 | 49  | 42  | 53  | 48     |
| 7                             | CM CD8 <sup>+</sup> CD27 <sup>+</sup> CD28 <sup>+</sup> cells    | 54 | 0.636 | 0.090 | -0.572 | 54  | 44  | 55  | 52     |
| 8                             | CM CD8 <sup>+</sup> CD27 <sup>+</sup> cells                      | 54 | 0.638 | 0.086 | -0.537 | 52  | 43  | 60  | 52     |
| 9                             | TEMRA CD8 <sup>+</sup> CD27 <sup>+</sup> cells                   | 54 | 0.651 | 0.059 | -0.379 | 34  | 32  | 108 | 52     |
| 10                            | TEMRA CD4 <sup>+</sup> CD27 <sup>+</sup> cells                   | 54 | 0.628 | 0.109 | -0.643 | 68  | 57  | 46  | 60     |
| 11                            | CM CD8 <sup>+</sup> cells                                        | 54 | 0.631 | 0.104 | -0.538 | 65  | 52  | 58  | 60     |
| 12                            | Memory Tregs                                                     | 54 | 0.661 | 0.044 | -0.271 | 29  | 27  | 159 | 61     |
| 13                            | TEMRA CD4 <sup>+</sup> CD27 <sup>+</sup> CD28 <sup>+</sup> cells | 54 | 0.625 | 0.119 | -0.658 | 74  | 62  | 43  | 63     |
| 14                            | CD86                                                             | 62 | 0.369 | 0.077 | 0.419  | 59  | 38  | 98  | 64     |
| 15                            | Lymph node involvement                                           | 62 | 0.386 | 0.077 | 0.641  | 89  | 39  | 47  | 66     |
| 16                            | Tregs                                                            | 54 | 0.624 | 0.121 | -0.480 | 78  | 65  | 71  | 73     |
| 17                            | MCP-1                                                            | 62 | 0.646 | 0.049 | -0.190 | 38  | 29  | 215 | 80     |
| 18                            | miR-19a                                                          | 62 | 0.626 | 0.091 | -0.301 | 73  | 45  | 138 | 82     |
| 19                            | NK-cells                                                         | 54 | 0.375 | 0.120 | 0.323  | 75  | 63  | 135 | 87     |
| 20                            | miR-150                                                          | 62 | 0.606 | 0.155 | -0.446 | 98  | 80  | 86  | 91     |
| 21                            | PD-L1                                                            | 62 | 0.393 | 0.151 | 0.378  | 95  | 79  | 110 | 95     |
| 22                            | miR-92a                                                          | 62 | 0.615 | 0.121 | -0.291 | 87  | 64  | 146 | 96     |
| 23                            | Naive Tregs                                                      | 54 | 0.353 | 0.066 | 0.119  | 37  | 35  | 275 | 96     |
| 24                            | TEMRA CD4 <sup>+</sup> CD28 <sup>+</sup> cells                   | 54 | 0.592 | 0.257 | -0.497 | 122 | 115 | 64  | 106    |
| 25                            | CRP                                                              | 62 | 0.595 | 0.204 | -0.399 | 115 | 96  | 102 | 107    |
| 26                            | CD3 <sup>+</sup> cells                                           | 54 | 0.627 | 0.113 | -0.140 | 69  | 59  | 258 | 114    |
| 27                            | Tumor grade                                                      | 62 | 0.610 | 0.081 | -0.145 | 92  | 41  | 250 | 119    |
| 28                            | CD8 <sup>+</sup> CD27 <sup>-</sup> CD28 <sup>-</sup> cells       | 54 | 0.406 | 0.242 | 0.287  | 117 | 108 | 149 | 123    |
| 29                            | PD-1                                                             | 62 | 0.427 | 0.327 | 1.588  | 171 | 147 | 10  | 125    |
| 30                            | CD8 <sup>+</sup> CD27 <sup>+</sup> cells                         | 54 | 0.599 | 0.216 | -0.199 | 104 | 100 | 201 | 127    |
| 31                            | Naive CD8 <sup>+</sup> CD27 <sup>-</sup> CD28 <sup>-</sup> cells | 54 | 0.583 | 0.304 | -0.378 | 144 | 137 | 109 | 134    |
| 32                            | CTLA-4                                                           | 62 | 0.561 | 0.202 | -1.576 | 217 | 93  | 11  | 135    |
| 33                            | CD8 <sup>+</sup> CD28 <sup>+</sup> cells                         | 54 | 0.599 | 0.222 | -0.169 | 105 | 103 | 231 | 136    |
| 34                            | CD8 <sup>+</sup> CD27 <sup>+</sup> CD28 <sup>+</sup> cells       | 54 | 0.590 | 0.265 | -0.211 | 129 | 118 | 195 | 143    |
| 35                            | TEMRA CD8 <sup>+</sup> CD27 <sup>-</sup> CD28 <sup>-</sup> cells | 54 | 0.418 | 0.309 | 0.295  | 146 | 139 | 144 | 144    |
| 36                            | Hematopoietic stem cells                                         | 54 | 0.422 | 0.332 | 0.368  | 155 | 151 | 115 | 144    |
| 37                            | Naive CD8 <sup>+</sup> CD57 <sup>+</sup> cells                   | 54 | 0.576 | 0.347 | -0.421 | 162 | 158 | 97  | 145    |

|    |                                                                  |    |       |       |        |     |     |     |     |
|----|------------------------------------------------------------------|----|-------|-------|--------|-----|-----|-----|-----|
| 38 | IFN- $\gamma$                                                    | 62 | 0.424 | 0.306 | 0.330  | 161 | 138 | 131 | 148 |
| 39 | TEMRA CD8 <sup>+</sup> CD57 <sup>+</sup> cells                   | 54 | 0.418 | 0.311 | 0.248  | 147 | 142 | 170 | 152 |
| 40 | IL-17F                                                           | 62 | 0.548 | 0.175 | -7.396 | 259 | 86  | 4   | 152 |
| 41 | TEMRA CD8 <sup>+</sup> CD28 <sup>+</sup> cells                   | 54 | 0.591 | 0.258 | -0.130 | 126 | 117 | 266 | 159 |
| 42 | Age                                                              | 62 | 0.405 | 0.202 | 0.075  | 116 | 94  | 312 | 160 |
| 43 | miR-223                                                          | 62 | 0.577 | 0.304 | -0.221 | 160 | 136 | 189 | 161 |
| 44 | G8 score                                                         | 27 | 0.619 | 0.293 | -0.041 | 83  | 129 | 357 | 163 |
| 45 | 4-1BB                                                            | 62 | 0.553 | 0.392 | -1.316 | 235 | 178 | 18  | 167 |
| 46 | Free active TGF- $\beta$ 1                                       | 62 | 0.467 | 0.147 |        | 298 | 76  | 1   | 168 |
| 47 | miR-326                                                          | 62 | 0.438 | 0.331 | 0.390  | 213 | 150 | 103 | 170 |
| 48 | CM CD8 <sup>+</sup> CD57 <sup>+</sup> cells                      | 54 | 0.594 | 0.243 | -0.062 | 118 | 110 | 333 | 170 |
| 49 | miR-155                                                          | 62 | 0.564 | 0.390 | -0.383 | 204 | 177 | 105 | 173 |
| 50 | CM CD4 <sup>+</sup> CD27 <sup>-</sup> CD28 <sup>-</sup> cells    | 54 | 0.557 | 0.462 | -0.889 | 227 | 219 | 28  | 175 |
| 51 | EM CD8 <sup>+</sup> CD27 <sup>+</sup> CD28 <sup>+</sup> cells    | 54 | 0.585 | 0.292 | -0.087 | 137 | 128 | 302 | 176 |
| 52 | CD8 <sup>+</sup> CD57 <sup>+</sup> cells                         | 54 | 0.425 | 0.355 | 0.184  | 165 | 162 | 217 | 177 |
| 53 | CD8 <sup>+</sup> cells                                           | 54 | 0.425 | 0.355 | 0.182  | 166 | 163 | 219 | 179 |
| 54 | miR-17                                                           | 62 | 0.566 | 0.375 | -0.221 | 190 | 167 | 188 | 184 |
| 55 | miR-9                                                            | 62 | 0.548 | 0.449 | -1.481 | 258 | 209 | 15  | 185 |
| 56 | TEMRA CD4 <sup>+</sup> CD57 <sup>+</sup> cells                   | 54 | 0.448 | 0.519 | 0.812  | 241 | 240 | 33  | 189 |
| 57 | Naive CD4 <sup>+</sup> CD27 <sup>+</sup> cells                   | 54 | 0.432 | 0.402 | 0.193  | 179 | 184 | 213 | 189 |
| 58 | Non-switched memory B-cells                                      | 54 | 0.436 | 0.431 | 0.288  | 206 | 198 | 148 | 190 |
| 59 | let-7e                                                           | 62 | 0.564 | 0.390 | -0.240 | 203 | 176 | 176 | 190 |
| 60 | Gal-9                                                            | 62 | 0.433 | 0.374 | 0.181  | 187 | 166 | 221 | 190 |
| 61 | Naive CD4 <sup>+</sup> CD28 <sup>+</sup> cells                   | 54 | 0.433 | 0.403 | 0.185  | 184 | 187 | 216 | 193 |
| 62 | B-cells                                                          | 54 | 0.436 | 0.431 | 0.198  | 205 | 197 | 204 | 203 |
| 63 | EM CD8 <sup>+</sup> CD27 <sup>+</sup> cells                      | 54 | 0.574 | 0.356 | -0.068 | 168 | 165 | 324 | 206 |
| 64 | CD4 <sup>+</sup> CD57 <sup>+</sup> cells                         | 54 | 0.447 | 0.517 | 0.355  | 238 | 238 | 120 | 209 |
| 65 | EM CD8 <sup>+</sup> CD28 <sup>+</sup> cells                      | 54 | 0.568 | 0.402 | -0.090 | 180 | 185 | 296 | 210 |
| 66 | Naive CD4 <sup>+</sup> cells                                     | 54 | 0.438 | 0.442 | 0.166  | 209 | 202 | 234 | 214 |
| 67 | IL-1 $\alpha$                                                    | 62 | 0.435 | 0.382 | 0.079  | 195 | 170 | 309 | 217 |
| 68 | Naive CD8 <sup>+</sup> CD27 <sup>+</sup> cells                   | 54 | 0.567 | 0.403 | -0.067 | 185 | 188 | 326 | 221 |
| 69 | CM CD4 <sup>+</sup> CD27 <sup>+</sup> CD28 <sup>+</sup> cells    | 54 | 0.554 | 0.503 | -0.217 | 232 | 231 | 192 | 222 |
| 70 | Naive CD8 <sup>+</sup> CD28 <sup>+</sup> cells                   | 54 | 0.565 | 0.418 | -0.075 | 192 | 194 | 314 | 223 |
| 71 | EM CD4 <sup>+</sup> CD27 <sup>+</sup> CD28 <sup>+</sup> cells    | 54 | 0.553 | 0.517 | -0.220 | 237 | 237 | 190 | 225 |
| 72 | Naive CD8 <sup>+</sup> CD27 <sup>+</sup> CD28 <sup>+</sup> cells | 54 | 0.567 | 0.411 | -0.056 | 186 | 191 | 340 | 226 |
| 73 | CM CD4 <sup>+</sup> CD57 <sup>+</sup> cells                      | 54 | 0.547 | 0.560 | -0.350 | 260 | 261 | 126 | 227 |
| 74 | IL-17A                                                           | 62 | 0.467 | 0.657 | -1.045 | 299 | 290 | 22  | 228 |
| 75 | CM CD4 <sup>+</sup> cells                                        | 54 | 0.550 | 0.540 | -0.252 | 248 | 252 | 166 | 229 |
| 76 | TEMRA CD4 <sup>+</sup> CD27 <sup>-</sup> CD28 <sup>-</sup> cells | 54 | 0.466 | 0.676 | 0.830  | 294 | 300 | 31  | 230 |
| 77 | CM CD4 <sup>+</sup> CD27 <sup>+</sup> cells                      | 54 | 0.551 | 0.528 | -0.218 | 243 | 246 | 191 | 231 |
| 78 | LAG-3                                                            | 62 | 0.448 | 0.488 | 0.196  | 242 | 230 | 209 | 231 |
| 79 | Naive CD4 <sup>+</sup> CD27 <sup>+</sup> CD28 <sup>+</sup> cells | 54 | 0.446 | 0.506 | 0.174  | 233 | 234 | 228 | 232 |
| 80 | Plasmacytoid dendritic cells                                     | 54 | 0.450 | 0.536 | 0.240  | 251 | 249 | 178 | 232 |
| 81 | CM CD4 <sup>+</sup> CD28 <sup>+</sup> cells                      | 54 | 0.549 | 0.551 | -0.248 | 256 | 258 | 169 | 235 |
| 82 | EM CD4 <sup>+</sup> CD27 <sup>-</sup> CD28 <sup>-</sup> cells    | 54 | 0.439 | 0.449 | -0.090 | 216 | 210 | 297 | 235 |

|     |                                                                  |    |       |       |        |     |     |     |     |
|-----|------------------------------------------------------------------|----|-------|-------|--------|-----|-----|-----|-----|
| 83  | miR-20a                                                          | 62 | 0.439 | 0.410 | 0.071  | 215 | 189 | 322 | 235 |
| 84  | Naive CD4 <sup>+</sup> CD27 <sup>+</sup> CD28 <sup>-</sup> cells | 54 | 0.565 | 0.423 | 0.041  | 196 | 196 | 356 | 236 |
| 85  | EM CD4 <sup>+</sup> CD57 <sup>+</sup> cells                      | 54 | 0.433 | 0.403 | -0.009 | 183 | 186 | 392 | 236 |
| 86  | Naive CD8 <sup>+</sup> cells                                     | 54 | 0.558 | 0.473 | -0.101 | 222 | 222 | 286 | 238 |
| 87  | CD4 <sup>+</sup> CD27 <sup>+</sup> CD28 <sup>-</sup> cells       | 54 | 0.463 | 0.645 | 0.388  | 285 | 287 | 104 | 240 |
| 88  | EM CD4 <sup>+</sup> CD27 <sup>+</sup> cells                      | 54 | 0.549 | 0.551 | -0.209 | 257 | 259 | 196 | 242 |
| 89  | TEMRA CD8 <sup>+</sup> cells                                     | 54 | 0.449 | 0.525 | 0.152  | 244 | 242 | 248 | 245 |
| 90  | sCD25                                                            | 62 | 0.444 | 0.454 | 0.081  | 229 | 215 | 308 | 245 |
| 91  | CM CD8 <sup>+</sup> CD27 <sup>+</sup> CD28 <sup>-</sup> cells    | 54 | 0.552 | 0.519 | 0.107  | 240 | 239 | 283 | 251 |
| 92  | TEMRA CD4 <sup>+</sup> cells                                     | 54 | 0.550 | 0.540 | 0.136  | 249 | 253 | 261 | 253 |
| 93  | NK-like T-cells                                                  | 54 | 0.450 | 0.537 | 0.131  | 250 | 250 | 265 | 254 |
| 94  | IL-27                                                            | 62 | 0.454 | 0.535 | 0.132  | 263 | 248 | 263 | 259 |
| 95  | Monocytes                                                        | 54 | 0.464 | 0.660 | 0.239  | 289 | 291 | 179 | 262 |
| 96  | miR-146a                                                         | 62 | 0.546 | 0.540 | -0.126 | 268 | 254 | 270 | 265 |
| 97  | Naive B-cells                                                    | 54 | 0.546 | 0.575 | -0.111 | 267 | 267 | 282 | 271 |
| 98  | TNF- $\alpha$                                                    | 62 | 0.467 | 0.662 | 0.214  | 303 | 293 | 193 | 273 |
| 99  | IL-1 $\beta$                                                     | 62 | 0.471 | 0.703 | 0.254  | 322 | 308 | 165 | 279 |
| 100 | EM CD8 <sup>+</sup> CD27 <sup>+</sup> CD28 <sup>-</sup> cells    | 54 | 0.476 | 0.774 | 0.350  | 334 | 335 | 127 | 283 |
| 101 | Myeloid dendritic cells                                          | 54 | 0.532 | 0.695 | -0.182 | 308 | 306 | 220 | 286 |
| 102 | let-7i                                                           | 62 | 0.538 | 0.612 | 0.077  | 284 | 277 | 310 | 289 |
| 103 | miR-181a                                                         | 62 | 0.544 | 0.554 | -0.030 | 273 | 260 | 364 | 293 |
| 104 | CD4 <sup>+</sup> Tregs                                           | 54 | 0.532 | 0.695 | -0.133 | 307 | 305 | 262 | 295 |
| 105 | IL-6                                                             | 62 | 0.542 | 0.573 | -0.028 | 276 | 266 | 369 | 297 |
| 106 | EM CD8 <sup>+</sup> cells                                        | 54 | 0.544 | 0.586 | 0.018  | 272 | 271 | 383 | 300 |
| 107 | miR-424                                                          | 62 | 0.466 | 0.652 | 0.072  | 296 | 289 | 320 | 300 |
| 108 | miR-195                                                          | 62 | 0.477 | 0.762 | -0.199 | 337 | 331 | 202 | 302 |
| 109 | Class-switched memory B-cells                                    | 54 | 0.533 | 0.682 | -0.074 | 297 | 301 | 316 | 303 |
| 110 | miR-19b                                                          | 62 | 0.468 | 0.667 | 0.073  | 306 | 295 | 319 | 307 |
| 111 | CD4 <sup>+</sup> CD28 <sup>+</sup> cells                         | 54 | 0.535 | 0.670 | -0.051 | 293 | 297 | 344 | 307 |
| 112 | miR-126                                                          | 62 | 0.464 | 0.632 | -0.015 | 290 | 284 | 389 | 313 |
| 113 | EM CD4 <sup>+</sup> cells                                        | 54 | 0.528 | 0.728 | -0.088 | 325 | 316 | 301 | 317 |
| 114 | TIM-3                                                            | 62 | 0.490 | 0.894 | -0.283 | 380 | 373 | 152 | 321 |
| 115 | miR-21                                                           | 62 | 0.481 | 0.800 | -0.143 | 349 | 344 | 252 | 324 |
| 116 | IL-8                                                             | 62 | 0.529 | 0.704 | -0.030 | 323 | 309 | 366 | 330 |
| 117 | EM CD8 <sup>+</sup> CD57 <sup>+</sup> cells                      | 54 | 0.514 | 0.870 | 0.172  | 365 | 362 | 230 | 331 |
| 118 | CD4 <sup>+</sup> CD27 <sup>+</sup> CD28 <sup>+</sup> cells       | 54 | 0.526 | 0.749 | -0.055 | 328 | 328 | 341 | 331 |
| 119 | EM CD4 <sup>+</sup> CD28 <sup>+</sup> cells                      | 54 | 0.519 | 0.816 | -0.092 | 348 | 348 | 295 | 335 |
| 120 | miR-125b                                                         | 62 | 0.518 | 0.816 | -0.100 | 353 | 349 | 287 | 336 |
| 121 | Naive CD4 <sup>+</sup> CD57 <sup>+</sup> cells                   | 54 | 0.478 | 0.787 | 0.044  | 338 | 339 | 351 | 342 |
| 122 | IGF-1                                                            | 62 | 0.522 | 0.774 | -0.030 | 339 | 336 | 367 | 345 |
| 123 | CD56 <sup>dim</sup> CD16 <sup>+</sup> NK-cells                   | 54 | 0.525 | 0.763 | -0.012 | 330 | 332 | 391 | 346 |
| 124 | miR-18a                                                          | 62 | 0.476 | 0.746 | 0.009  | 332 | 327 | 393 | 346 |
| 125 | CD4 <sup>+</sup> CD27 <sup>+</sup> cells                         | 54 | 0.521 | 0.801 | -0.041 | 344 | 345 | 355 | 347 |
| 126 | IL12p70                                                          | 62 | 0.479 | 0.778 | 0.030  | 343 | 337 | 365 | 347 |
| 127 | IP-10                                                            | 62 | 0.480 | 0.794 | 0.020  | 347 | 343 | 378 | 354 |

|                      |                                                                  |    |       |       |        |     |     |     |       |
|----------------------|------------------------------------------------------------------|----|-------|-------|--------|-----|-----|-----|-------|
| 128                  | Intermediate monocytes                                           | 54 | 0.508 | 0.924 | -0.119 | 387 | 386 | 276 | 359   |
| 129                  | Classical monocytes                                              | 54 | 0.483 | 0.843 | 0.025  | 356 | 355 | 373 | 360   |
| 130                  | Non-classical monocytes                                          | 54 | 0.494 | 0.952 | -0.123 | 393 | 392 | 274 | 363   |
| 131                  | PD-L2                                                            | 62 | 0.516 | 0.839 | 0.004  | 358 | 353 | 399 | 367   |
| 132                  | CD56 <sup>bright</sup> CD16 <sup>-</sup> NK-cells                | 54 | 0.485 | 0.855 | -0.006 | 361 | 359 | 397 | 370   |
| 133                  | IL-10                                                            | 62 | 0.496 | 0.966 | -0.083 | 396 | 394 | 307 | 373   |
| 134                  | Tumor size                                                       | 62 | 0.491 | 0.909 | -0.045 | 385 | 380 | 350 | 375   |
| LOW CD8 INFILTRATION |                                                                  |    |       |       |        |     |     |     |       |
| 1                    | CD4/CD8 ratio                                                    | 54 | 0.255 | 0.006 | 0.827  | 3   | 3   | 32  | 10.25 |
| 2                    | CM CD8 <sup>+</sup> CD28 <sup>+</sup> cells                      | 54 | 0.274 | 0.011 | 0.924  | 7   | 8   | 24  | 11.5  |
| 3                    | CM CD8 <sup>+</sup> cells                                        | 54 | 0.272 | 0.010 | 0.887  | 5   | 7   | 29  | 11.5  |
| 4                    | CM CD8 <sup>+</sup> CD27 <sup>+</sup> CD28 <sup>+</sup> cells    | 54 | 0.282 | 0.013 | 0.909  | 11  | 11  | 26  | 14.75 |
| 5                    | miR-195                                                          | 62 | 0.711 | 0.013 | -1.093 | 15  | 10  | 21  | 15.25 |
| 6                    | CM CD8 <sup>+</sup> CD27 <sup>+</sup> cells                      | 54 | 0.285 | 0.016 | 0.889  | 12  | 13  | 27  | 16    |
| 7                    | T-cell <i>P16</i> <sup>INK4a</sup>                               | 42 | 0.714 | 0.053 | -1.623 | 13  | 30  | 9   | 16.25 |
| 8                    | Tregs                                                            | 54 | 0.288 | 0.017 | 0.629  | 14  | 14  | 49  | 22.75 |
| 9                    | CD4 <sup>+</sup> cells                                           | 54 | 0.277 | 0.011 | 0.489  | 8   | 9   | 66  | 22.75 |
| 10                   | sCD27                                                            | 62 | 0.317 | 0.029 | 0.515  | 20  | 20  | 61  | 30.25 |
| 11                   | PD-L1                                                            | 62 | 0.657 | 0.064 | -0.808 | 31  | 34  | 34  | 32.5  |
| 12                   | MCP-1                                                            | 62 | 0.226 | 0.001 | 0.352  | 2   | 2   | 124 | 32.5  |
| 13                   | CRP                                                              | 62 | 0.330 | 0.044 | 0.586  | 28  | 28  | 54  | 34.5  |
| 14                   | Monocytes                                                        | 54 | 0.670 | 0.055 | -0.506 | 27  | 31  | 62  | 36.75 |
| 15                   | PD-1                                                             | 62 | 0.639 | 0.102 | -1.653 | 48  | 51  | 8   | 38.75 |
| 16                   | Lymph node involvement                                           | 62 | 0.637 | 0.062 | -0.909 | 53  | 33  | 25  | 41    |
| 17                   | TEMRA CD8 <sup>+</sup> CD57 <sup>+</sup> cells                   | 54 | 0.658 | 0.075 | -0.485 | 30  | 37  | 69  | 41.5  |
| 18                   | CD8 <sup>+</sup> cells                                           | 54 | 0.680 | 0.042 | -0.412 | 23  | 26  | 99  | 42.75 |
| 19                   | miR-20a                                                          | 62 | 0.680 | 0.034 | -0.355 | 24  | 23  | 122 | 48.25 |
| 20                   | EM CD4 <sup>+</sup> CD27 <sup>-</sup> CD28 <sup>-</sup> cells    | 54 | 0.685 | 0.038 | -0.299 | 19  | 25  | 140 | 50.75 |
| 21                   | TIM-3                                                            | 62 | 0.365 | 0.114 | 0.765  | 56  | 60  | 38  | 52.5  |
| 22                   | CD8 <sup>+</sup> CD27 <sup>-</sup> CD28 <sup>-</sup> cells       | 54 | 0.644 | 0.105 | -0.455 | 40  | 54  | 82  | 54    |
| 23                   | TEMRA CD8 <sup>+</sup> CD27 <sup>-</sup> CD28 <sup>-</sup> cells | 54 | 0.640 | 0.115 | -0.503 | 47  | 61  | 63  | 54.5  |
| 24                   | IL-6                                                             | 62 | 0.359 | 0.097 | 0.431  | 46  | 49  | 91  | 58    |
| 25                   | TEMRA CD8 <sup>+</sup> cells                                     | 54 | 0.650 | 0.093 | -0.368 | 35  | 47  | 116 | 58.25 |
| 26                   | TEMRA CD4 <sup>+</sup> CD57 <sup>+</sup> cells                   | 54 | 0.631 | 0.142 | -0.630 | 63  | 72  | 48  | 61.5  |
| 27                   | CM CD4 <sup>+</sup> CD28 <sup>+</sup> cells                      | 54 | 0.368 | 0.138 | 0.486  | 58  | 71  | 68  | 63.75 |
| 28                   | CM CD4 <sup>+</sup> cells                                        | 54 | 0.369 | 0.143 | 0.491  | 62  | 74  | 65  | 65.75 |
| 29                   | TEMRA CD4 <sup>+</sup> CD27 <sup>-</sup> CD28 <sup>-</sup> cells | 54 | 0.625 | 0.161 | -0.711 | 76  | 83  | 40  | 68.75 |
| 30                   | NK-cells                                                         | 54 | 0.636 | 0.128 | -0.405 | 55  | 68  | 100 | 69.5  |
| 31                   | Naive B-cells                                                    | 54 | 0.354 | 0.101 | 0.284  | 39  | 50  | 151 | 69.75 |
| 32                   | IL-1 $\alpha$                                                    | 62 | 0.362 | 0.104 | 0.301  | 50  | 53  | 139 | 73    |
| 33                   | EM CD4 <sup>+</sup> CD57 <sup>+</sup> cells                      | 54 | 0.629 | 0.147 | -0.449 | 66  | 77  | 84  | 73.25 |
| 34                   | Tumor grade                                                      | 62 | 0.656 | 0.030 | -0.196 | 32  | 21  | 210 | 73.75 |
| 35                   | CM CD8 <sup>+</sup> CD57 <sup>+</sup> cells                      | 54 | 0.374 | 0.156 | 0.448  | 70  | 81  | 85  | 76.5  |
| 36                   | CD8 <sup>+</sup> CD27 <sup>+</sup> cells                         | 54 | 0.362 | 0.122 | 0.292  | 51  | 66  | 145 | 78.25 |
| 37                   | CD4 <sup>+</sup> CD27 <sup>-</sup> CD28 <sup>-</sup> cells       | 54 | 0.624 | 0.164 | -0.476 | 79  | 85  | 73  | 79    |

|    |                                                                  |    |       |       |        |     |     |     |        |
|----|------------------------------------------------------------------|----|-------|-------|--------|-----|-----|-----|--------|
| 38 | NK-like T-cells                                                  | 54 | 0.611 | 0.213 | -0.744 | 90  | 99  | 39  | 79.5   |
| 39 | CD8 <sup>+</sup> CD28 <sup>+</sup> cells                         | 54 | 0.356 | 0.105 | 0.236  | 42  | 56  | 181 | 80.25  |
| 40 | CD8 <sup>+</sup> CD57 <sup>+</sup> cells                         | 54 | 0.631 | 0.143 | -0.336 | 64  | 75  | 129 | 83     |
| 41 | CM CD4 <sup>+</sup> CD27 <sup>+</sup> cells                      | 54 | 0.379 | 0.178 | 0.430  | 81  | 88  | 93  | 85.75  |
| 42 | CM CD4 <sup>+</sup> CD27 <sup>+</sup> CD28 <sup>+</sup> cells    | 54 | 0.379 | 0.176 | 0.428  | 82  | 87  | 94  | 86.25  |
| 43 | Intermediate monocytes                                           | 54 | 0.371 | 0.149 | 0.289  | 67  | 78  | 147 | 89.75  |
| 44 | CD4 <sup>+</sup> CD57 <sup>+</sup> cells                         | 54 | 0.614 | 0.205 | -0.445 | 88  | 97  | 87  | 90     |
| 45 | CD8 <sup>+</sup> CD27 <sup>+</sup> CD28 <sup>+</sup> cells       | 54 | 0.375 | 0.161 | 0.313  | 77  | 84  | 137 | 93.75  |
| 46 | miR-126                                                          | 62 | 0.610 | 0.195 | -0.373 | 91  | 92  | 113 | 96.75  |
| 47 | IL-17A                                                           | 62 | 0.584 | 0.326 | -1.793 | 139 | 146 | 7   | 107.75 |
| 48 | let-7e                                                           | 62 | 0.403 | 0.253 | 0.423  | 111 | 114 | 96  | 108    |
| 49 | miR-125b                                                         | 62 | 0.608 | 0.204 | -0.258 | 94  | 95  | 162 | 111.25 |
| 50 | EM CD8 <sup>+</sup> CD27 <sup>+</sup> CD28 <sup>-</sup> cells    | 54 | 0.593 | 0.297 | -0.462 | 119 | 130 | 79  | 111.75 |
| 51 | miR-424                                                          | 62 | 0.401 | 0.247 | 0.324  | 106 | 111 | 133 | 114    |
| 52 | Memory Tregs                                                     | 54 | 0.381 | 0.185 | 0.180  | 85  | 90  | 224 | 121    |
| 53 | Non-switched memory B-cells                                      | 54 | 0.593 | 0.301 | -0.332 | 121 | 134 | 130 | 126.5  |
| 54 | Naive CD8 <sup>+</sup> CD27 <sup>+</sup> cells                   | 54 | 0.403 | 0.275 | 0.247  | 110 | 121 | 171 | 128    |
| 55 | CD4 <sup>+</sup> CD28 <sup>+</sup> cells                         | 54 | 0.369 | 0.142 | 0.062  | 61  | 73  | 332 | 131.75 |
| 56 | Age                                                              | 62 | 0.396 | 0.221 | 0.178  | 100 | 102 | 226 | 132    |
| 57 | Naive CD8 <sup>+</sup> cells                                     | 54 | 0.403 | 0.283 | 0.237  | 113 | 125 | 180 | 132.75 |
| 58 | CTLA-4                                                           | 62 | 0.438 | 0.253 | 1.552  | 210 | 113 | 12  | 136.25 |
| 59 | miR-19a                                                          | 62 | 0.410 | 0.292 | 0.224  | 128 | 127 | 187 | 142.5  |
| 60 | Naive CD8 <sup>+</sup> CD28 <sup>+</sup> cells                   | 54 | 0.407 | 0.297 | 0.201  | 120 | 131 | 199 | 142.5  |
| 61 | Naive CD8 <sup>+</sup> CD27 <sup>+</sup> CD28 <sup>+</sup> cells | 54 | 0.409 | 0.310 | 0.225  | 124 | 141 | 185 | 143.5  |
| 62 | IL-8                                                             | 62 | 0.398 | 0.231 | 0.111  | 101 | 104 | 281 | 146.75 |
| 63 | EM CD8 <sup>+</sup> CD27 <sup>+</sup> CD28 <sup>+</sup> cells    | 54 | 0.414 | 0.334 | 0.224  | 134 | 153 | 186 | 151.75 |
| 64 | CD3 <sup>+</sup> cells                                           | 54 | 0.403 | 0.279 | 0.115  | 114 | 123 | 278 | 157.25 |
| 65 | Naive CD8 <sup>+</sup> CD27 <sup>+</sup> CD28 <sup>-</sup> cells | 54 | 0.432 | 0.445 | 0.483  | 178 | 206 | 70  | 158    |
| 66 | G8 score                                                         | 27 | 0.377 | 0.303 | 0.057  | 80  | 135 | 338 | 158.25 |
| 67 | CM CD8 <sup>+</sup> CD27 <sup>+</sup> CD28 <sup>-</sup> cells    | 54 | 0.425 | 0.401 | 0.295  | 163 | 182 | 143 | 162.75 |
| 68 | IP-10                                                            | 62 | 0.419 | 0.343 | 0.200  | 148 | 156 | 200 | 163    |
| 69 | miR-92a                                                          | 62 | 0.412 | 0.299 | 0.124  | 131 | 132 | 272 | 166.5  |
| 70 | EM CD8 <sup>+</sup> CD27 <sup>+</sup> cells                      | 54 | 0.422 | 0.385 | 0.214  | 158 | 172 | 194 | 170.5  |
| 71 | Classical monocytes                                              | 54 | 0.598 | 0.274 | -0.049 | 108 | 120 | 346 | 170.5  |
| 72 | CD86                                                             | 62 | 0.573 | 0.393 | -0.250 | 170 | 180 | 168 | 172    |
| 73 | Plasmacytoid dendritic cells                                     | 54 | 0.583 | 0.354 | -0.141 | 140 | 159 | 255 | 173.5  |
| 74 | CD4 <sup>+</sup> Tregs                                           | 54 | 0.415 | 0.344 | 0.131  | 138 | 157 | 264 | 174.25 |
| 75 | miR-18a                                                          | 62 | 0.579 | 0.355 | -0.157 | 154 | 164 | 242 | 178.5  |
| 76 | Gal-9                                                            | 62 | 0.435 | 0.449 | 0.329  | 193 | 207 | 132 | 181.25 |
| 77 | Class-switched memory B-cells                                    | 54 | 0.575 | 0.401 | -0.181 | 164 | 183 | 222 | 183.25 |
| 78 | miR-19b                                                          | 62 | 0.572 | 0.398 | -0.173 | 174 | 181 | 229 | 189.5  |
| 79 | EM CD8 <sup>+</sup> CD28 <sup>+</sup> cells                      | 54 | 0.422 | 0.389 | 0.124  | 159 | 175 | 273 | 191.5  |
| 80 | miR-181a                                                         | 62 | 0.419 | 0.342 | 0.059  | 149 | 155 | 337 | 197.5  |
| 81 | Naive Tregs                                                      | 54 | 0.579 | 0.378 | -0.064 | 150 | 168 | 329 | 199.25 |
| 82 | CM CD4 <sup>+</sup> CD57 <sup>+</sup> cells                      | 54 | 0.445 | 0.543 | 0.435  | 231 | 256 | 90  | 202    |



|     |                                                                  |    |       |       |        |     |     |     |        |
|-----|------------------------------------------------------------------|----|-------|-------|--------|-----|-----|-----|--------|
| 83  | CD4 <sup>+</sup> CD27 <sup>+</sup> CD28 <sup>+</sup> cells       | 54 | 0.426 | 0.410 | 0.100  | 167 | 190 | 289 | 203.25 |
| 84  | let-7i                                                           | 62 | 0.418 | 0.334 | -0.019 | 145 | 154 | 380 | 206    |
| 85  | IL-17F                                                           | 62 | 0.469 | 0.443 | 1.513  | 315 | 204 | 13  | 211.75 |
| 86  | PD-L2                                                            | 62 | 0.433 | 0.439 | 0.094  | 189 | 200 | 294 | 218    |
| 87  | Free active TGF- $\beta$ 1                                       | 62 | 0.522 | 0.415 |        | 341 | 193 | 3   | 219.5  |
| 88  | CD4 <sup>+</sup> CD27 <sup>+</sup> cells                         | 54 | 0.432 | 0.451 | 0.084  | 182 | 214 | 305 | 220.75 |
| 89  | Hematopoietic stem cells                                         | 54 | 0.562 | 0.485 | -0.158 | 212 | 228 | 241 | 223.25 |
| 90  | sCD25                                                            | 62 | 0.447 | 0.539 | 0.241  | 236 | 251 | 174 | 224.25 |
| 91  | LAG-3                                                            | 62 | 0.565 | 0.449 | -0.057 | 194 | 208 | 339 | 233.75 |
| 92  | IL12p70                                                          | 62 | 0.463 | 0.670 | 0.469  | 288 | 296 | 77  | 237.25 |
| 93  | TEMRA CD4 <sup>+</sup> cells                                     | 54 | 0.537 | 0.688 | -0.473 | 286 | 302 | 76  | 237.5  |
| 94  | miR-155                                                          | 62 | 0.450 | 0.562 | 0.203  | 252 | 262 | 198 | 241    |
| 95  | Naive CD8 <sup>+</sup> CD57 <sup>+</sup> cells                   | 54 | 0.469 | 0.735 | 0.547  | 316 | 324 | 57  | 253.25 |
| 96  | Non-classical monocytes                                          | 54 | 0.455 | 0.619 | 0.162  | 270 | 282 | 239 | 265.25 |
| 97  | EM CD8 <sup>+</sup> cells                                        | 54 | 0.441 | 0.515 | 0.005  | 221 | 236 | 398 | 269    |
| 98  | B-cells                                                          | 54 | 0.444 | 0.541 | 0.019  | 230 | 255 | 381 | 274    |
| 99  | TEMRA CD4 <sup>+</sup> CD28 <sup>+</sup> cells                   | 54 | 0.532 | 0.731 | -0.276 | 312 | 322 | 154 | 275    |
| 100 | TNF- $\alpha$                                                    | 62 | 0.470 | 0.729 | 0.286  | 318 | 318 | 150 | 276    |
| 101 | EM CD8 <sup>+</sup> CD57 <sup>+</sup> cells                      | 54 | 0.532 | 0.731 | -0.271 | 313 | 323 | 160 | 277.25 |
| 102 | 4-1BB                                                            | 62 | 0.514 | 0.854 | -1.279 | 369 | 358 | 19  | 278.75 |
| 103 | Naive CD4 <sup>+</sup> CD57 <sup>+</sup> cells                   | 54 | 0.551 | 0.569 | 0.014  | 245 | 264 | 390 | 286    |
| 104 | Tumor size                                                       | 62 | 0.470 | 0.727 | 0.196  | 319 | 315 | 211 | 291    |
| 105 | CM CD4 <sup>+</sup> CD27 <sup>+</sup> CD28 <sup>+</sup> cells    | 54 | 0.491 | 0.920 | 1.146  | 382 | 382 | 20  | 291.5  |
| 106 | TEMRA CD8 <sup>+</sup> CD27 <sup>+</sup> cells                   | 54 | 0.532 | 0.721 | -0.156 | 305 | 314 | 244 | 292    |
| 107 | TEMRA CD4 <sup>+</sup> CD27 <sup>+</sup> cells                   | 54 | 0.536 | 0.692 | -0.088 | 291 | 303 | 299 | 296    |
| 108 | IL-10                                                            | 62 | 0.484 | 0.859 | 0.351  | 359 | 360 | 125 | 300.75 |
| 109 | TEMRA CD4 <sup>+</sup> CD27 <sup>+</sup> CD28 <sup>+</sup> cells | 54 | 0.532 | 0.728 | -0.076 | 311 | 317 | 311 | 312.5  |
| 110 | miR-17                                                           | 62 | 0.471 | 0.735 | 0.100  | 320 | 325 | 288 | 313.25 |
| 111 | EM CD4 <sup>+</sup> CD28 <sup>+</sup> cells                      | 54 | 0.533 | 0.717 | -0.054 | 302 | 313 | 342 | 314.75 |
| 112 | EM CD4 <sup>+</sup> cells                                        | 54 | 0.529 | 0.750 | -0.098 | 321 | 329 | 290 | 315.25 |
| 113 | CD56 <sup>dim</sup> CD16 <sup>+</sup> NK-cells                   | 54 | 0.535 | 0.702 | -0.024 | 292 | 307 | 375 | 316.5  |
| 114 | IL-27                                                            | 62 | 0.482 | 0.834 | 0.157  | 350 | 352 | 243 | 323.75 |
| 115 | miR-9                                                            | 62 | 0.484 | 0.829 | 0.141  | 357 | 351 | 254 | 329.75 |
| 116 | EM CD4 <sup>+</sup> CD27 <sup>+</sup> CD28 <sup>+</sup> cells    | 54 | 0.532 | 0.731 | 0.016  | 310 | 321 | 385 | 331.5  |
| 117 | Naive CD4 <sup>+</sup> CD27 <sup>+</sup> CD28 <sup>+</sup> cells | 54 | 0.526 | 0.772 | -0.050 | 327 | 334 | 345 | 333.25 |
| 118 | EM CD4 <sup>+</sup> CD27 <sup>+</sup> cells                      | 54 | 0.532 | 0.731 | 0.006  | 309 | 320 | 396 | 333.5  |
| 119 | miR-326                                                          | 62 | 0.501 | 0.992 | -0.276 | 401 | 401 | 157 | 340    |
| 120 | TEMRA CD8 <sup>+</sup> CD27 <sup>+</sup> CD28 <sup>+</sup> cells | 54 | 0.508 | 0.938 | -0.167 | 389 | 389 | 233 | 350    |
| 121 | miR-21                                                           | 62 | 0.488 | 0.898 | 0.095  | 375 | 374 | 293 | 354.25 |
| 122 | Myeloid dendritic cells                                          | 54 | 0.512 | 0.900 | 0.075  | 374 | 376 | 313 | 359.25 |
| 123 | TEMRA CD8 <sup>+</sup> CD28 <sup>+</sup> cells                   | 54 | 0.492 | 0.938 | -0.104 | 390 | 390 | 284 | 363.5  |
| 124 | Naive CD4 <sup>+</sup> CD28 <sup>+</sup> cells                   | 54 | 0.514 | 0.885 | -0.043 | 367 | 368 | 352 | 363.5  |
| 125 | Naive CD4 <sup>+</sup> CD27 <sup>+</sup> cells                   | 54 | 0.513 | 0.894 | -0.049 | 372 | 372 | 347 | 365.75 |
| 126 | miR-146a                                                         | 62 | 0.503 | 0.974 | 0.114  | 398 | 397 | 279 | 368    |
| 127 | IL-1 $\beta$                                                     | 62 | 0.509 | 0.923 | 0.074  | 386 | 383 | 317 | 368    |

|     |                                                                  |    |       |       |        |     |     |     |        |
|-----|------------------------------------------------------------------|----|-------|-------|--------|-----|-----|-----|--------|
| 128 | Naive CD4 <sup>+</sup> cells                                     | 54 | 0.513 | 0.894 | -0.037 | 371 | 371 | 361 | 368.5  |
| 129 | miR-150                                                          | 62 | 0.504 | 0.968 | -0.096 | 395 | 395 | 291 | 369    |
| 130 | CD56 <sup>bright</sup> CD16 <sup>-</sup> NK-cells                | 54 | 0.507 | 0.946 | 0.068  | 391 | 391 | 325 | 374.5  |
| 131 | IGF-1                                                            | 62 | 0.510 | 0.918 | -0.023 | 381 | 381 | 376 | 379.75 |
| 132 | miR-223                                                          | 62 | 0.488 | 0.898 | -0.008 | 376 | 375 | 394 | 380.25 |
| 133 | IFN- $\gamma$                                                    | 62 | 0.508 | 0.929 | 0.015  | 388 | 387 | 388 | 387.75 |
| 134 | Naive CD4 <sup>+</sup> CD27 <sup>-</sup> CD28 <sup>-</sup> cells | 54 | 0.503 | 0.985 | -0.024 | 400 | 400 | 374 | 393.5  |
