# Supplementary material for: Blood Immunosenescence Signatures Reflecting Age, Frailty and Tumor Immune Infiltrate in Patients with Early Luminal Breast Cancer
Source: MDPI journal article supplement (doi:10.3390/cancers13092185), 2021-05-02
Supplement: s1 [file s1]

Table S4: Individual performances of biomarkers correlating with CD3 infiltration in the whole tumor (high, intermediate or low infiltration). The table reports the number of patients (N) for which the biomarkers could be measured. The area under the curve (AUC) via receiver operating characteristics (ROC), P-value (Wilcox rank-sum test) and log fold change (FC) are reported for each biomarker. The log FC compared case vs. control. A positive log FC indicates that the measurement is higher than its reference while a negative measurement indicates that is smaller. Based on these statistics AUC, P-value, log FC scores were computed. The final score combines the 3 scores, where AUC weighted double. The biomarkers are ranked based on their final score.

|                              | Blood markers                                                    | N  | AUC   | P-value | log FC | AUC score | P-value score | log FC score | Final score |
|------------------------------|------------------------------------------------------------------|----|-------|---------|--------|-----------|---------------|--------------|-------------|
| <b>HIGH CD3 INFILTRATION</b> |                                                                  |    |       |         |        |           |               |              |             |
| 1                            | Tumor grade                                                      | 61 | 0.207 | 0.000   | 0.351  | 1         | 1             | 116          | 29.75       |
| 2                            | Gal-9                                                            | 61 | 0.668 | 0.052   | -0.707 | 30        | 27            | 48           | 33.75       |
| 3                            | Age                                                              | 61 | 0.753 | 0.004   | -0.328 | 3         | 2             | 127          | 33.75       |
| 4                            | miR-195                                                          | 61 | 0.346 | 0.077   | 0.964  | 40        | 36            | 25           | 35.25       |
| 5                            | IL-1 $\alpha$                                                    | 61 | 0.703 | 0.019   | -0.420 | 16        | 16            | 96           | 36          |
| 6                            | TEMRA CD8 <sup>+</sup> CD27 <sup>+</sup> cells                   | 53 | 0.312 | 0.040   | 0.473  | 21        | 22            | 83           | 36.75       |
| 7                            | TIM-3                                                            | 61 | 0.648 | 0.089   | -0.542 | 42        | 41            | 70           | 48.75       |
| 8                            | miR-20a                                                          | 61 | 0.324 | 0.043   | 0.342  | 26        | 24            | 122          | 49.5        |
| 9                            | miR-326                                                          | 61 | 0.620 | 0.105   | -0.921 | 69        | 48            | 26           | 53          |
| 10                           | TEMRA CD8 <sup>+</sup> CD27 <sup>+</sup> CD28 <sup>+</sup> cells | 53 | 0.355 | 0.113   | 0.405  | 44        | 55            | 102          | 61.25       |
| 11                           | miR-150                                                          | 61 | 0.372 | 0.143   | 0.617  | 62        | 66            | 57           | 61.75       |
| 12                           | sCD25                                                            | 61 | 0.635 | 0.122   | -0.355 | 51        | 57            | 114          | 68.25       |
| 13                           | miR-9                                                            | 61 | 0.398 | 0.173   | 1.553  | 99        | 76            | 12           | 71.5        |
| 14                           | 4-1BB                                                            | 61 | 0.401 | 0.172   | 2.494  | 106       | 74            | 4            | 72.5        |
| 15                           | IL-17A                                                           | 61 | 0.394 | 0.224   | 2.293  | 95        | 102           | 5            | 74.25       |
| 16                           | Intermediate monocytes                                           | 53 | 0.658 | 0.085   | -0.228 | 37        | 38            | 186          | 74.5        |
| 17                           | miR-126                                                          | 61 | 0.386 | 0.189   | 0.469  | 75        | 82            | 84           | 79          |
| 18                           | EM CD4 <sup>+</sup> CD27 <sup>+</sup> CD28 <sup>+</sup> cells    | 53 | 0.386 | 0.215   | 0.483  | 78        | 98            | 81           | 83.75       |
| 19                           | miR-424                                                          | 61 | 0.617 | 0.178   | -0.358 | 72        | 79            | 112          | 83.75       |
| 20                           | IL-6                                                             | 61 | 0.609 | 0.212   | -0.539 | 89        | 96            | 71           | 86.25       |
| 21                           | miR-223                                                          | 61 | 0.387 | 0.194   | 0.357  | 80        | 86            | 113          | 89.75       |
| 22                           | miR-125b                                                         | 61 | 0.388 | 0.200   | 0.337  | 83        | 88            | 124          | 94.5        |
| 23                           | miR-19b                                                          | 61 | 0.380 | 0.167   | 0.236  | 67        | 72            | 175          | 95.25       |
| 24                           | Naive CD8 <sup>+</sup> CD27 <sup>+</sup> CD28 <sup>+</sup> cells | 53 | 0.368 | 0.149   | 0.186  | 55        | 67            | 215          | 98          |
| 25                           | TEMRA CD4 <sup>+</sup> CD27 <sup>+</sup> cells                   | 53 | 0.394 | 0.246   | 0.343  | 93        | 108           | 120          | 103.5       |
| 26                           | TEMRA CD4 <sup>+</sup> CD27 <sup>+</sup> CD28 <sup>+</sup> cells | 53 | 0.399 | 0.272   | 0.342  | 103       | 116           | 121          | 110.75      |
| 27                           | Naive CD8 <sup>+</sup> CD57 <sup>+</sup> cells                   | 53 | 0.368 | 0.149   | 0.132  | 56        | 68            | 271          | 112.75      |
| 28                           | IFN- $\gamma$                                                    | 61 | 0.588 | 0.314   | -0.454 | 134       | 133           | 86           | 121.75      |
| 29                           | G8 score                                                         | 26 | 0.688 | 0.401   | -0.139 | 22        | 188           | 259          | 122.75      |
| 30                           | LAG-3                                                            | 61 | 0.417 | 0.348   | 0.602  | 146       | 149           | 58           | 124.75      |
| 31                           | TEMRA CD4 <sup>+</sup> CD27 <sup>+</sup> CD28 <sup>+</sup> cells | 53 | 0.412 | 0.338   | -0.411 | 133       | 144           | 99           | 127.25      |
| 32                           | IL-27                                                            | 61 | 0.586 | 0.323   | -0.367 | 138       | 136           | 110          | 130.5       |
| 33                           | IGF-1                                                            | 61 | 0.407 | 0.291   | 0.214  | 116       | 122           | 193          | 136.75      |
| 34                           | IL12p70                                                          | 61 | 0.577 | 0.379   | -0.623 | 165       | 168           | 55           | 138.25      |
| 35                           | PD-L1                                                            | 61 | 0.426 | 0.398   | 0.920  | 173       | 182           | 27           | 138.75      |
| 36                           | CD56 <sup>bright</sup> CD16 <sup>+</sup> NK-cells                | 53 | 0.409 | 0.323   | 0.234  | 121       | 137           | 180          | 139.75      |
| 37                           | EM CD8 <sup>+</sup> cells                                        | 53 | 0.590 | 0.332   | -0.196 | 127       | 140           | 208          | 150.5       |

|    |                                                                  |    |       |       |        |     |     |     |        |
|----|------------------------------------------------------------------|----|-------|-------|--------|-----|-----|-----|--------|
| 38 | CD8 <sup>+</sup> cells                                           | 53 | 0.410 | 0.332 | 0.197  | 128 | 141 | 207 | 151    |
| 39 | TEMRA CD8 <sup>+</sup> CD57 <sup>+</sup> cells                   | 53 | 0.414 | 0.352 | 0.232  | 139 | 152 | 183 | 153.25 |
| 40 | miR-18a                                                          | 61 | 0.417 | 0.340 | 0.223  | 143 | 145 | 190 | 155.25 |
| 41 | CM CD8 <sup>+</sup> CD57 <sup>+</sup> cells                      | 53 | 0.421 | 0.391 | 0.293  | 155 | 176 | 146 | 158    |
| 42 | CTLA-4                                                           | 61 | 0.438 | 0.270 | 0.402  | 208 | 115 | 104 | 158.75 |
| 43 | EM CD8 <sup>+</sup> CD28 <sup>+</sup> cells                      | 53 | 0.581 | 0.384 | -0.232 | 148 | 173 | 182 | 162.75 |
| 44 | Tregs                                                            | 53 | 0.579 | 0.391 | -0.249 | 157 | 177 | 164 | 163.75 |
| 45 | IP-10                                                            | 61 | 0.580 | 0.357 | -0.200 | 149 | 155 | 203 | 164    |
| 46 | Monocytes                                                        | 53 | 0.407 | 0.312 | 0.108  | 115 | 132 | 296 | 164.5  |
| 47 | TNF- $\alpha$                                                    | 61 | 0.565 | 0.455 | -0.598 | 198 | 210 | 60  | 166.5  |
| 48 | EM CD4 <sup>+</sup> CD27 <sup>+</sup> CD28 <sup>+</sup> cells    | 53 | 0.421 | 0.396 | 0.224  | 154 | 181 | 188 | 169.25 |
| 49 | CD4 <sup>+</sup> CD28 <sup>+</sup> cells                         | 53 | 0.608 | 0.238 | -0.009 | 90  | 106 | 393 | 169.75 |
| 50 | EM CD4 <sup>+</sup> CD27 <sup>+</sup> cells                      | 53 | 0.423 | 0.407 | 0.221  | 164 | 190 | 191 | 177.25 |
| 51 | miR-19a                                                          | 61 | 0.422 | 0.375 | 0.171  | 160 | 165 | 231 | 179    |
| 52 | Hematopoietic stem cells                                         | 53 | 0.565 | 0.478 | -0.408 | 200 | 224 | 101 | 181.25 |
| 53 | Classical monocytes                                              | 53 | 0.407 | 0.312 | 0.024  | 114 | 131 | 366 | 181.25 |
| 54 | MCP-1                                                            | 61 | 0.580 | 0.357 | -0.118 | 150 | 154 | 285 | 184.75 |
| 55 | let-7e                                                           | 61 | 0.564 | 0.466 | -0.331 | 204 | 220 | 126 | 188.5  |
| 56 | TEMRA CD4 <sup>+</sup> CD57 <sup>+</sup> cells                   | 53 | 0.439 | 0.506 | -0.423 | 213 | 235 | 94  | 188.75 |
| 57 | CM CD4 <sup>+</sup> CD27 <sup>+</sup> CD28 <sup>-</sup> cells    | 53 | 0.429 | 0.417 | -0.197 | 180 | 192 | 206 | 189.5  |
| 58 | TEMRA CD8 <sup>+</sup> cells                                     | 53 | 0.421 | 0.391 | 0.130  | 156 | 178 | 276 | 191.5  |
| 59 | PD-1                                                             | 61 | 0.440 | 0.492 | 0.386  | 219 | 229 | 105 | 193    |
| 60 | NK-like T-cells                                                  | 53 | 0.446 | 0.558 | 0.689  | 241 | 254 | 49  | 196.25 |
| 61 | miR-92a                                                          | 61 | 0.436 | 0.461 | 0.251  | 203 | 216 | 163 | 196.25 |
| 62 | IL-17F                                                           | 61 | 0.464 | 0.398 | 1.595  | 296 | 184 | 11  | 196.75 |
| 63 | sCD27                                                            | 61 | 0.562 | 0.481 | -0.247 | 209 | 225 | 167 | 202.5  |
| 64 | Tumor size                                                       | 61 | 0.567 | 0.437 | -0.169 | 193 | 203 | 232 | 205.25 |
| 65 | CD8 <sup>+</sup> CD57 <sup>+</sup> cells                         | 53 | 0.432 | 0.466 | 0.160  | 191 | 219 | 239 | 210    |
| 66 | miR-17                                                           | 61 | 0.436 | 0.466 | 0.192  | 205 | 221 | 210 | 210.25 |
| 67 | Free active TGF- $\beta$ 1                                       | 61 | 0.477 | 0.400 | 3.118  | 334 | 187 | 3   | 214.5  |
| 68 | miR-146a                                                         | 61 | 0.434 | 0.451 | 0.111  | 197 | 207 | 292 | 223.25 |
| 69 | CD4 <sup>+</sup> CD27 <sup>+</sup> CD28 <sup>-</sup> cells       | 53 | 0.423 | 0.402 | 0.016  | 163 | 189 | 380 | 223.75 |
| 70 | CM CD4 <sup>+</sup> CD27 <sup>+</sup> CD28 <sup>+</sup> cells    | 53 | 0.442 | 0.532 | 0.202  | 228 | 245 | 201 | 225.5  |
| 71 | CM CD4 <sup>+</sup> CD27 <sup>+</sup> cells                      | 53 | 0.445 | 0.556 | 0.201  | 239 | 253 | 202 | 233.25 |
| 72 | TEMRA CD8 <sup>+</sup> CD27 <sup>+</sup> CD28 <sup>-</sup> cells | 53 | 0.444 | 0.545 | 0.176  | 234 | 249 | 222 | 234.75 |
| 73 | CD4/CD8 ratio                                                    | 53 | 0.545 | 0.628 | -0.280 | 261 | 270 | 151 | 235.75 |
| 74 | CM CD8 <sup>+</sup> CD27 <sup>+</sup> cells                      | 53 | 0.458 | 0.650 | 0.316  | 274 | 281 | 135 | 241    |
| 75 | Naive CD4 <sup>+</sup> CD28 <sup>+</sup> cells                   | 53 | 0.555 | 0.552 | -0.157 | 238 | 252 | 243 | 242.75 |
| 76 | Class-switched memory B-cells                                    | 53 | 0.444 | 0.545 | 0.139  | 235 | 250 | 262 | 245.5  |
| 77 | miR-21                                                           | 61 | 0.456 | 0.615 | 0.205  | 263 | 264 | 200 | 247.5  |
| 78 | CD86                                                             | 61 | 0.542 | 0.637 | -0.240 | 275 | 274 | 169 | 248.25 |
| 79 | CD8 <sup>+</sup> CD28 <sup>+</sup> cells                         | 53 | 0.559 | 0.529 | -0.100 | 226 | 243 | 302 | 249.25 |
| 80 | CM CD8 <sup>+</sup> CD27 <sup>+</sup> CD28 <sup>-</sup> cells    | 53 | 0.438 | 0.499 | -0.043 | 210 | 232 | 351 | 250.75 |
| 81 | CM CD8 <sup>+</sup> CD27 <sup>+</sup> CD28 <sup>+</sup> cells    | 53 | 0.462 | 0.683 | 0.287  | 288 | 300 | 148 | 256    |
| 82 | Naive CD4 <sup>+</sup> CD27 <sup>+</sup> CD28 <sup>+</sup> cells | 53 | 0.546 | 0.625 | -0.147 | 257 | 268 | 252 | 258.5  |

|     |                                                                  |    |       |       |        |     |     |     |        |
|-----|------------------------------------------------------------------|----|-------|-------|--------|-----|-----|-----|--------|
| 83  | Naive CD4 <sup>+</sup> cells                                     | 53 | 0.546 | 0.625 | -0.137 | 256 | 267 | 263 | 260.5  |
| 84  | Non-classical monocytes                                          | 53 | 0.560 | 0.516 | -0.011 | 217 | 238 | 389 | 265.25 |
| 85  | TEMRA CD4 <sup>+</sup> CD28 <sup>+</sup> cells                   | 53 | 0.462 | 0.683 | 0.198  | 286 | 298 | 205 | 268.75 |
| 86  | CRP                                                              | 61 | 0.539 | 0.660 | -0.173 | 282 | 285 | 228 | 269.25 |
| 87  | Naive CD4 <sup>+</sup> CD27 <sup>-</sup> CD28 <sup>-</sup> cells | 53 | 0.447 | 0.565 | -0.048 | 242 | 256 | 347 | 271.75 |
| 88  | Myeloid dendritic cells                                          | 53 | 0.460 | 0.664 | 0.155  | 278 | 289 | 244 | 272.25 |
| 89  | B-cells                                                          | 53 | 0.553 | 0.569 | -0.050 | 243 | 258 | 345 | 272.25 |
| 90  | Naive CD4 <sup>+</sup> CD27 <sup>+</sup> cells                   | 53 | 0.544 | 0.639 | -0.117 | 266 | 275 | 286 | 273.25 |
| 91  | CM CD8 <sup>+</sup> CD28 <sup>+</sup> cells                      | 53 | 0.464 | 0.701 | 0.182  | 292 | 306 | 218 | 277    |
| 92  | CD4 <sup>+</sup> cells                                           | 53 | 0.544 | 0.639 | -0.095 | 267 | 276 | 307 | 279.25 |
| 93  | IL-10                                                            | 61 | 0.527 | 0.763 | -0.249 | 323 | 327 | 165 | 284.5  |
| 94  | Naive B-cells                                                    | 53 | 0.544 | 0.639 | -0.061 | 268 | 277 | 334 | 286.75 |
| 95  | CD8 <sup>+</sup> CD27 <sup>-</sup> CD28 <sup>-</sup> cells       | 53 | 0.462 | 0.683 | 0.112  | 287 | 299 | 290 | 290.75 |
| 96  | T-cell <i>P16</i> <sup>NK4a</sup>                                | 41 | 0.508 | 0.952 | -0.756 | 376 | 380 | 43  | 293.75 |
| 97  | PD-L2                                                            | 61 | 0.538 | 0.673 | -0.083 | 290 | 291 | 315 | 296.5  |
| 98  | Lymph node involvement                                           | 61 | 0.528 | 0.721 | -0.161 | 319 | 312 | 238 | 297    |
| 99  | CD4 <sup>+</sup> CD27 <sup>+</sup> cells                         | 53 | 0.462 | 0.679 | 0.063  | 285 | 296 | 332 | 299.5  |
| 100 | IL-8                                                             | 61 | 0.539 | 0.657 | -0.036 | 283 | 283 | 356 | 301.25 |
| 101 | CM CD8 <sup>+</sup> cells                                        | 53 | 0.476 | 0.801 | 0.200  | 333 | 342 | 204 | 303    |
| 102 | NK-cells                                                         | 53 | 0.538 | 0.683 | -0.061 | 289 | 301 | 333 | 303    |
| 103 | IL-1β                                                            | 61 | 0.514 | 0.873 | -0.341 | 366 | 362 | 123 | 304.25 |
| 104 | EM CD8 <sup>+</sup> CD27 <sup>+</sup> cells                      | 53 | 0.467 | 0.724 | -0.108 | 306 | 313 | 294 | 304.75 |
| 105 | CD4 <sup>+</sup> Tregs                                           | 53 | 0.540 | 0.664 | 0.011  | 279 | 288 | 388 | 308.5  |
| 106 | CM CD4 <sup>+</sup> cells                                        | 53 | 0.471 | 0.757 | 0.116  | 313 | 323 | 287 | 309    |
| 107 | CM CD4 <sup>+</sup> CD28 <sup>+</sup> cells                      | 53 | 0.474 | 0.788 | 0.119  | 330 | 335 | 284 | 319.75 |
| 108 | CD4 <sup>+</sup> CD27 <sup>+</sup> CD28 <sup>+</sup> cells       | 53 | 0.473 | 0.772 | 0.050  | 321 | 330 | 343 | 328.75 |
| 109 | let-7i                                                           | 61 | 0.529 | 0.744 | -0.023 | 315 | 318 | 369 | 329.25 |
| 110 | CD4 <sup>+</sup> CD57 <sup>+</sup> cells                         | 53 | 0.473 | 0.772 | -0.050 | 322 | 331 | 344 | 329.75 |
| 111 | miR-155                                                          | 61 | 0.497 | 0.980 | 0.253  | 391 | 392 | 162 | 334    |
| 112 | EM CD4 <sup>+</sup> CD57 <sup>+</sup> cells                      | 53 | 0.499 | 1.000 | 0.313  | 400 | 400 | 137 | 334.25 |
| 113 | EM CD8 <sup>+</sup> CD27 <sup>+</sup> CD28 <sup>+</sup> cells    | 53 | 0.482 | 0.850 | -0.123 | 352 | 355 | 280 | 334.75 |
| 114 | Plasmacytoid dendritic cells                                     | 53 | 0.501 | 1.000 | -0.275 | 401 | 401 | 154 | 339.25 |
| 115 | Naive CD4 <sup>+</sup> CD57 <sup>+</sup> cells                   | 53 | 0.478 | 0.817 | -0.053 | 339 | 346 | 341 | 341.25 |
| 116 | CD8 <sup>+</sup> CD27 <sup>+</sup> cells                         | 53 | 0.482 | 0.848 | 0.076  | 351 | 354 | 320 | 344    |
| 117 | EM CD8 <sup>+</sup> CD57 <sup>+</sup> cells                      | 53 | 0.474 | 0.788 | -0.014 | 331 | 336 | 381 | 344.75 |
| 118 | EM CD4 <sup>+</sup> cells                                        | 53 | 0.485 | 0.880 | 0.106  | 363 | 366 | 297 | 347.25 |
| 119 | CD8 <sup>+</sup> CD27 <sup>+</sup> CD28 <sup>+</sup> cells       | 53 | 0.480 | 0.832 | 0.035  | 347 | 351 | 358 | 350.75 |
| 120 | Non-switched memory B-cells                                      | 53 | 0.478 | 0.819 | -0.013 | 341 | 348 | 383 | 353.25 |
| 121 | TEMRA CD8 <sup>+</sup> CD28 <sup>+</sup> cells                   | 53 | 0.514 | 0.888 | -0.091 | 368 | 371 | 310 | 354.25 |
| 122 | CD56 <sup>dim</sup> CD16 <sup>+</sup> NK-cells                   | 53 | 0.522 | 0.819 | -0.005 | 340 | 347 | 398 | 356.25 |
| 123 | EM CD8 <sup>+</sup> CD27 <sup>-</sup> CD28 <sup>-</sup> cells    | 53 | 0.506 | 0.952 | -0.116 | 380 | 381 | 288 | 357.25 |
| 124 | EM CD4 <sup>+</sup> CD28 <sup>+</sup> cells                      | 53 | 0.518 | 0.850 | 0.022  | 353 | 356 | 371 | 358.25 |
| 125 | CM CD4 <sup>+</sup> CD57 <sup>+</sup> cells                      | 53 | 0.484 | 0.864 | -0.018 | 357 | 360 | 377 | 362.75 |
| 126 | Naive CD8 <sup>+</sup> CD27 <sup>+</sup> cells                   | 53 | 0.495 | 0.960 | -0.097 | 383 | 384 | 303 | 363.25 |
| 127 | TEMRA CD4 <sup>+</sup> cells                                     | 53 | 0.493 | 0.944 | -0.071 | 377 | 377 | 324 | 363.75 |

|                                      |                                                                  |    |       |       |        |     |     |     |        |
|--------------------------------------|------------------------------------------------------------------|----|-------|-------|--------|-----|-----|-----|--------|
| 128                                  | Naive CD8 <sup>+</sup> CD27 <sup>+</sup> CD28 <sup>+</sup> cells | 53 | 0.496 | 0.976 | -0.110 | 388 | 389 | 293 | 364.5  |
| 129                                  | Naive CD8 <sup>+</sup> cells                                     | 53 | 0.507 | 0.944 | -0.057 | 378 | 378 | 339 | 368.25 |
| 130                                  | Naive CD8 <sup>+</sup> CD28 <sup>+</sup> cells                   | 53 | 0.504 | 0.976 | -0.083 | 389 | 388 | 313 | 369.75 |
| 131                                  | Memory Tregs                                                     | 53 | 0.489 | 0.913 | 0.031  | 374 | 375 | 362 | 371.25 |
| 132                                  | CD3 <sup>+</sup> cells                                           | 53 | 0.493 | 0.944 | 0.009  | 379 | 376 | 391 | 381.25 |
| 133                                  | Naive Tregs                                                      | 53 | 0.505 | 0.960 | -0.006 | 384 | 386 | 397 | 387.75 |
| 134                                  | miR-181a                                                         | 61 | 0.499 | 0.993 | 0.033  | 397 | 399 | 360 | 388.25 |
| <b>INTERMEDIATE CD3 INFILTRATION</b> |                                                                  |    |       |       |        |     |     |     |        |
| 1                                    | Naive CD8 <sup>+</sup> CD57 <sup>+</sup> cells                   | 53 | 0.720 | 0.006 | -1.093 | 8   | 3   | 20  | 9.75   |
| 2                                    | CM CD8 <sup>+</sup> CD27 <sup>+</sup> CD28 <sup>+</sup> cells    | 53 | 0.712 | 0.007 | -1.048 | 11  | 7   | 23  | 13     |
| 3                                    | CM CD8 <sup>+</sup> CD27 <sup>+</sup> cells                      | 53 | 0.711 | 0.009 | -1.048 | 12  | 10  | 24  | 14.5   |
| 4                                    | Naive CD8 <sup>+</sup> CD27 <sup>-</sup> CD28 <sup>-</sup> cells | 53 | 0.717 | 0.007 | -0.757 | 9   | 5   | 42  | 16.25  |
| 5                                    | CM CD8 <sup>+</sup> CD28 <sup>+</sup> cells                      | 53 | 0.710 | 0.009 | -0.900 | 13  | 11  | 31  | 17     |
| 6                                    | T-cell <i>P16<sup>INK4a</sup></i>                                | 41 | 0.306 | 0.034 | 1.532  | 18  | 21  | 14  | 17.75  |
| 7                                    | CM CD8 <sup>+</sup> cells                                        | 53 | 0.705 | 0.011 | -0.879 | 14  | 13  | 32  | 18.25  |
| 8                                    | CM CD8 <sup>+</sup> CD57 <sup>+</sup> cells                      | 53 | 0.713 | 0.008 | -0.746 | 10  | 8   | 45  | 18.25  |
| 9                                    | miR-92a                                                          | 61 | 0.679 | 0.017 | -0.496 | 24  | 14  | 79  | 35.25  |
| 10                                   | CM CD4 <sup>+</sup> CD27 <sup>+</sup> CD28 <sup>+</sup> cells    | 53 | 0.635 | 0.093 | -0.596 | 50  | 43  | 61  | 51     |
| 11                                   | CM CD4 <sup>+</sup> CD27 <sup>+</sup> cells                      | 53 | 0.634 | 0.096 | -0.595 | 54  | 46  | 62  | 54     |
| 12                                   | CM CD4 <sup>+</sup> cells                                        | 53 | 0.628 | 0.112 | -0.554 | 59  | 53  | 67  | 59.5   |
| 13                                   | CM CD4 <sup>+</sup> CD28 <sup>+</sup> cells                      | 53 | 0.628 | 0.112 | -0.553 | 60  | 54  | 68  | 60.5   |
| 14                                   | miR-181a                                                         | 61 | 0.626 | 0.093 | -0.440 | 63  | 44  | 88  | 64.5   |
| 15                                   | miR-326                                                          | 61 | 0.403 | 0.125 | 0.825  | 108 | 58  | 37  | 77.75  |
| 16                                   | CM CD4 <sup>+</sup> CD57 <sup>+</sup> cells                      | 53 | 0.610 | 0.173 | -0.562 | 87  | 77  | 64  | 78.75  |
| 17                                   | CM CD8 <sup>+</sup> CD27 <sup>-</sup> CD28 <sup>-</sup> cells    | 53 | 0.635 | 0.094 | -0.240 | 52  | 45  | 170 | 79.75  |
| 18                                   | miR-17                                                           | 61 | 0.614 | 0.128 | -0.325 | 77  | 59  | 129 | 85.5   |
| 19                                   | miR-223                                                          | 61 | 0.610 | 0.141 | -0.343 | 86  | 64  | 119 | 88.75  |
| 20                                   | PD-1                                                             | 61 | 0.404 | 0.201 | 0.618  | 110 | 90  | 56  | 91.5   |
| 21                                   | IL-1 $\alpha$                                                    | 61 | 0.372 | 0.086 | 0.190  | 58  | 39  | 212 | 91.75  |
| 22                                   | Gal-9                                                            | 61 | 0.386 | 0.129 | 0.237  | 76  | 60  | 174 | 96.5   |
| 23                                   | miR-150                                                          | 61 | 0.596 | 0.202 | -0.499 | 111 | 91  | 78  | 97.75  |
| 24                                   | CD56 <sup>bright</sup> CD16 <sup>-</sup> NK-cells                | 53 | 0.606 | 0.188 | -0.318 | 94  | 81  | 132 | 100.25 |
| 25                                   | CRP                                                              | 61 | 0.600 | 0.183 | -0.346 | 104 | 80  | 118 | 101.5  |
| 26                                   | Tumor grade                                                      | 61 | 0.613 | 0.074 | -0.148 | 81  | 33  | 250 | 111.25 |
| 27                                   | IL-27                                                            | 61 | 0.381 | 0.111 | 0.140  | 70  | 50  | 257 | 111.75 |
| 28                                   | Naive CD4 <sup>+</sup> CD57 <sup>+</sup> cells                   | 53 | 0.588 | 0.274 | -0.519 | 131 | 118 | 75  | 113.75 |
| 29                                   | CD86                                                             | 61 | 0.410 | 0.230 | 0.385  | 124 | 105 | 106 | 114.75 |
| 30                                   | miR-146a                                                         | 61 | 0.591 | 0.223 | -0.323 | 118 | 101 | 130 | 116.75 |
| 31                                   | CTLA-4                                                           | 61 | 0.567 | 0.169 | -1.402 | 196 | 73  | 16  | 120.25 |
| 32                                   | EM CD4 <sup>+</sup> CD57 <sup>+</sup> cells                      | 53 | 0.401 | 0.220 | 0.225  | 107 | 100 | 187 | 125.25 |
| 33                                   | EM CD8 <sup>+</sup> CD27 <sup>+</sup> cells                      | 53 | 0.610 | 0.173 | -0.140 | 88  | 78  | 258 | 128    |
| 34                                   | NK-cells                                                         | 53 | 0.409 | 0.261 | 0.234  | 119 | 114 | 179 | 132.75 |
| 35                                   | IFN- $\gamma$                                                    | 61 | 0.410 | 0.227 | 0.232  | 123 | 104 | 181 | 132.75 |
| 36                                   | Naive B-cells                                                    | 53 | 0.593 | 0.253 | -0.215 | 117 | 110 | 192 | 134    |
| 37                                   | Age                                                              | 61 | 0.388 | 0.135 | 0.093  | 82  | 63  | 309 | 134    |

|    |                                                                  |    |       |       |        |     |     |     |        |
|----|------------------------------------------------------------------|----|-------|-------|--------|-----|-----|-----|--------|
| 38 | Lymph node involvement                                           | 61 | 0.426 | 0.257 | 0.422  | 175 | 111 | 95  | 139    |
| 39 | IL-17F                                                           | 61 | 0.553 | 0.141 | -7.536 | 245 | 65  | 2   | 139.25 |
| 40 | PD-L1                                                            | 61 | 0.415 | 0.257 | -0.239 | 140 | 112 | 171 | 140.75 |
| 41 | TEMRA CD4 <sup>+</sup> CD57 <sup>+</sup> cells                   | 53 | 0.429 | 0.378 | 0.761  | 181 | 167 | 41  | 142.5  |
| 42 | EM CD8 <sup>+</sup> CD27 <sup>+</sup> CD28 <sup>+</sup> cells    | 53 | 0.603 | 0.205 | -0.120 | 98  | 93  | 283 | 143    |
| 43 | CD8 <sup>+</sup> CD27 <sup>+</sup> cells                         | 53 | 0.588 | 0.274 | -0.211 | 132 | 119 | 194 | 144.25 |
| 44 | CD4 <sup>+</sup> CD27 <sup>+</sup> cells                         | 53 | 0.591 | 0.259 | -0.153 | 120 | 113 | 248 | 150.25 |
| 45 | TIM-3                                                            | 61 | 0.394 | 0.156 | -0.029 | 92  | 70  | 363 | 154.25 |
| 46 | TEMRA CD8 <sup>+</sup> CD27 <sup>+</sup> cells                   | 53 | 0.582 | 0.310 | -0.209 | 147 | 129 | 195 | 154.5  |
| 47 | let-7e                                                           | 61 | 0.574 | 0.327 | -0.291 | 174 | 139 | 147 | 158.5  |
| 48 | miR-424                                                          | 61 | 0.424 | 0.309 | 0.223  | 166 | 128 | 189 | 162.25 |
| 49 | CD8 <sup>+</sup> CD27 <sup>+</sup> CD28 <sup>+</sup> cells       | 53 | 0.580 | 0.323 | -0.186 | 151 | 138 | 214 | 163.5  |
| 50 | CD4 <sup>+</sup> CD27 <sup>+</sup> CD28 <sup>+</sup> cells       | 53 | 0.584 | 0.301 | -0.145 | 142 | 124 | 255 | 165.75 |
| 51 | IL-10                                                            | 61 | 0.428 | 0.337 | 0.248  | 178 | 143 | 166 | 166.25 |
| 52 | IL12p70                                                          | 61 | 0.431 | 0.356 | 0.268  | 188 | 153 | 155 | 171    |
| 53 | TEMRA CD4 <sup>+</sup> CD27 <sup>+</sup> CD28 <sup>-</sup> cells | 53 | 0.440 | 0.460 | 0.806  | 222 | 214 | 39  | 174.25 |
| 54 | CD4/CD8 ratio                                                    | 53 | 0.570 | 0.388 | -0.235 | 187 | 175 | 178 | 181.75 |
| 55 | EM CD8 <sup>+</sup> CD27 <sup>+</sup> CD28 <sup>-</sup> cells    | 53 | 0.439 | 0.455 | 0.429  | 216 | 209 | 91  | 183    |
| 56 | CD8 <sup>+</sup> cells                                           | 53 | 0.423 | 0.344 | 0.133  | 162 | 148 | 270 | 185.5  |
| 57 | miR-155                                                          | 61 | 0.559 | 0.436 | -0.433 | 227 | 202 | 89  | 186.25 |
| 58 | miR-20a                                                          | 61 | 0.573 | 0.334 | -0.142 | 177 | 142 | 256 | 188    |
| 59 | TEMRA CD8 <sup>+</sup> CD28 <sup>+</sup> cells                   | 53 | 0.435 | 0.423 | 0.237  | 201 | 197 | 173 | 193    |
| 60 | miR-21                                                           | 61 | 0.562 | 0.411 | -0.257 | 211 | 191 | 160 | 193.25 |
| 61 | miR-126                                                          | 61 | 0.560 | 0.423 | -0.255 | 218 | 196 | 161 | 198.25 |
| 62 | IL-1 $\beta$                                                     | 61 | 0.433 | 0.370 | 0.153  | 194 | 162 | 247 | 199.25 |
| 63 | IGF-1                                                            | 61 | 0.567 | 0.378 | -0.147 | 195 | 166 | 253 | 202.25 |
| 64 | 4-1BB                                                            | 61 | 0.540 | 0.528 | -1.661 | 281 | 241 | 9   | 203    |
| 65 | TNF- $\alpha$                                                    | 61 | 0.430 | 0.351 | 0.104  | 186 | 150 | 298 | 205    |
| 66 | CD4 <sup>+</sup> CD27 <sup>+</sup> CD28 <sup>-</sup> cells       | 53 | 0.449 | 0.533 | 0.431  | 250 | 246 | 90  | 209    |
| 67 | Naive CD4 <sup>+</sup> CD28 <sup>+</sup> cells                   | 53 | 0.432 | 0.398 | 0.126  | 189 | 183 | 278 | 209.75 |
| 68 | TEMRA CD4 <sup>+</sup> cells                                     | 53 | 0.449 | 0.531 | 0.408  | 249 | 244 | 100 | 210.5  |
| 69 | Non-switched memory B-cells                                      | 53 | 0.440 | 0.463 | 0.236  | 224 | 218 | 177 | 210.75 |
| 70 | EM CD4 <sup>+</sup> CD27 <sup>+</sup> CD28 <sup>+</sup> cells    | 53 | 0.557 | 0.485 | -0.239 | 233 | 228 | 172 | 216.5  |
| 71 | Monocytes                                                        | 53 | 0.561 | 0.453 | -0.171 | 214 | 208 | 230 | 216.5  |
| 72 | Plasmacytoid dendritic cells                                     | 53 | 0.447 | 0.516 | 0.303  | 244 | 237 | 142 | 216.75 |
| 73 | EM CD4 <sup>+</sup> CD27 <sup>+</sup> cells                      | 53 | 0.556 | 0.496 | -0.229 | 236 | 230 | 185 | 221.75 |
| 74 | CD4 <sup>+</sup> Tregs                                           | 53 | 0.560 | 0.460 | -0.168 | 220 | 213 | 234 | 221.75 |
| 75 | Tumor size                                                       | 61 | 0.435 | 0.386 | -0.037 | 202 | 174 | 353 | 232.75 |
| 76 | sCD25                                                            | 61 | 0.432 | 0.370 | 0.005  | 192 | 160 | 400 | 236    |
| 77 | IP-10                                                            | 61 | 0.437 | 0.399 | 0.042  | 207 | 186 | 352 | 238    |
| 78 | Naive CD4 <sup>+</sup> cells                                     | 53 | 0.440 | 0.463 | 0.104  | 221 | 217 | 300 | 239.75 |
| 79 | TEMRA CD8 <sup>+</sup> CD27 <sup>+</sup> CD28 <sup>+</sup> cells | 53 | 0.560 | 0.460 | -0.090 | 223 | 215 | 311 | 243    |
| 80 | miR-18a                                                          | 61 | 0.551 | 0.502 | -0.162 | 251 | 234 | 237 | 243.25 |
| 81 | Naive CD4 <sup>+</sup> CD27 <sup>+</sup> CD28 <sup>+</sup> cells | 53 | 0.443 | 0.485 | 0.121  | 232 | 227 | 282 | 243.25 |
| 82 | Naive CD4 <sup>+</sup> CD27 <sup>+</sup> cells                   | 53 | 0.443 | 0.485 | 0.096  | 231 | 226 | 306 | 248.5  |

|     |                                                                  |    |       |       |        |     |     |     |        |
|-----|------------------------------------------------------------------|----|-------|-------|--------|-----|-----|-----|--------|
| 83  | let-7i                                                           | 61 | 0.561 | 0.419 | 0.021  | 215 | 194 | 375 | 249.75 |
| 84  | CD4 <sup>+</sup> CD57 <sup>+</sup> cells                         | 53 | 0.466 | 0.678 | 0.362  | 301 | 295 | 111 | 252    |
| 85  | CM CD4 <sup>+</sup> CD27 <sup>+</sup> CD28 <sup>+</sup> cells    | 53 | 0.522 | 0.780 | -1.057 | 338 | 332 | 22  | 257.5  |
| 86  | Naive CD4 <sup>+</sup> CD27 <sup>+</sup> CD28 <sup>+</sup> cells | 53 | 0.552 | 0.522 | -0.096 | 246 | 240 | 305 | 259.25 |
| 87  | miR-19a                                                          | 61 | 0.544 | 0.559 | -0.147 | 265 | 255 | 254 | 259.75 |
| 88  | MCP-1                                                            | 61 | 0.555 | 0.466 | -0.056 | 240 | 222 | 340 | 260.5  |
| 89  | Class-switched memory B-cells                                    | 53 | 0.454 | 0.575 | 0.104  | 259 | 259 | 299 | 269    |
| 90  | CD56 <sup>dim</sup> CD16 <sup>+</sup> NK-cells                   | 53 | 0.444 | 0.496 | 0.022  | 237 | 231 | 373 | 269.5  |
| 91  | Memory Tregs                                                     | 53 | 0.547 | 0.566 | -0.083 | 254 | 257 | 314 | 269.75 |
| 92  | miR-9                                                            | 61 | 0.517 | 0.795 | -0.855 | 355 | 337 | 35  | 270.5  |
| 93  | EM CD4 <sup>+</sup> CD27 <sup>+</sup> CD28 <sup>+</sup> cells    | 53 | 0.450 | 0.539 | 0.067  | 252 | 248 | 330 | 270.5  |
| 94  | CD8 <sup>+</sup> CD27 <sup>+</sup> CD28 <sup>+</sup> cells       | 53 | 0.460 | 0.627 | 0.132  | 280 | 269 | 273 | 275.5  |
| 95  | TEMRA CD4 <sup>+</sup> CD27 <sup>+</sup> CD28 <sup>+</sup> cells | 53 | 0.534 | 0.676 | -0.191 | 302 | 294 | 211 | 277.25 |
| 96  | Tregs                                                            | 53 | 0.533 | 0.682 | -0.184 | 304 | 297 | 217 | 280.5  |
| 97  | miR-125b                                                         | 61 | 0.534 | 0.649 | -0.139 | 300 | 280 | 261 | 285.25 |
| 98  | TEMRA CD4 <sup>+</sup> CD27 <sup>+</sup> cells                   | 53 | 0.532 | 0.695 | -0.175 | 308 | 304 | 225 | 286.25 |
| 99  | EM CD4 <sup>+</sup> CD28 <sup>+</sup> cells                      | 53 | 0.456 | 0.590 | 0.036  | 264 | 262 | 357 | 286.75 |
| 100 | EM CD8 <sup>+</sup> cells                                        | 53 | 0.464 | 0.665 | 0.132  | 294 | 290 | 272 | 287.5  |
| 101 | EM CD8 <sup>+</sup> CD57 <sup>+</sup> cells                      | 53 | 0.530 | 0.718 | 0.158  | 311 | 311 | 241 | 293.5  |
| 102 | sCD27                                                            | 61 | 0.529 | 0.704 | -0.154 | 314 | 307 | 246 | 295.25 |
| 103 | Free active TGF- $\beta$ 1                                       | 61 | 0.501 | 0.981 | -1.549 | 399 | 394 | 13  | 301.25 |
| 104 | IL-17A                                                           | 61 | 0.498 | 0.988 | -1.227 | 396 | 397 | 18  | 301.75 |
| 105 | CD4 <sup>+</sup> CD28 <sup>+</sup> cells                         | 53 | 0.536 | 0.663 | -0.057 | 293 | 287 | 338 | 302.75 |
| 106 | IL-8                                                             | 61 | 0.537 | 0.629 | -0.023 | 291 | 271 | 370 | 305.75 |
| 107 | LAG-3                                                            | 61 | 0.495 | 0.949 | -0.415 | 385 | 379 | 97  | 311.5  |
| 108 | G8 score                                                         | 26 | 0.542 | 0.729 | -0.009 | 271 | 314 | 392 | 312    |
| 109 | NK-like T-cells                                                  | 53 | 0.511 | 0.901 | -0.317 | 375 | 373 | 133 | 314    |
| 110 | miR-195                                                          | 61 | 0.511 | 0.885 | -0.261 | 373 | 370 | 159 | 318.75 |
| 111 | TEMRA CD8 <sup>+</sup> cells                                     | 53 | 0.474 | 0.756 | 0.093  | 327 | 322 | 308 | 321    |
| 112 | TEMRA CD8 <sup>+</sup> CD27 <sup>+</sup> CD28 <sup>+</sup> cells | 53 | 0.474 | 0.749 | 0.080  | 324 | 320 | 317 | 321.25 |
| 113 | Naive CD8 <sup>+</sup> CD27 <sup>+</sup> CD28 <sup>+</sup> cells | 53 | 0.521 | 0.798 | 0.136  | 344 | 339 | 266 | 323.25 |
| 114 | Myeloid dendritic cells                                          | 53 | 0.484 | 0.852 | 0.167  | 359 | 357 | 236 | 327.75 |
| 115 | Naive CD8 <sup>+</sup> CD27 <sup>+</sup> cells                   | 53 | 0.521 | 0.803 | 0.126  | 346 | 343 | 277 | 328    |
| 116 | CD3 <sup>+</sup> cells                                           | 53 | 0.474 | 0.749 | 0.045  | 325 | 319 | 348 | 329.25 |
| 117 | PD-L2                                                            | 61 | 0.530 | 0.694 | 0.006  | 310 | 303 | 396 | 329.75 |
| 118 | Naive CD8 <sup>+</sup> CD28 <sup>+</sup> cells                   | 53 | 0.523 | 0.783 | 0.069  | 336 | 333 | 328 | 333.25 |
| 119 | Non-classical monocytes                                          | 53 | 0.474 | 0.757 | -0.037 | 329 | 326 | 355 | 334.75 |
| 120 | IL-6                                                             | 61 | 0.502 | 0.983 | 0.245  | 394 | 395 | 168 | 337.75 |
| 121 | Naive CD8 <sup>+</sup> cells                                     | 53 | 0.526 | 0.757 | 0.016  | 326 | 324 | 379 | 338.75 |
| 122 | B-cells                                                          | 53 | 0.526 | 0.757 | 0.018  | 328 | 325 | 376 | 339.25 |
| 123 | CD8 <sup>+</sup> CD57 <sup>+</sup> cells                         | 53 | 0.523 | 0.784 | -0.031 | 335 | 334 | 361 | 341.25 |
| 124 | EM CD8 <sup>+</sup> CD28 <sup>+</sup> cells                      | 53 | 0.480 | 0.812 | 0.072  | 349 | 345 | 323 | 341.5  |
| 125 | CD4 <sup>+</sup> cells                                           | 53 | 0.521 | 0.798 | -0.058 | 345 | 340 | 337 | 341.75 |
| 126 | EM CD4 <sup>+</sup> cells                                        | 53 | 0.479 | 0.796 | 0.044  | 343 | 338 | 349 | 343.25 |
| 127 | CD8 <sup>+</sup> CD28 <sup>+</sup> cells                         | 53 | 0.520 | 0.812 | -0.044 | 348 | 344 | 350 | 347.5  |

|                      |                                                                  |    |       |       |        |     |     |     |        |
|----------------------|------------------------------------------------------------------|----|-------|-------|--------|-----|-----|-----|--------|
| 128                  | TEMRA CD4 <sup>+</sup> CD28 <sup>+</sup> cells                   | 53 | 0.484 | 0.853 | 0.060  | 358 | 358 | 336 | 352.5  |
| 129                  | Hematopoietic stem cells                                         | 53 | 0.502 | 0.986 | 0.175  | 395 | 396 | 227 | 353.25 |
| 130                  | miR-19b                                                          | 61 | 0.485 | 0.846 | 0.029  | 362 | 353 | 364 | 360.25 |
| 131                  | Intermediate monocytes                                           | 53 | 0.500 | 1.000 | -0.121 | 402 | 402 | 281 | 371.75 |
| 132                  | Naive Tregs                                                      | 53 | 0.487 | 0.881 | 0.014  | 370 | 367 | 382 | 372.25 |
| 133                  | Classical monocytes                                              | 53 | 0.497 | 0.979 | 0.017  | 393 | 391 | 378 | 388.75 |
| 134                  | TEMRA CD8 <sup>+</sup> CD57 <sup>+</sup> cells                   | 53 | 0.503 | 0.979 | -0.002 | 392 | 390 | 401 | 393.75 |
| LOW CD3 INFILTRATION |                                                                  |    |       |       |        |     |     |     |        |
| 1                    | T-cell <i>P16<sup>INK4a</sup></i>                                | 41 | 0.755 | 0.017 | -1.754 | 2   | 15  | 8   | 6.75   |
| 2                    | CM CD8 <sup>+</sup> CD27 <sup>+</sup> CD28 <sup>+</sup> cells    | 53 | 0.254 | 0.007 | 0.900  | 5   | 6   | 30  | 11.5   |
| 3                    | CM CD8 <sup>+</sup> cells                                        | 53 | 0.248 | 0.007 | 0.819  | 4   | 4   | 38  | 12.5   |
| 4                    | CM CD8 <sup>+</sup> CD28 <sup>+</sup> cells                      | 53 | 0.254 | 0.008 | 0.855  | 6   | 9   | 36  | 14.25  |
| 5                    | CM CD8 <sup>+</sup> CD27 <sup>+</sup> cells                      | 53 | 0.260 | 0.010 | 0.874  | 7   | 12  | 33  | 14.75  |
| 6                    | PD-1                                                             | 61 | 0.689 | 0.029 | -1.757 | 19  | 18  | 7   | 15.75  |
| 7                    | PD-L1                                                            | 61 | 0.688 | 0.030 | -0.868 | 20  | 19  | 34  | 23.25  |
| 8                    | CM CD8 <sup>+</sup> CD57 <sup>+</sup> cells                      | 53 | 0.295 | 0.028 | 0.599  | 15  | 17  | 59  | 26.5   |
| 9                    | EM CD4 <sup>+</sup> CD27 <sup>+</sup> CD28 <sup>+</sup> cells    | 53 | 0.687 | 0.046 | -0.732 | 23  | 26  | 46  | 29.5   |
| 10                   | TEMRA CD4 <sup>+</sup> CD27 <sup>+</sup> CD28 <sup>+</sup> cells | 53 | 0.673 | 0.064 | -0.769 | 28  | 31  | 40  | 31.75  |
| 11                   | Naive CD8 <sup>+</sup> CD57 <sup>+</sup> cells                   | 53 | 0.341 | 0.090 | 1.076  | 36  | 42  | 21  | 33.75  |
| 12                   | CRP                                                              | 61 | 0.326 | 0.045 | 0.577  | 27  | 25  | 63  | 35.5   |
| 13                   | CD8 <sup>+</sup> cells                                           | 53 | 0.698 | 0.033 | -0.425 | 17  | 20  | 93  | 36.75  |
| 14                   | let-7e                                                           | 61 | 0.337 | 0.061 | 0.635  | 33  | 30  | 54  | 37.5   |
| 15                   | TEMRA CD4 <sup>+</sup> CD57 <sup>+</sup> cells                   | 53 | 0.661 | 0.086 | -0.679 | 35  | 40  | 51  | 40.25  |
| 16                   | miR-181a                                                         | 61 | 0.332 | 0.053 | 0.512  | 31  | 28  | 76  | 41.5   |
| 17                   | Naive CD8 <sup>+</sup> CD27 <sup>+</sup> CD28 <sup>+</sup> cells | 53 | 0.346 | 0.100 | 0.710  | 39  | 47  | 47  | 43     |
| 18                   | miR-195                                                          | 61 | 0.638 | 0.112 | -0.907 | 49  | 52  | 29  | 44.75  |
| 19                   | miR-92a                                                          | 61 | 0.323 | 0.042 | 0.378  | 25  | 23  | 107 | 45     |
| 20                   | CD4 <sup>+</sup> CD27 <sup>+</sup> CD28 <sup>+</sup> cells       | 53 | 0.649 | 0.111 | -0.678 | 41  | 51  | 52  | 46.25  |
| 21                   | Intermediate monocytes                                           | 53 | 0.335 | 0.077 | 0.371  | 32  | 35  | 108 | 51.75  |
| 22                   | CM CD4 <sup>+</sup> CD28 <sup>+</sup> cells                      | 53 | 0.354 | 0.119 | 0.555  | 43  | 56  | 66  | 52     |
| 23                   | Naive B-cells                                                    | 53 | 0.329 | 0.067 | 0.333  | 29  | 32  | 125 | 53.75  |
| 24                   | CM CD4 <sup>+</sup> cells                                        | 53 | 0.358 | 0.130 | 0.560  | 45  | 61  | 65  | 54     |
| 25                   | EM CD4 <sup>+</sup> CD57 <sup>+</sup> cells                      | 53 | 0.635 | 0.151 | -0.749 | 53  | 69  | 44  | 54.75  |
| 26                   | CD4/CD8 ratio                                                    | 53 | 0.359 | 0.131 | 0.547  | 46  | 62  | 69  | 55.75  |
| 27                   | CM CD4 <sup>+</sup> CD57 <sup>+</sup> cells                      | 53 | 0.369 | 0.163 | 0.687  | 57  | 71  | 50  | 58.75  |
| 28                   | Tregs                                                            | 53 | 0.372 | 0.172 | 0.463  | 61  | 75  | 85  | 70.5   |
| 29                   | IL-17A                                                           | 61 | 0.608 | 0.215 | -1.934 | 91  | 99  | 6   | 71.75  |
| 30                   | CM CD4 <sup>+</sup> CD27 <sup>+</sup> cells                      | 53 | 0.377 | 0.192 | 0.524  | 65  | 84  | 73  | 71.75  |
| 31                   | miR-19b                                                          | 61 | 0.641 | 0.106 | -0.302 | 48  | 49  | 143 | 72     |
| 32                   | CM CD4 <sup>+</sup> CD27 <sup>+</sup> CD28 <sup>+</sup> cells    | 53 | 0.378 | 0.193 | 0.524  | 66  | 85  | 72  | 72.25  |
| 33                   | MCP-1                                                            | 61 | 0.346 | 0.076 | 0.185  | 38  | 34  | 216 | 81.5   |
| 34                   | Tumor grade                                                      | 61 | 0.641 | 0.054 | -0.178 | 47  | 29  | 221 | 86     |
| 35                   | CM CD8 <sup>+</sup> CD27 <sup>+</sup> CD28 <sup>+</sup> cells    | 53 | 0.384 | 0.215 | 0.347  | 74  | 97  | 117 | 90.5   |
| 36                   | Class-switched memory B-cells                                    | 53 | 0.620 | 0.200 | -0.306 | 68  | 87  | 140 | 90.75  |
| 37                   | EM CD8 <sup>+</sup> CD27 <sup>+</sup> CD28 <sup>+</sup> cells    | 53 | 0.381 | 0.206 | 0.275  | 71  | 94  | 153 | 97.25  |

|    |                                                                  |    |       |       |        |     |     |     |        |
|----|------------------------------------------------------------------|----|-------|-------|--------|-----|-----|-----|--------|
| 38 | TEMRA CD8 <sup>+</sup> cells                                     | 53 | 0.617 | 0.211 | -0.280 | 73  | 95  | 152 | 98.25  |
| 39 | Naive CD4 <sup>+</sup> CD57 <sup>+</sup> cells                   | 53 | 0.404 | 0.306 | 0.671  | 109 | 126 | 53  | 99.25  |
| 40 | CD4 <sup>+</sup> Tregs                                           | 53 | 0.377 | 0.189 | 0.208  | 64  | 83  | 196 | 101.75 |
| 41 | EM CD8 <sup>+</sup> CD27 <sup>+</sup> cells                      | 53 | 0.387 | 0.227 | 0.286  | 79  | 103 | 149 | 102.5  |
| 42 | sCD27                                                            | 61 | 0.399 | 0.247 | 0.414  | 102 | 109 | 98  | 102.75 |
| 43 | CD4 <sup>+</sup> CD28 <sup>+</sup> cells                         | 53 | 0.338 | 0.084 | 0.086  | 34  | 37  | 312 | 104.25 |
| 44 | Non-switched memory B-cells                                      | 53 | 0.604 | 0.272 | -0.322 | 97  | 117 | 131 | 110.5  |
| 45 | miR-9                                                            | 61 | 0.579 | 0.293 | -0.915 | 153 | 123 | 28  | 114.25 |
| 46 | TEMRA CD8 <sup>+</sup> CD27 <sup>-</sup> CD28 <sup>-</sup> cells | 53 | 0.594 | 0.316 | -0.317 | 113 | 134 | 134 | 123.5  |
| 47 | CD8 <sup>+</sup> CD27 <sup>-</sup> CD28 <sup>-</sup> cells       | 53 | 0.594 | 0.320 | -0.315 | 112 | 135 | 136 | 123.75 |
| 48 | IL-6                                                             | 61 | 0.388 | 0.200 | 0.155  | 84  | 89  | 245 | 125.5  |
| 49 | Age                                                              | 61 | 0.398 | 0.241 | 0.179  | 100 | 107 | 219 | 131.5  |
| 50 | CD8 <sup>+</sup> CD27 <sup>+</sup> cells                         | 53 | 0.400 | 0.287 | 0.196  | 105 | 121 | 209 | 135    |
| 51 | miR-17                                                           | 61 | 0.410 | 0.303 | 0.230  | 126 | 125 | 184 | 140.25 |
| 52 | TEMRA CD8 <sup>+</sup> CD27 <sup>+</sup> cells                   | 53 | 0.587 | 0.358 | -0.265 | 135 | 156 | 156 | 145.5  |
| 53 | TEMRA CD8 <sup>+</sup> CD57 <sup>+</sup> cells                   | 53 | 0.587 | 0.362 | -0.262 | 136 | 158 | 158 | 147    |
| 54 | TEMRA CD4 <sup>+</sup> cells                                     | 53 | 0.577 | 0.419 | -0.523 | 161 | 193 | 74  | 147.25 |
| 55 | Lymph node involvement                                           | 61 | 0.572 | 0.343 | -0.442 | 179 | 147 | 87  | 148    |
| 56 | CD86                                                             | 61 | 0.580 | 0.365 | -0.301 | 152 | 159 | 145 | 152    |
| 57 | EM CD8 <sup>+</sup> CD27 <sup>-</sup> CD28 <sup>-</sup> cells    | 53 | 0.575 | 0.426 | -0.502 | 170 | 198 | 77  | 153.75 |
| 58 | NK-cells                                                         | 53 | 0.583 | 0.384 | -0.265 | 144 | 172 | 157 | 154.25 |
| 59 | CD4 <sup>+</sup> CD57 <sup>+</sup> cells                         | 53 | 0.575 | 0.431 | -0.477 | 169 | 199 | 82  | 154.75 |
| 60 | CD8 <sup>+</sup> CD27 <sup>+</sup> CD28 <sup>+</sup> cells       | 53 | 0.413 | 0.358 | 0.206  | 137 | 157 | 198 | 157.25 |
| 61 | miR-155                                                          | 61 | 0.424 | 0.384 | 0.301  | 168 | 171 | 144 | 162.75 |
| 62 | CD8 <sup>+</sup> CD28 <sup>+</sup> cells                         | 53 | 0.412 | 0.351 | 0.158  | 129 | 151 | 242 | 162.75 |
| 63 | let-7i                                                           | 61 | 0.389 | 0.203 | -0.005 | 85  | 92  | 399 | 165.25 |
| 64 | Classical monocytes                                              | 53 | 0.602 | 0.282 | -0.049 | 101 | 120 | 346 | 167    |
| 65 | LAG-3                                                            | 61 | 0.590 | 0.306 | -0.108 | 125 | 127 | 295 | 168    |
| 66 | TEMRA CD8 <sup>+</sup> CD27 <sup>+</sup> CD28 <sup>+</sup> cells | 53 | 0.571 | 0.451 | -0.353 | 182 | 206 | 115 | 171.25 |
| 67 | miR-20a                                                          | 61 | 0.578 | 0.370 | -0.176 | 159 | 161 | 223 | 175.5  |
| 68 | CD4 <sup>+</sup> CD27 <sup>+</sup> CD28 <sup>+</sup> cells       | 53 | 0.415 | 0.373 | 0.139  | 141 | 163 | 260 | 176.25 |
| 69 | G8 score                                                         | 26 | 0.395 | 0.391 | 0.051  | 96  | 179 | 342 | 178.25 |
| 70 | IL-8                                                             | 61 | 0.412 | 0.311 | 0.066  | 130 | 130 | 331 | 180.25 |
| 71 | CD4 <sup>+</sup> CD27 <sup>+</sup> cells                         | 53 | 0.417 | 0.380 | 0.136  | 145 | 169 | 264 | 180.75 |
| 72 | TEMRA CD8 <sup>+</sup> CD28 <sup>+</sup> cells                   | 53 | 0.573 | 0.438 | -0.236 | 176 | 204 | 176 | 183    |
| 73 | Myeloid dendritic cells                                          | 53 | 0.563 | 0.502 | -0.426 | 206 | 233 | 92  | 184.25 |
| 74 | B-cells                                                          | 53 | 0.410 | 0.341 | 0.027  | 122 | 146 | 365 | 188.75 |
| 75 | CD4 <sup>+</sup> cells                                           | 53 | 0.425 | 0.431 | 0.172  | 171 | 200 | 229 | 192.75 |
| 76 | IL-27                                                            | 61 | 0.575 | 0.393 | 0.150  | 172 | 180 | 249 | 193.25 |
| 77 | 4-1BB                                                            | 61 | 0.546 | 0.534 | -1.457 | 258 | 247 | 15  | 194.5  |
| 78 | IL-17F                                                           | 61 | 0.464 | 0.398 | 1.606  | 297 | 185 | 10  | 197.25 |
| 79 | IL-1 $\beta$                                                     | 61 | 0.576 | 0.383 | 0.112  | 167 | 170 | 291 | 198.75 |
| 80 | TEMRA CD4 <sup>+</sup> CD28 <sup>+</sup> cells                   | 53 | 0.562 | 0.520 | -0.313 | 212 | 239 | 138 | 200.25 |
| 81 | CM CD4 <sup>+</sup> CD27 <sup>-</sup> CD28 <sup>-</sup> cells    | 53 | 0.545 | 0.619 | 1.304  | 260 | 265 | 17  | 200.5  |
| 82 | PD-L2                                                            | 61 | 0.422 | 0.374 | 0.072  | 158 | 164 | 322 | 200.5  |



|     |                                                                  |    |       |       |        |     |     |     |        |
|-----|------------------------------------------------------------------|----|-------|-------|--------|-----|-----|-----|--------|
| 83  | Hematopoietic stem cells                                         | 53 | 0.429 | 0.449 | 0.159  | 183 | 205 | 240 | 202.75 |
| 84  | miR-125b                                                         | 61 | 0.565 | 0.456 | -0.176 | 199 | 211 | 224 | 208.25 |
| 85  | miR-146a                                                         | 61 | 0.443 | 0.514 | 0.305  | 230 | 236 | 141 | 209.25 |
| 86  | Plasmacytoid dendritic cells                                     | 53 | 0.570 | 0.457 | -0.136 | 185 | 212 | 265 | 211.75 |
| 87  | TEMRA CD4 <sup>+</sup> CD27 <sup>+</sup> cells                   | 53 | 0.568 | 0.469 | -0.148 | 190 | 223 | 251 | 213.5  |
| 88  | IL-10                                                            | 61 | 0.570 | 0.421 | -0.097 | 184 | 195 | 304 | 216.75 |
| 89  | Free active TGF- $\beta$ 1                                       | 61 | 0.522 | 0.431 |        | 342 | 201 | 1   | 221.5  |
| 90  | NK-like T-cells                                                  | 53 | 0.542 | 0.657 | -0.402 | 272 | 282 | 103 | 232.25 |
| 91  | CTLA-4                                                           | 61 | 0.472 | 0.631 | 1.138  | 320 | 272 | 19  | 232.75 |
| 92  | sCD25                                                            | 61 | 0.457 | 0.625 | 0.310  | 269 | 266 | 139 | 235.75 |
| 93  | TEMRA CD4 <sup>+</sup> CD27 <sup>+</sup> CD28 <sup>+</sup> cells | 53 | 0.560 | 0.528 | -0.125 | 225 | 242 | 279 | 242.75 |
| 94  | EM CD8 <sup>+</sup> CD28 <sup>+</sup> cells                      | 53 | 0.442 | 0.546 | 0.134  | 229 | 251 | 267 | 244    |
| 95  | CD56 <sup>bright</sup> CD16 <sup>-</sup> NK-cells                | 53 | 0.452 | 0.613 | 0.168  | 253 | 263 | 235 | 251    |
| 96  | EM CD4 <sup>+</sup> cells                                        | 53 | 0.544 | 0.642 | -0.178 | 262 | 278 | 220 | 255.5  |
| 97  | TNF- $\alpha$                                                    | 61 | 0.529 | 0.743 | 0.370  | 316 | 317 | 109 | 264.5  |
| 98  | Memory Tregs                                                     | 53 | 0.448 | 0.588 | 0.079  | 248 | 261 | 318 | 268.75 |
| 99  | CD8 <sup>+</sup> CD57 <sup>+</sup> cells                         | 53 | 0.540 | 0.675 | -0.133 | 276 | 292 | 268 | 278    |
| 100 | CD56 <sup>dim</sup> CD16 <sup>+</sup> NK-cells                   | 53 | 0.552 | 0.588 | -0.024 | 247 | 260 | 367 | 280.25 |
| 101 | miR-21                                                           | 61 | 0.461 | 0.657 | 0.130  | 284 | 284 | 274 | 281.5  |
| 102 | CD3 <sup>+</sup> cells                                           | 53 | 0.543 | 0.649 | -0.071 | 270 | 279 | 327 | 286.5  |
| 103 | miR-126                                                          | 61 | 0.533 | 0.706 | -0.169 | 305 | 308 | 233 | 287.75 |
| 104 | EM CD8 <sup>+</sup> cells                                        | 53 | 0.454 | 0.631 | 0.021  | 255 | 273 | 374 | 289.25 |
| 105 | EM CD4 <sup>+</sup> CD28 <sup>+</sup> cells                      | 53 | 0.540 | 0.675 | -0.073 | 277 | 293 | 321 | 292    |
| 106 | Naive CD8 <sup>+</sup> cells                                     | 53 | 0.458 | 0.661 | 0.037  | 273 | 286 | 354 | 296.5  |
| 107 | miR-223                                                          | 61 | 0.464 | 0.688 | 0.082  | 295 | 302 | 316 | 302    |
| 108 | IFN- $\gamma$                                                    | 61 | 0.534 | 0.699 | 0.103  | 303 | 305 | 301 | 303    |
| 109 | IL-1 $\alpha$                                                    | 61 | 0.470 | 0.738 | 0.130  | 312 | 316 | 275 | 303.75 |
| 110 | miR-326                                                          | 61 | 0.512 | 0.882 | -0.327 | 371 | 368 | 128 | 309.5  |
| 111 | TIM-3                                                            | 61 | 0.496 | 0.967 | 0.489  | 387 | 387 | 80  | 310.25 |
| 112 | Gal-9                                                            | 61 | 0.486 | 0.875 | 0.285  | 364 | 364 | 150 | 310.5  |
| 113 | Tumor size                                                       | 61 | 0.520 | 0.826 | 0.207  | 350 | 350 | 197 | 311.75 |
| 114 | IL12p70                                                          | 61 | 0.517 | 0.854 | 0.188  | 356 | 359 | 213 | 321    |
| 115 | Naive CD4 <sup>+</sup> CD28 <sup>+</sup> cells                   | 53 | 0.535 | 0.718 | -0.009 | 298 | 309 | 390 | 323.75 |
| 116 | Non-classical monocytes                                          | 53 | 0.471 | 0.767 | 0.060  | 318 | 329 | 335 | 325    |
| 117 | Naive CD8 <sup>+</sup> CD28 <sup>+</sup> cells                   | 53 | 0.465 | 0.718 | -0.007 | 299 | 310 | 395 | 325.75 |
| 118 | EM CD8 <sup>+</sup> CD57 <sup>+</sup> cells                      | 53 | 0.487 | 0.894 | -0.206 | 369 | 372 | 199 | 327.25 |
| 119 | Naive CD4 <sup>+</sup> CD27 <sup>+</sup> CD28 <sup>-</sup> cells | 53 | 0.486 | 0.885 | 0.175  | 367 | 369 | 226 | 332.25 |
| 120 | Naive CD8 <sup>+</sup> CD27 <sup>+</sup> CD28 <sup>+</sup> cells | 53 | 0.475 | 0.799 | -0.071 | 332 | 341 | 325 | 332.5  |
| 121 | Naive CD4 <sup>+</sup> cells                                     | 53 | 0.533 | 0.736 | 0.001  | 307 | 315 | 402 | 332.75 |
| 122 | Naive CD4 <sup>+</sup> CD27 <sup>+</sup> cells                   | 53 | 0.531 | 0.752 | -0.009 | 309 | 321 | 394 | 333.25 |
| 123 | Naive CD8 <sup>+</sup> CD27 <sup>+</sup> cells                   | 53 | 0.478 | 0.820 | -0.071 | 337 | 349 | 326 | 337.25 |
| 124 | Naive CD4 <sup>+</sup> CD27 <sup>+</sup> CD28 <sup>+</sup> cells | 53 | 0.529 | 0.767 | -0.013 | 317 | 328 | 387 | 337.25 |
| 125 | Monocytes                                                        | 53 | 0.515 | 0.878 | 0.113  | 360 | 365 | 289 | 343.5  |
| 126 | IP-10                                                            | 61 | 0.505 | 0.960 | 0.133  | 386 | 385 | 269 | 356.5  |
| 127 | miR-19a                                                          | 61 | 0.518 | 0.841 | 0.022  | 354 | 352 | 372 | 358    |

|     |                                                               |    |       |       |        |     |     |     |        |
|-----|---------------------------------------------------------------|----|-------|-------|--------|-----|-----|-----|--------|
| 128 | miR-424                                                       | 61 | 0.486 | 0.874 | 0.035  | 365 | 363 | 359 | 363    |
| 129 | EM CD4 <sup>+</sup> CD27 <sup>+</sup> CD28 <sup>+</sup> cells | 53 | 0.506 | 0.959 | 0.076  | 382 | 383 | 319 | 366.5  |
| 130 | miR-18a                                                       | 61 | 0.515 | 0.867 | -0.013 | 361 | 361 | 386 | 367.25 |
| 131 | EM CD4 <sup>+</sup> CD27 <sup>+</sup> cells                   | 53 | 0.506 | 0.959 | 0.068  | 381 | 382 | 329 | 368.25 |
| 132 | Naive Tregs                                                   | 53 | 0.512 | 0.911 | -0.013 | 372 | 374 | 385 | 375.75 |
| 133 | IGF-1                                                         | 61 | 0.503 | 0.980 | -0.024 | 390 | 393 | 368 | 385.25 |
| 134 | miR-150                                                       | 61 | 0.499 | 0.993 | -0.013 | 398 | 398 | 384 | 394.5  |
